# Supplementary material for: An attempt to prepare sulfonyl analogues of fotemustine: unexpected rearrangement to sulfamate during nitrosation step
Source: Royal Society of Chemistry journal article supplement (doi:10.1039/d3ra07001h), 2023-01-01
Supplement: d3ra07001h1.pdf [file d3ra07001h1.pdf]

## **An attempt to prepare sulfonyl analogues of Fotemustine: unexpected rearrangement to sulfamate during nitrosation step**

**Zineb Aouf,<sup>\*a</sup> Sarah Boughaba,<sup>ab</sup> Rayene Sayad,<sup>a</sup> Jacques Lebreton,<sup>c</sup> Monique Mathe-Allainmat,<sup>c</sup> Nour-Eddine Aouf<sup>a</sup>**

<sup>[a]</sup> Laboratory of Applied Organic Chemistry, Bioorganic Chemistry Group, Sciences Faculty, Chemistry Department, Badji Mokhtar-Annaba University, Box 12, 23000 Annaba, Algeria.

<sup>[b]</sup> Higher National School of Forests, Khenchela, Algeria.

<sup>[c]</sup> Université de Nantes, CEISAM, Chimie Et Interdisciplinarité, Synthèse, Analyse, Modélisation, UMR CNRS 6230, UFR des Sciences et des Techniques, 2 rue de la Houssinière, BP 92208, 44322 Nantes Cedex 3, France.

Corresponding author E-mail: [aouf.zineb27@gmail.com](mailto:aouf.zineb27@gmail.com)

### **Supporting Information**

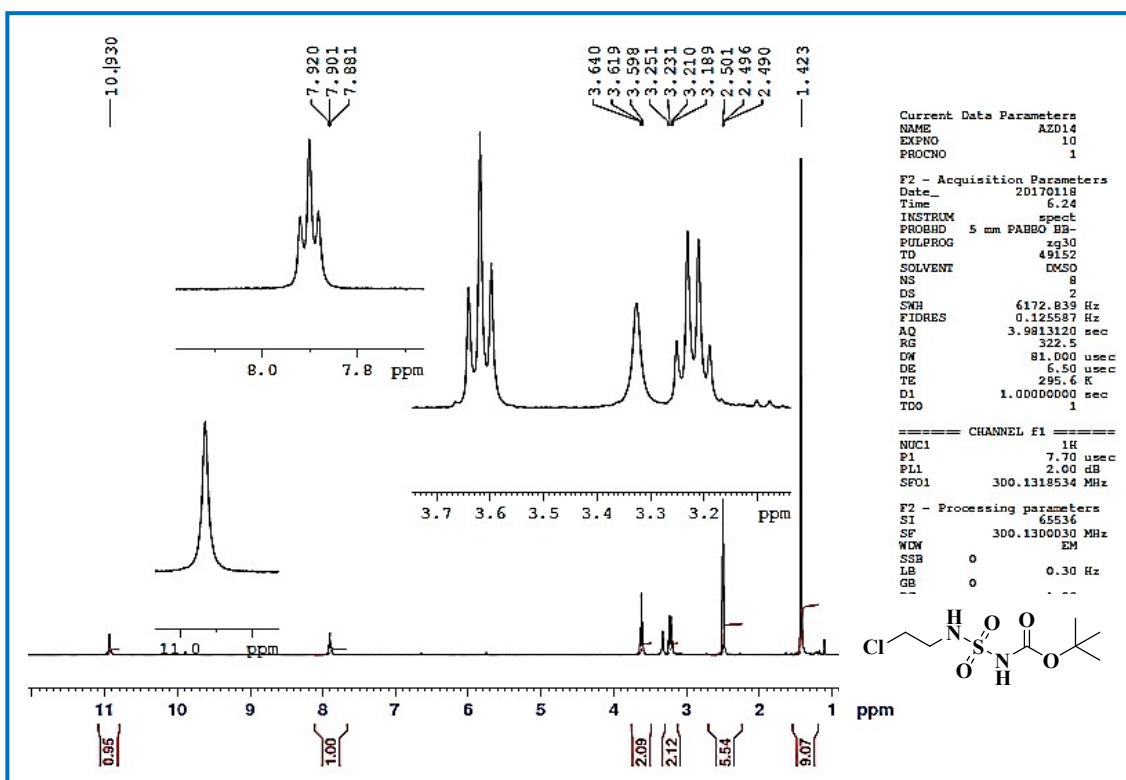

**<sup>1</sup>H NMR Spectrum: Tert-butyl (N-(2-chloroethyl)sulfamoyl)carbamate (14)**

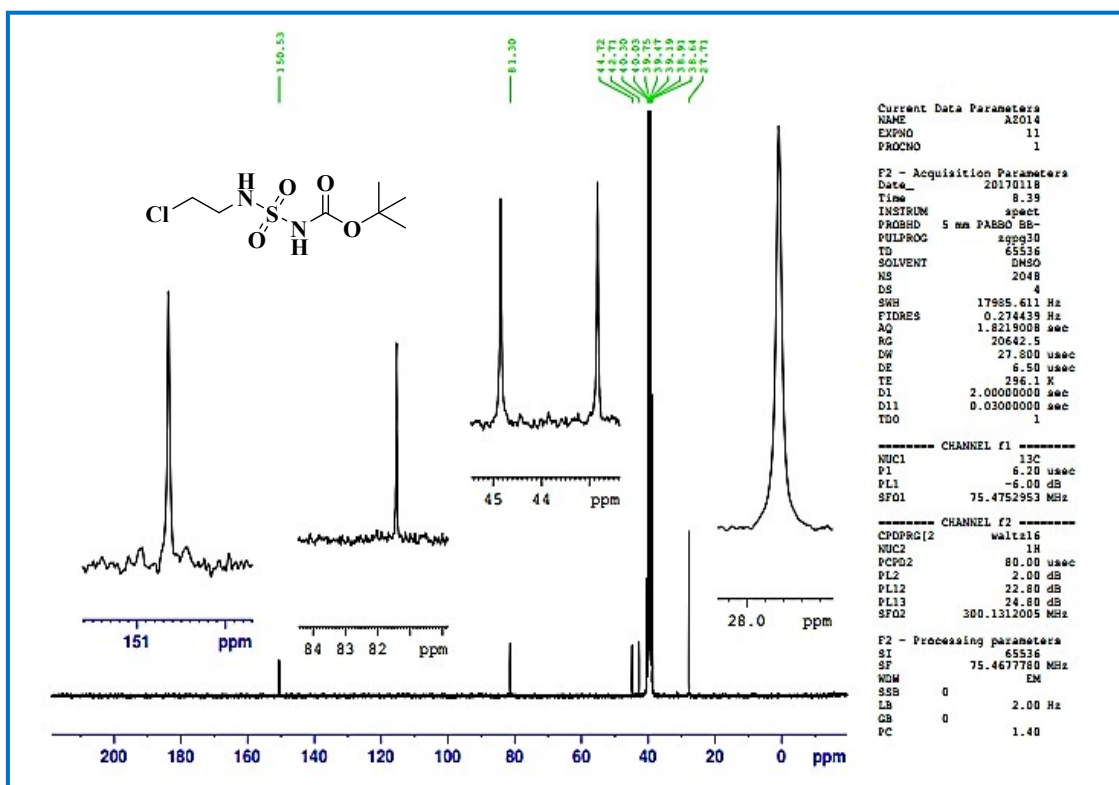

**<sup>13</sup>C NMR Spectrum: Tert-butyl (N-(2-chloroethyl)sulfamoyl)carbamate (14)**

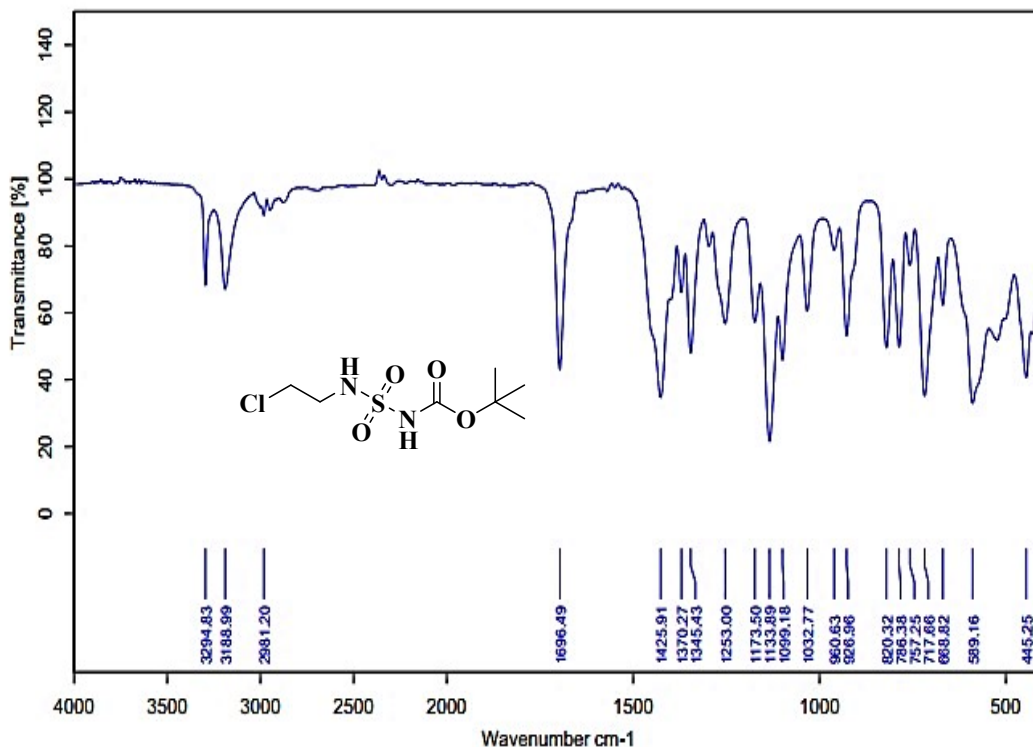

**IR Spectrum: Tert-butyl (N-(2-chloroethyl)sulfamoyl)carbamate (14)**

20161202\_AZ14 #9 RT: 0.08 AV: 1 NL: 2.61E8  
T: FTMS + p ESI Full ms [110.00-1000.00]

AZ14 – LTQ Orbitrap – ESI+  
MeOH+0.1% Ac.Form.

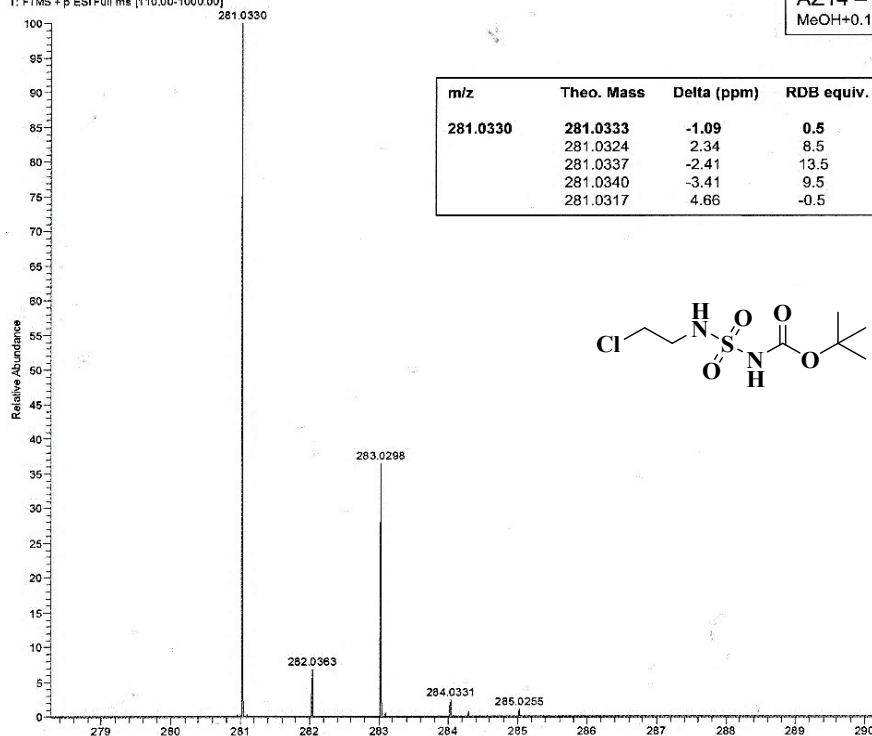

| m/z      | Theo. Mass | Delta (ppm) | RDB equiv. | Composition          |
|----------|------------|-------------|------------|----------------------|
| 281.0330 | 281.0333   | -1.09       | 0.5        | C7 H15 O4 N2 Cl Na S |
|          | 281.0324   | 2.34        | 8.5        | C12 H10 O4 N2 Cl     |
|          | 281.0337   | -2.41       | 13.5       | C13 H6 N6 Cl         |
|          | 281.0340   | -3.41       | 9.5        | C15 H11 O2 Cl Na     |
|          | 281.0317   | 4.66        | -0.5       | C4 H14 O6 N4 Cl S    |

**MS Spectrum: Tert-butyl (N-(2-chloroethyl)sulfamoyl)carbamate (14)**

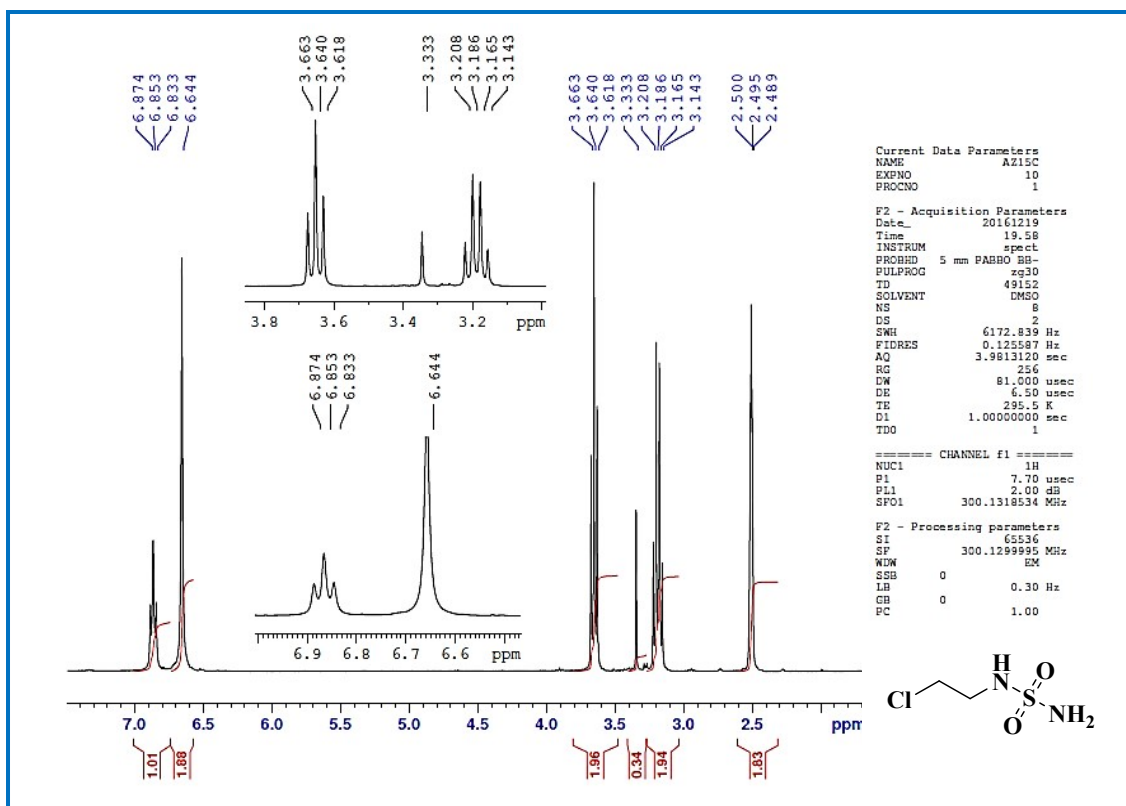

**<sup>1</sup>H NMR Spectrum: 2-Chloroethylsulfamide (15)**

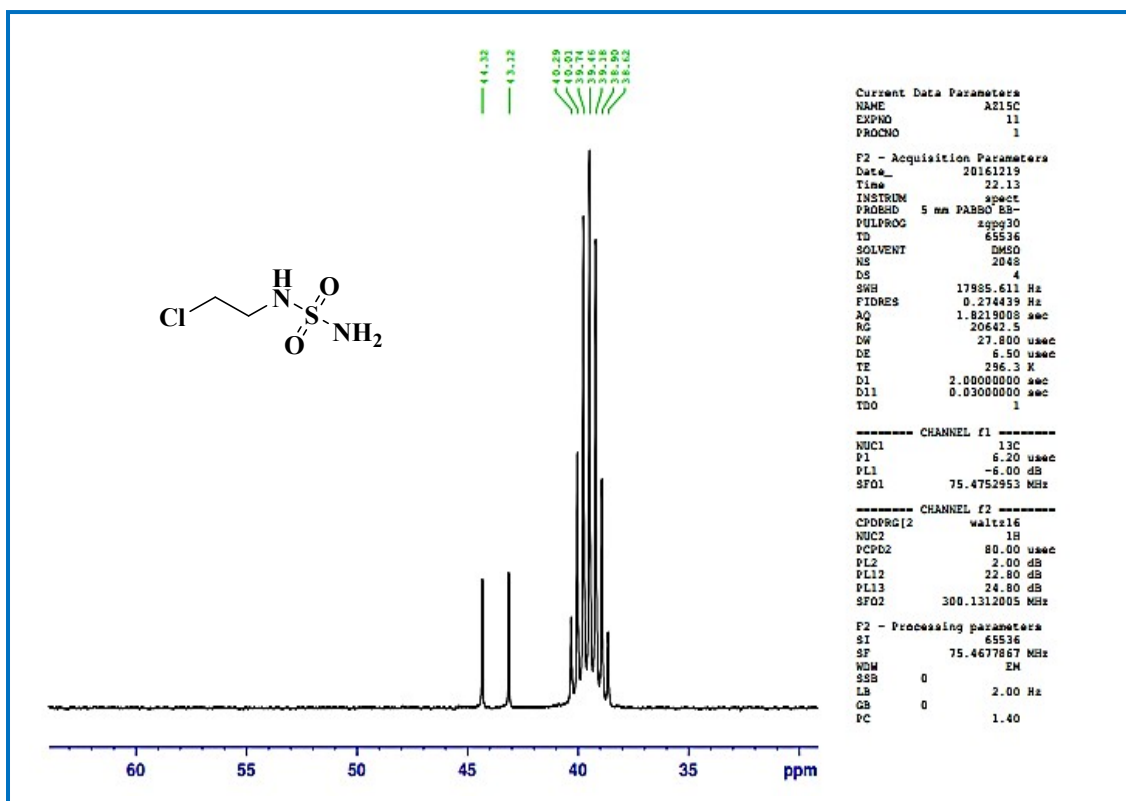

**<sup>13</sup>C NMR Spectrum: 2-Chloroethylsulfamide (15)**

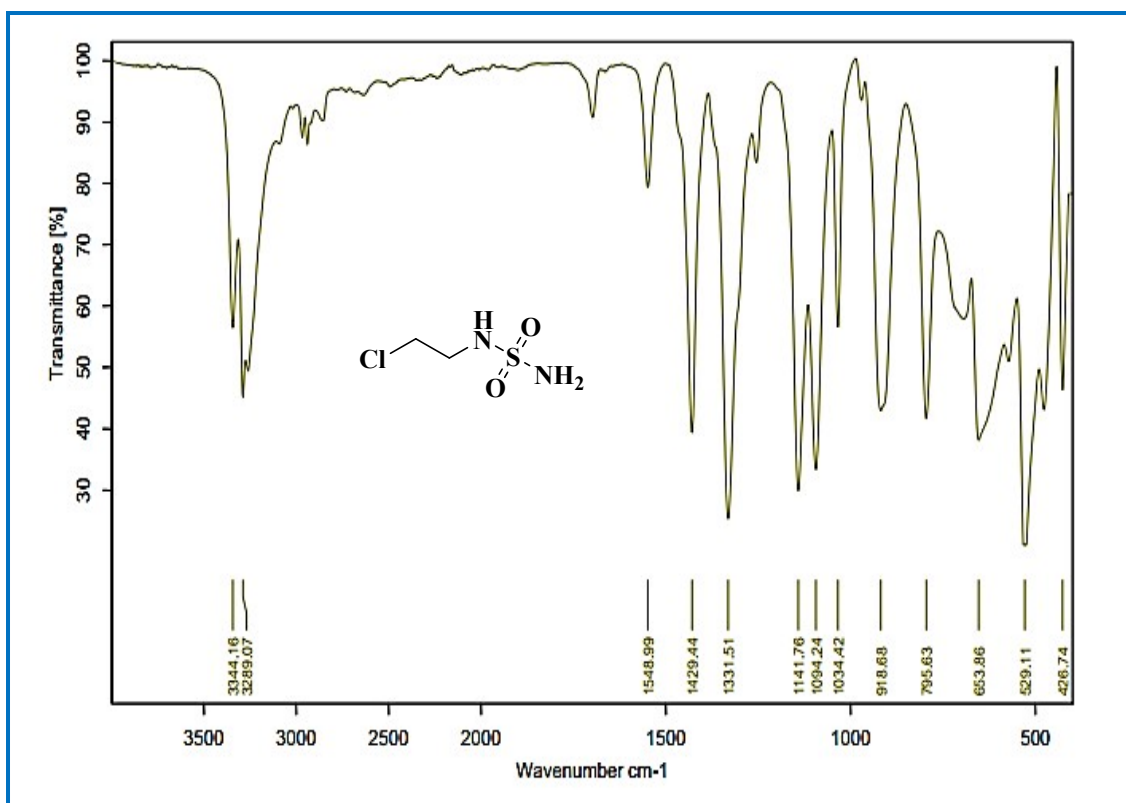

*IR Spectrum: 2-Chloroethylsulfamide (15)*

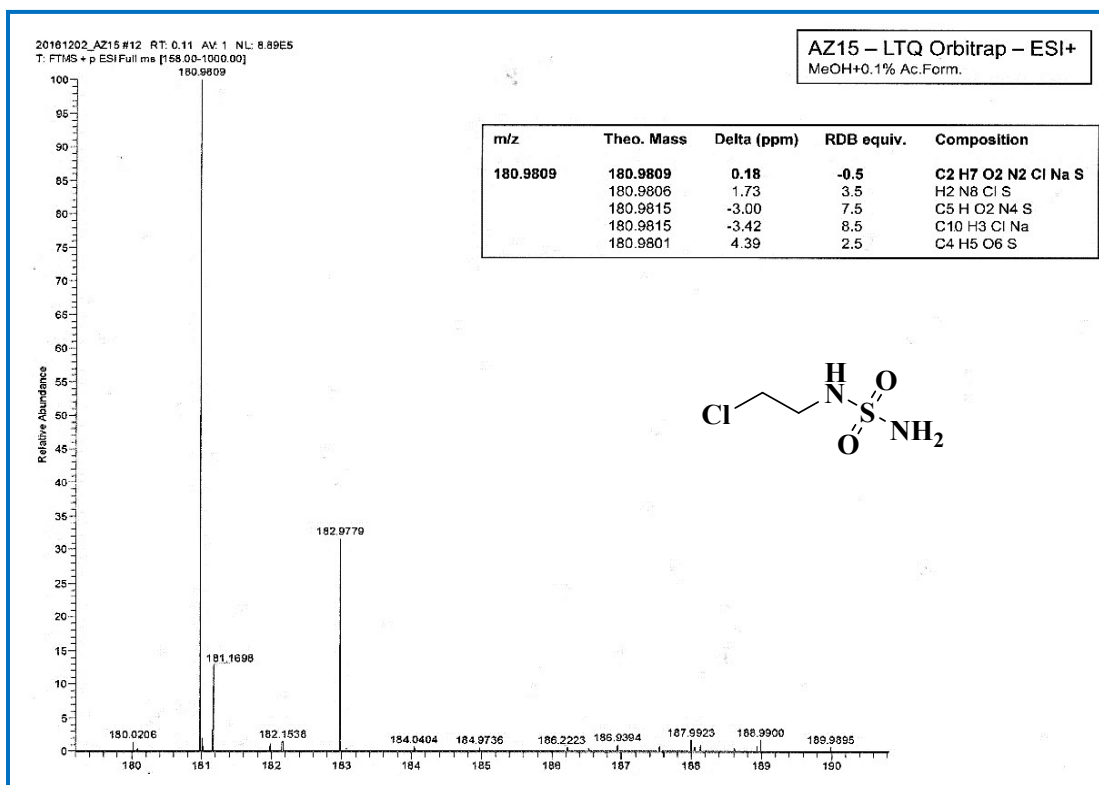

*MS Spectrum: 2-Chloroethylsulfamide (15)*

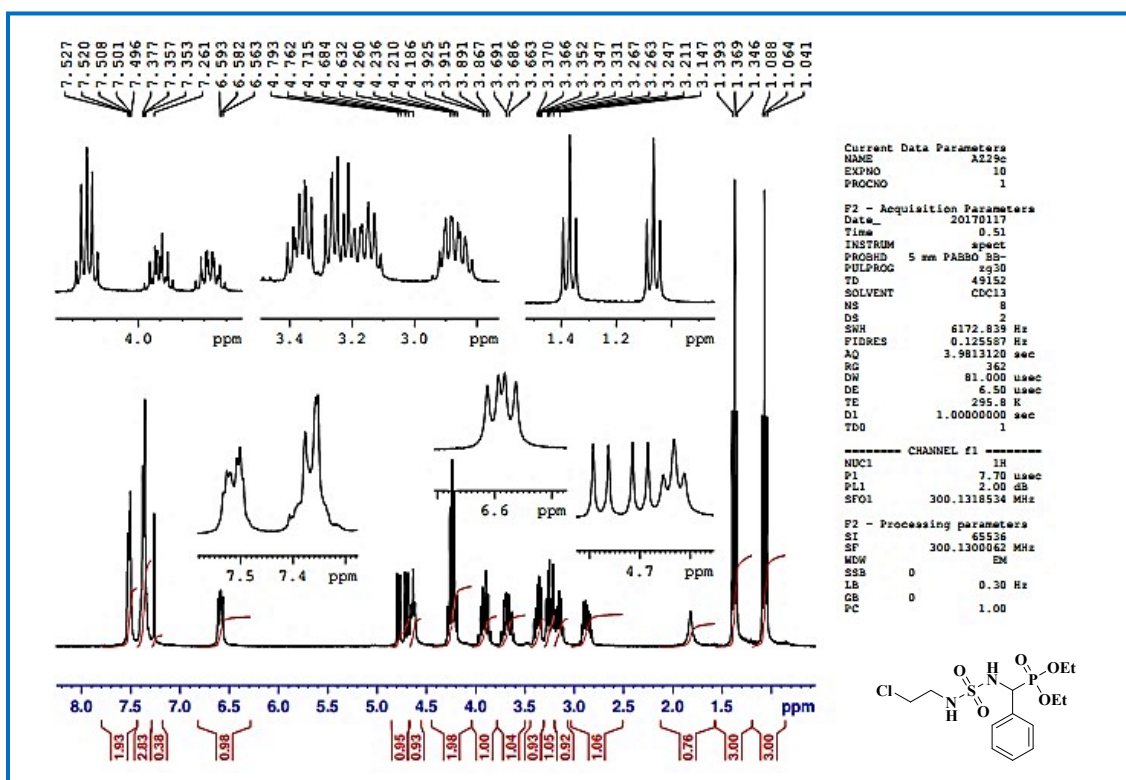

**<sup>1</sup>H NMR Spectrum:** Diethyl (((N-(2-chloroethyl)sulfamoyl)amino)(phenyl)methyl)phosphonate (16a)

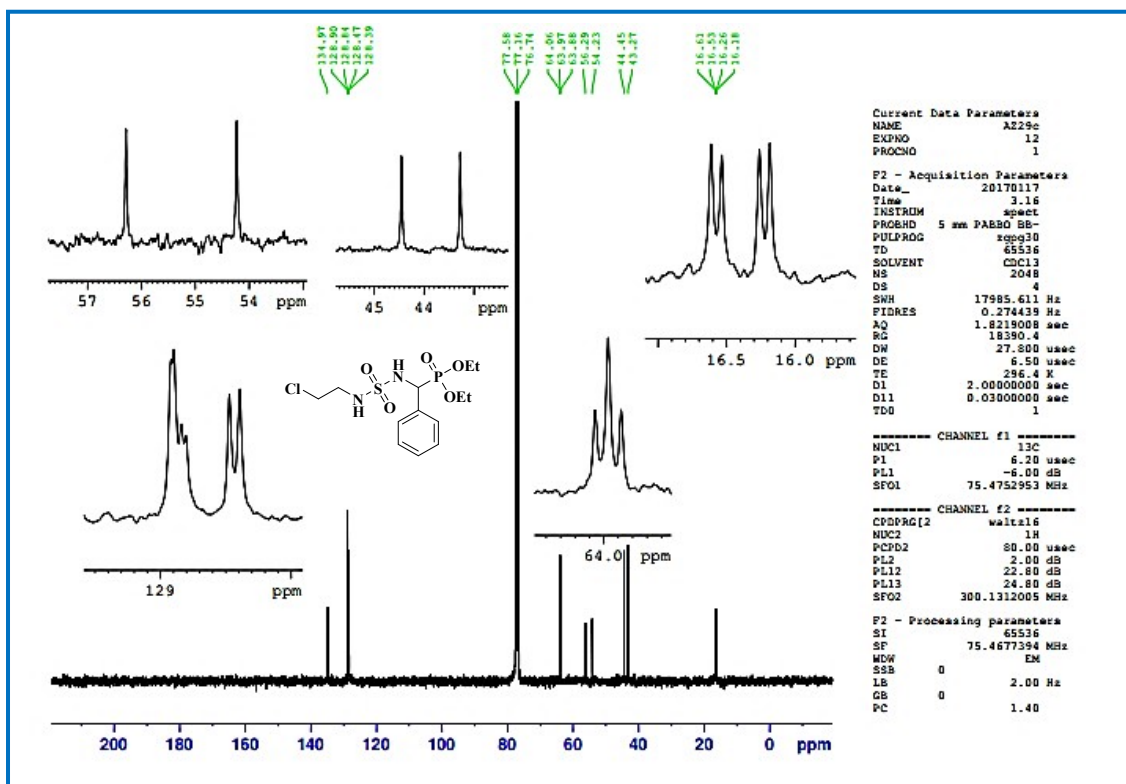

**<sup>13</sup>C NMR Spectrum:** Diethyl (((N-(2-chloroethyl)sulfamoyl)amino)(phenyl)methyl)phosphonate (16a)

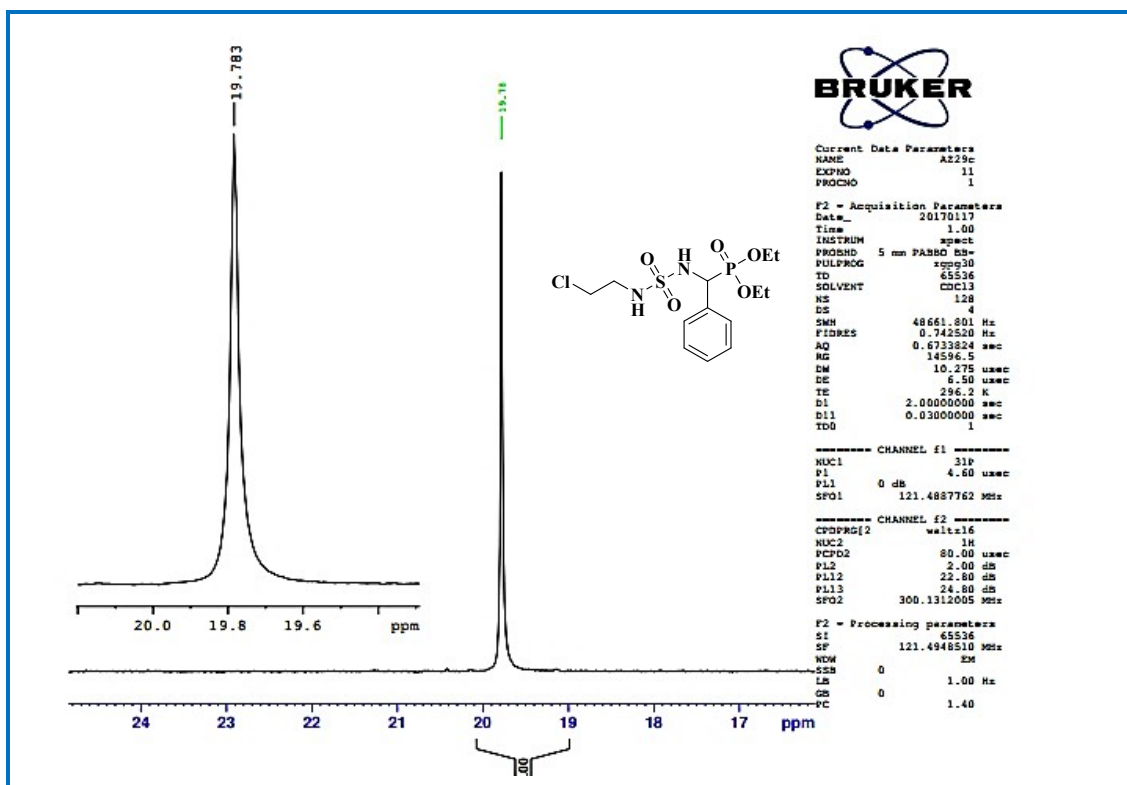

**<sup>31</sup>P NMR Spectrum:** Diethyl (((N-(2-chloroethyl)sulfamoyl)amino)(phenyl)methyl)phosphonate (**16a**)

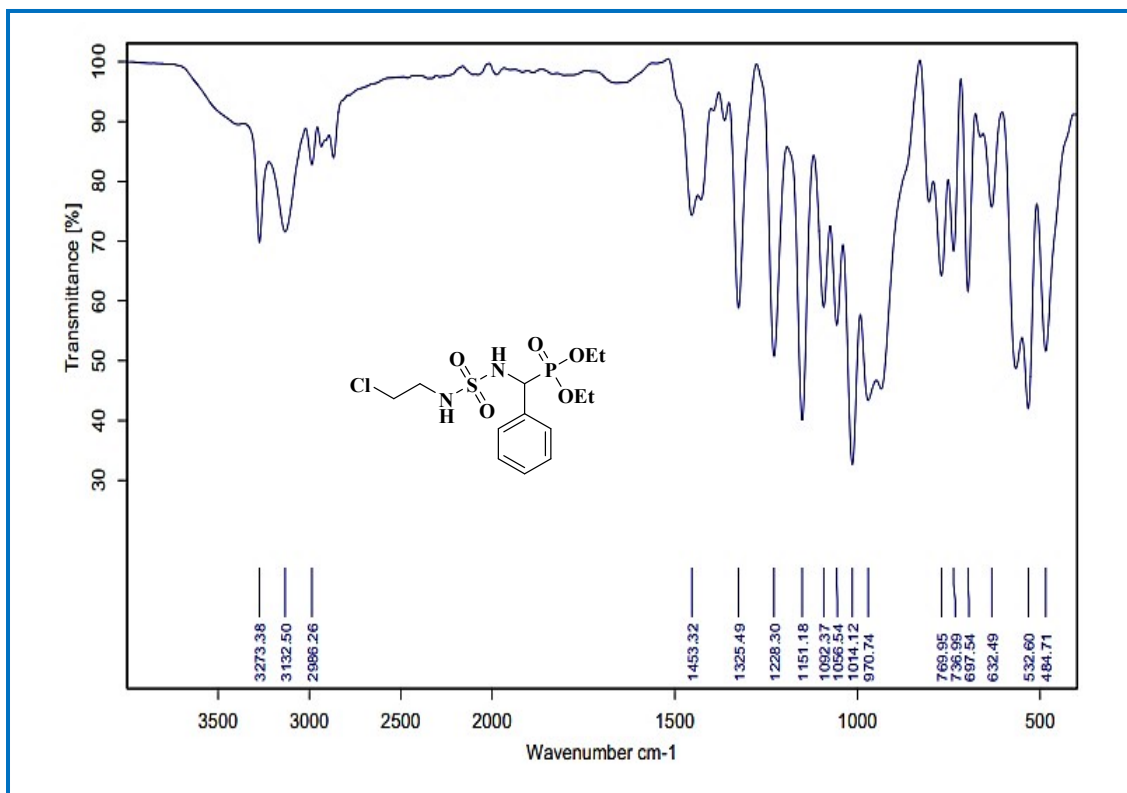

**IR Spectrum:** Diethyl (((N-(2-chloroethyl)sulfamoyl)amino)(phenyl)methyl)phosphonate (**16a**)

20161116\_AZ28-Ac#14 RT: 0.11 AV: 1 NL: 6.75E7  
T: FTMS - p ESI Full ms [150.00-2000.00]

AZ28 - LTQ-Orbitrap - ESI+  
CH<sub>2</sub>Cl<sub>2</sub>+MeOH+0.1%Ac. Form.

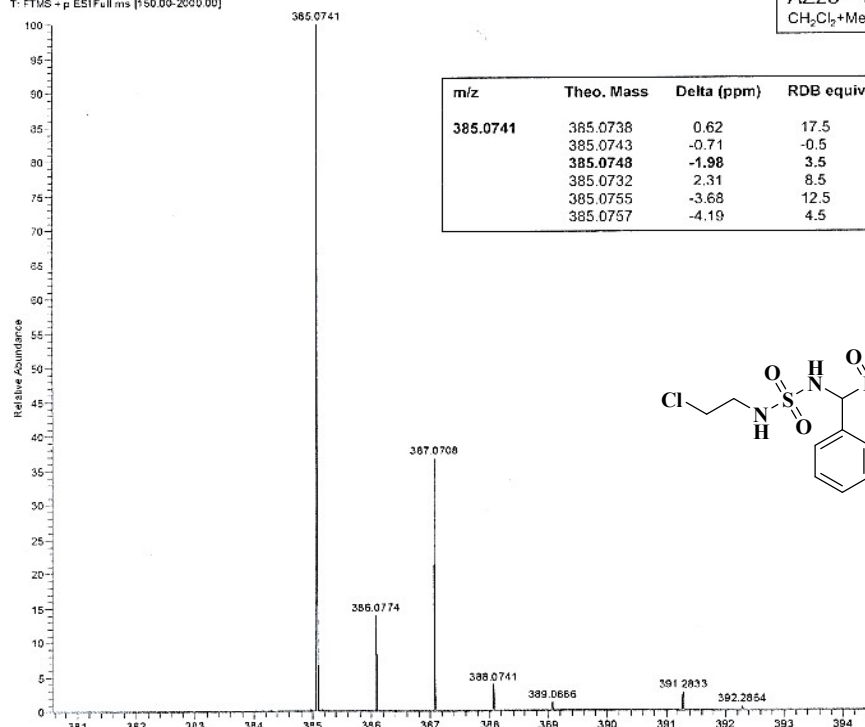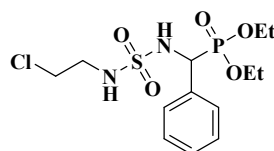

**MS Spectrum:** Diethyl (((N-(2-chloroethyl)sulfamoyl)amino)(phenyl)methyl)phosphonate (**16a**)

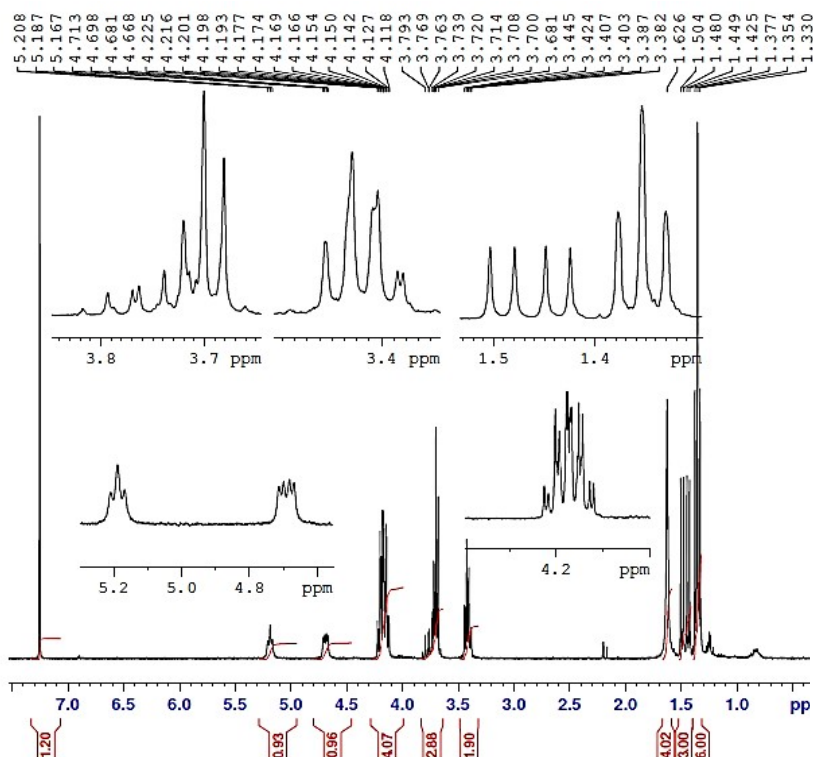

Current Data Parameters **AZ91**  
 NAME  
 EXPNO 10  
 PROCNO 1  
 F2 - Acquisition Parameters  
 Date\_ 20170527  
 Time 13.02  
 INSTRUM spect  
 PROBRD 5 mm PABBO BB-  
 FULPROG zg30  
 TD 49152  
 SOLVENT CDCl3  
 NS 8  
 DS 2  
 SWH 6172.839 Hz  
 FIDRES 0.125587 Hz  
 AQ 3.9813120 sec  
 RG 1149.4  
 DW 81.000 usec  
 DE 6.50 usec  
 TE 298.3 K  
 D1 1.0000000 sec  
 TDO 1  
 ===== CHANNEL f1 =====  
 NUC1 1H  
 P1 7.70 usec  
 PL1 2.00 dB  
 SFO1 300.1310534 MHz  
 F2 - Processing parameters  
 SI 65536  
 SP 300.1300081 MHz  
 WDW EM  
 SSB 0  
 LB 0.30 Hz  
 GB 0  
 PC 1.00

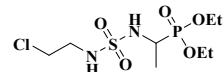

**<sup>1</sup>H NMR Spectrum:** Diethyl (1-((N-(2-chloroethyl)sulfamoyl)amino)ethyl)phosphonate (**16b**)

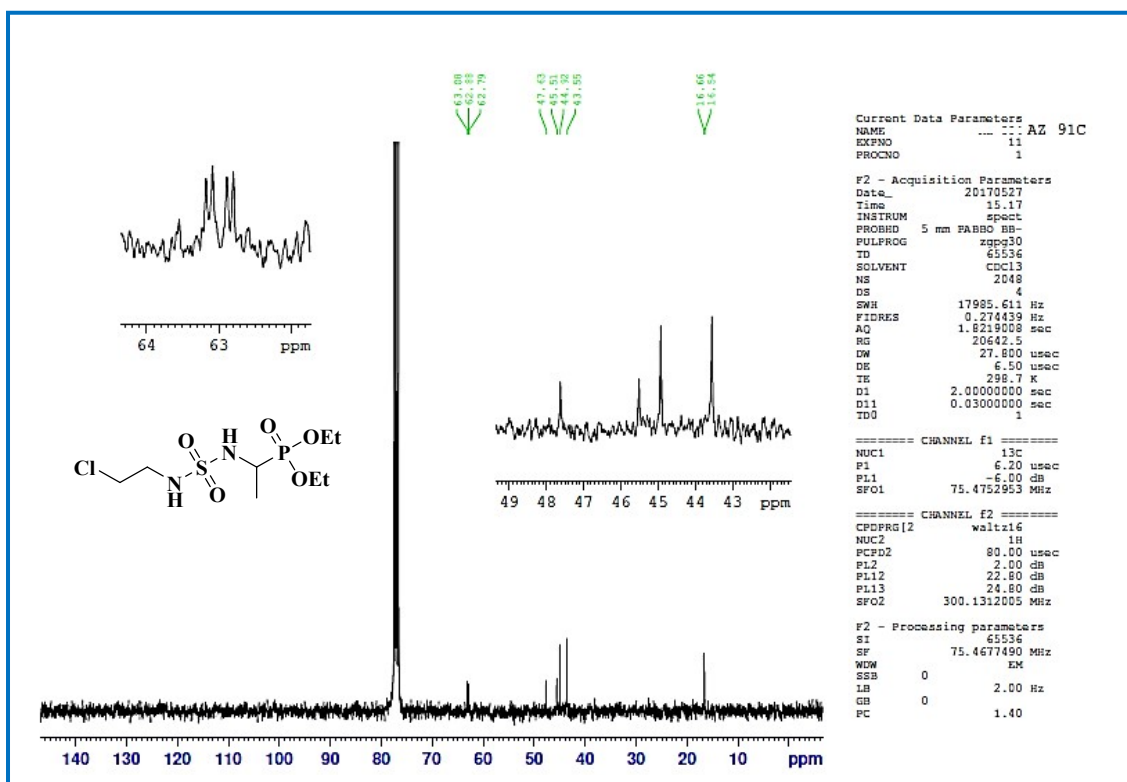

**<sup>13</sup>C NMR Spectrum:** Diethyl (1-((N-(2-chloroethyl)sulfamoyl)amino)ethyl)phosphonate (16b)

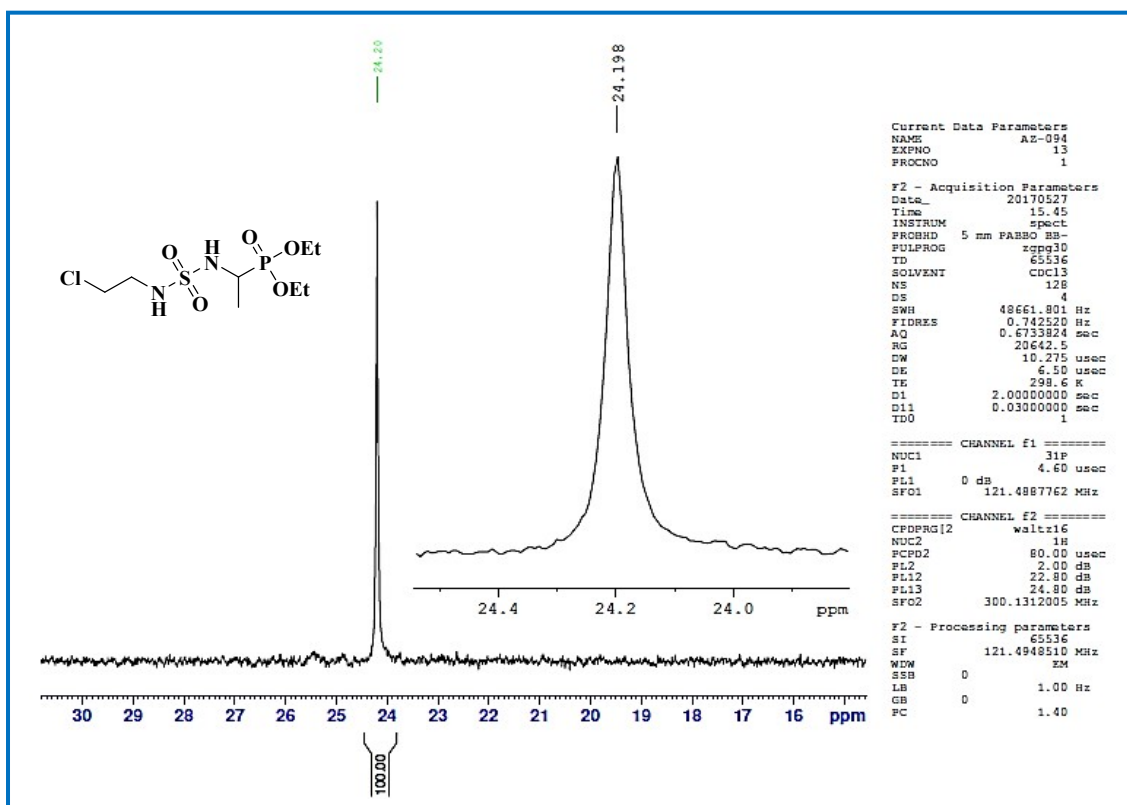

**<sup>31</sup>P NMR Spectrum:** Diethyl (1-((N-(2-chloroethyl)sulfamoyl)amino)ethyl)phosphonate (16b)

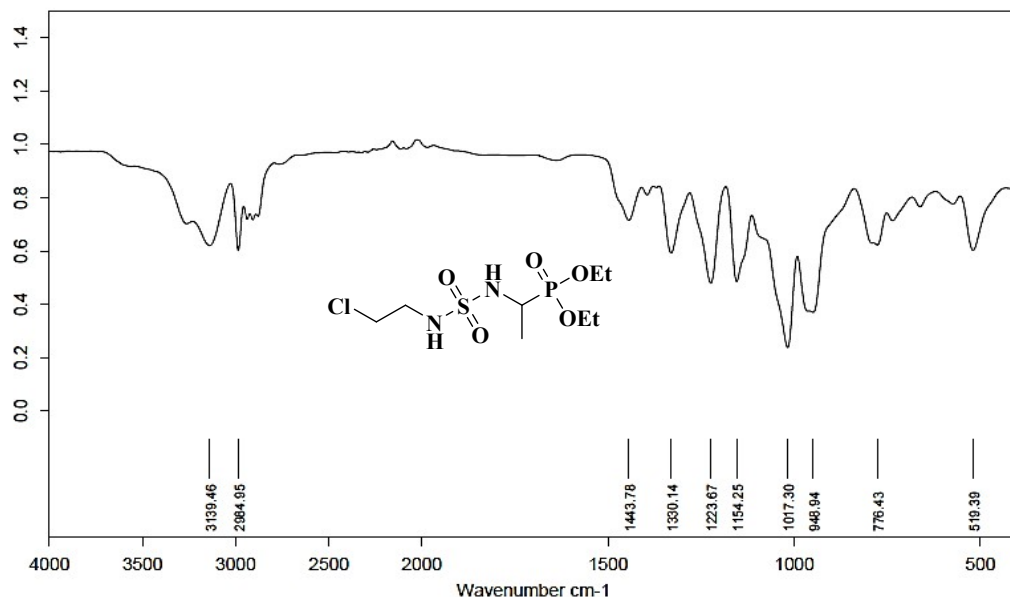

D:\DATA\CEISAM\SYMBIOSE\Aouf Z\AZ91.0

AZ91

ATR

10/04/2017

**IR Spectrum:** Diethyl (1-((N-(2-chloroethyl)sulfamoyl)amino)ethyl)phosphonate (16b)

AZ91 (MeOH) - H<sub>2</sub>O/MeOH/AF (50%/50%/0.1%)  
20170331\_AZ91\_01 9 (0.209) Cm (7:10)

XEVO G2-XS QTOF

31-Mar-2017  
1: TOF MS ES+  
4.74e6

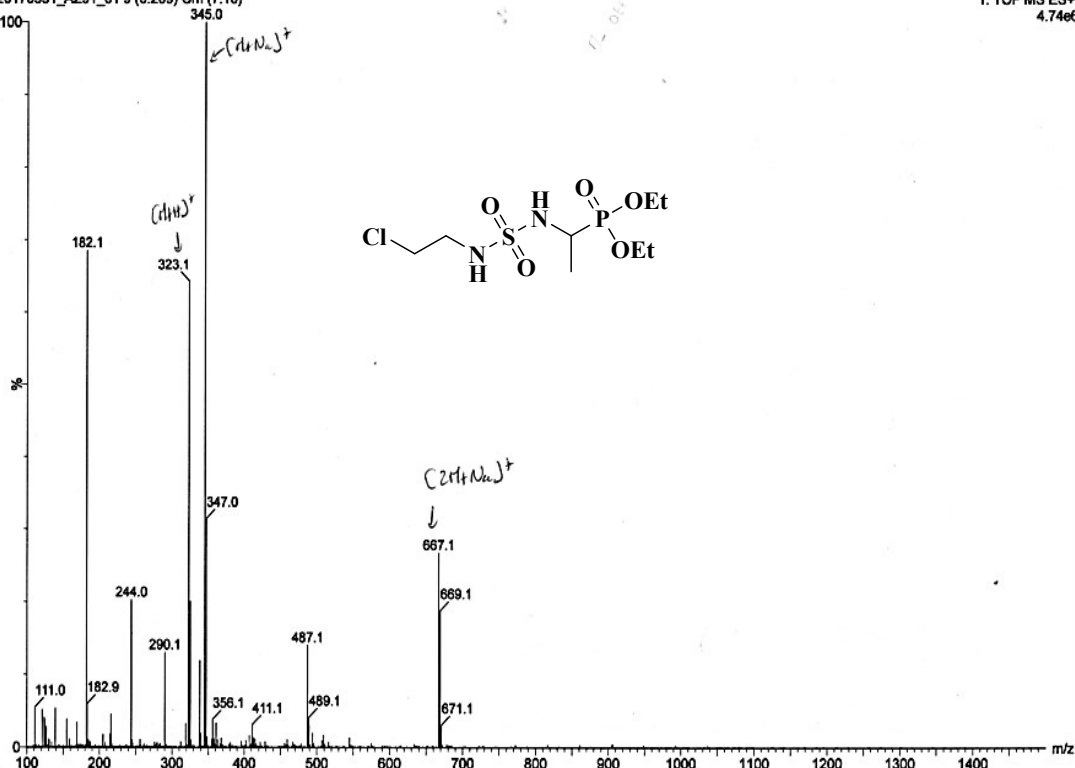

**MS Spectrum:** Diethyl (1-((N-(2-chloroethyl)sulfamoyl)amino)ethyl)phosphonate (16b)

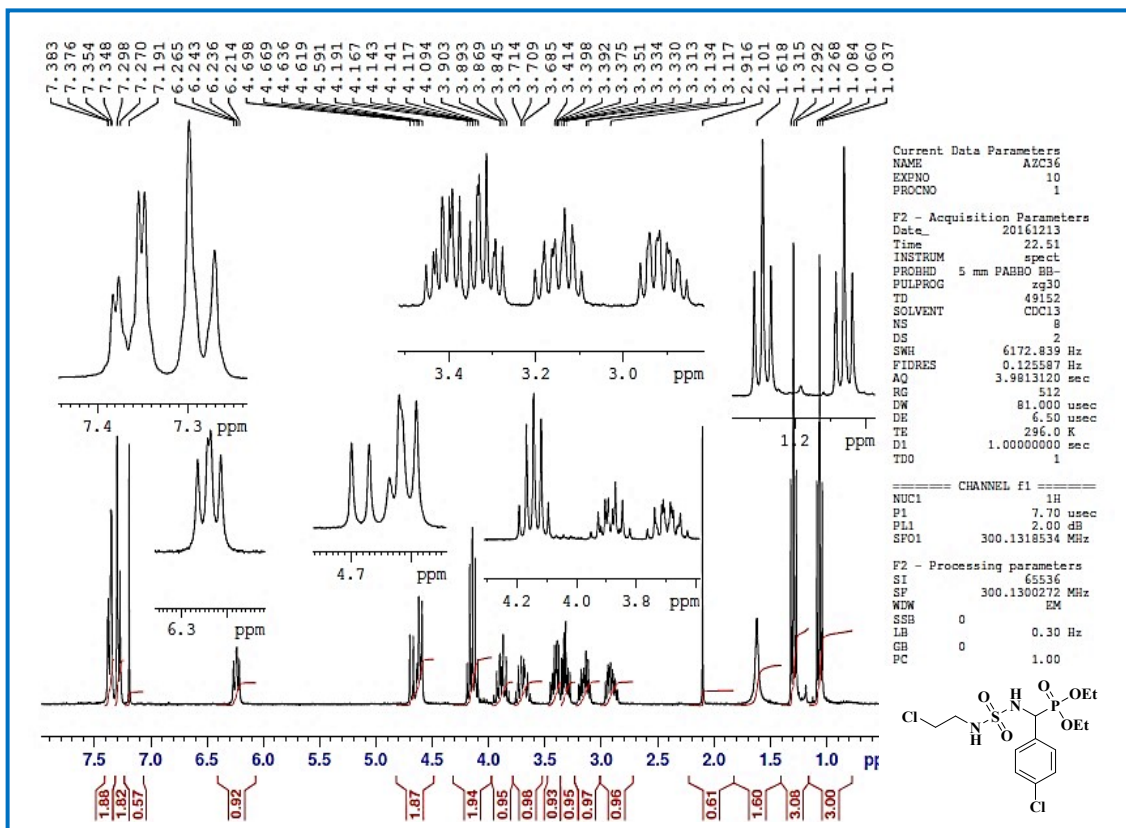

**<sup>1</sup>H NMR Spectrum:** Diethyl (((N-(2-chloroethyl)sulfamoyl)amino)(4-chlorophenyl)methyl)phosphonate (**16c**)

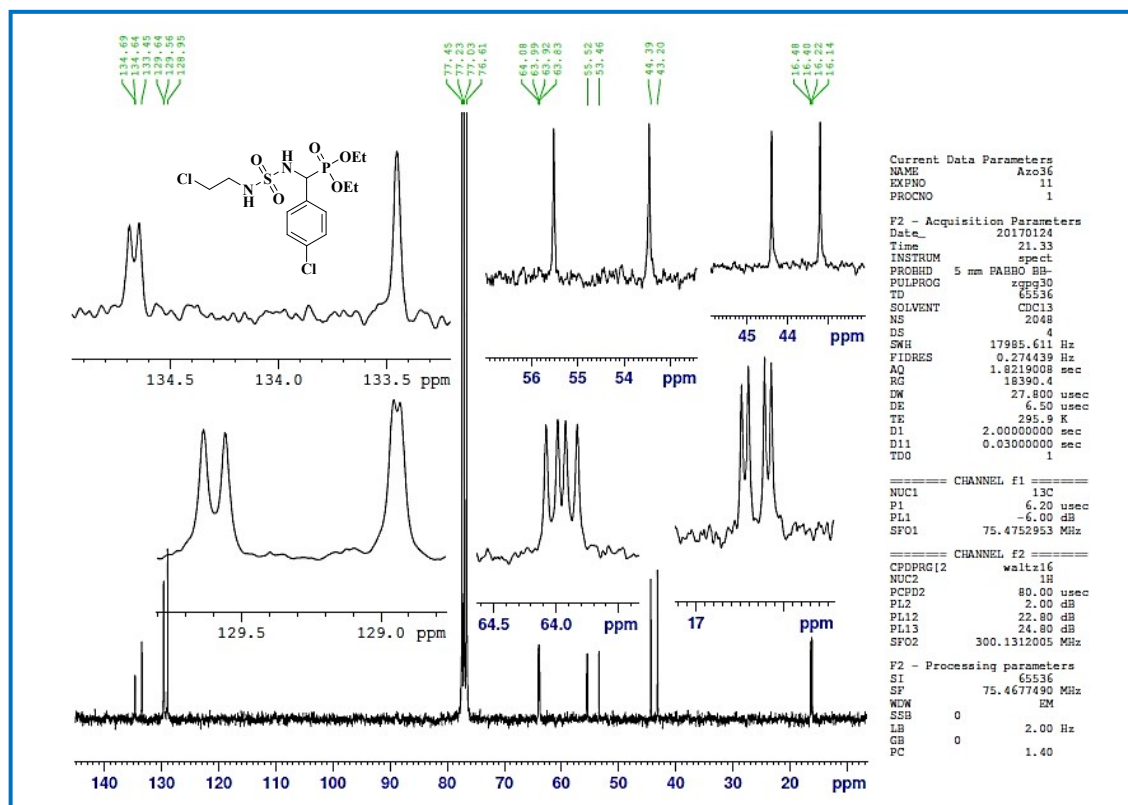

**<sup>13</sup>C NMR Spectrum:** Diethyl (((N-(2-chloroethyl)sulfamoyl)amino)(4-chlorophenyl)methyl)phosphonate (**16c**)

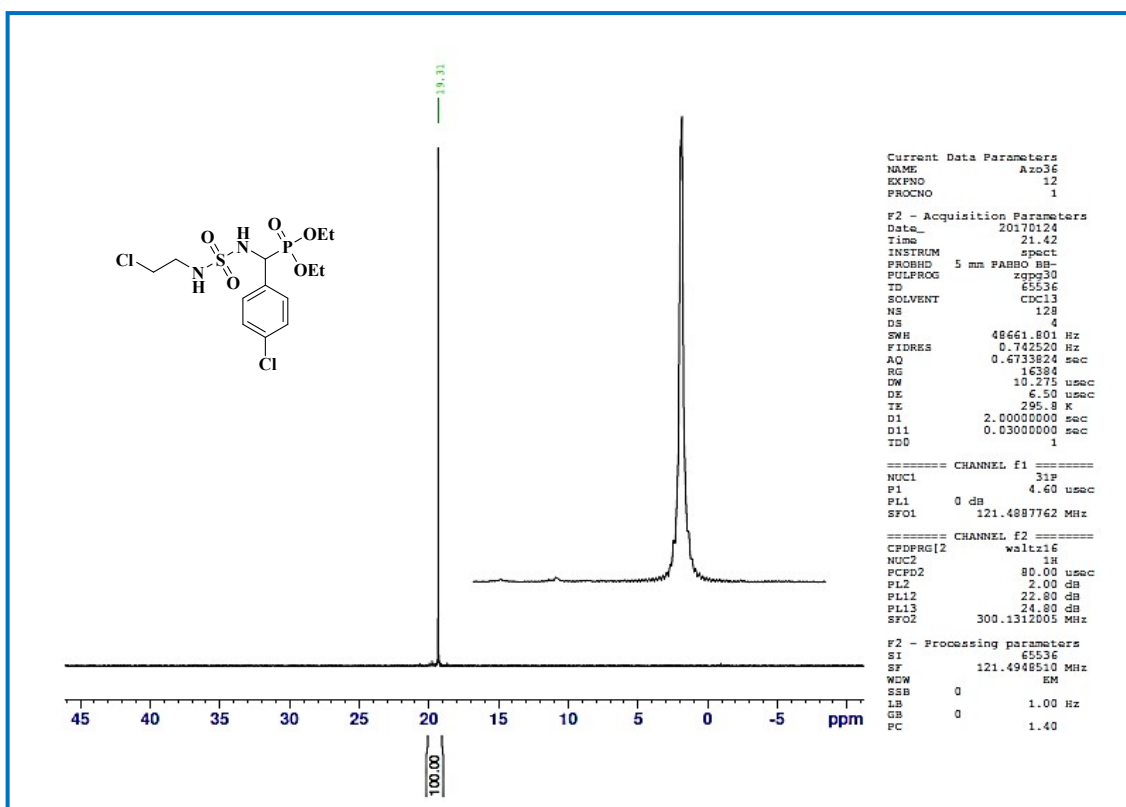

**<sup>31</sup>P NMR Spectrum:** Diethyl (((N-(2-chloroethyl)sulfamoyl)amino)(4-chlorophenyl)methyl)phosphonate (**16c**)

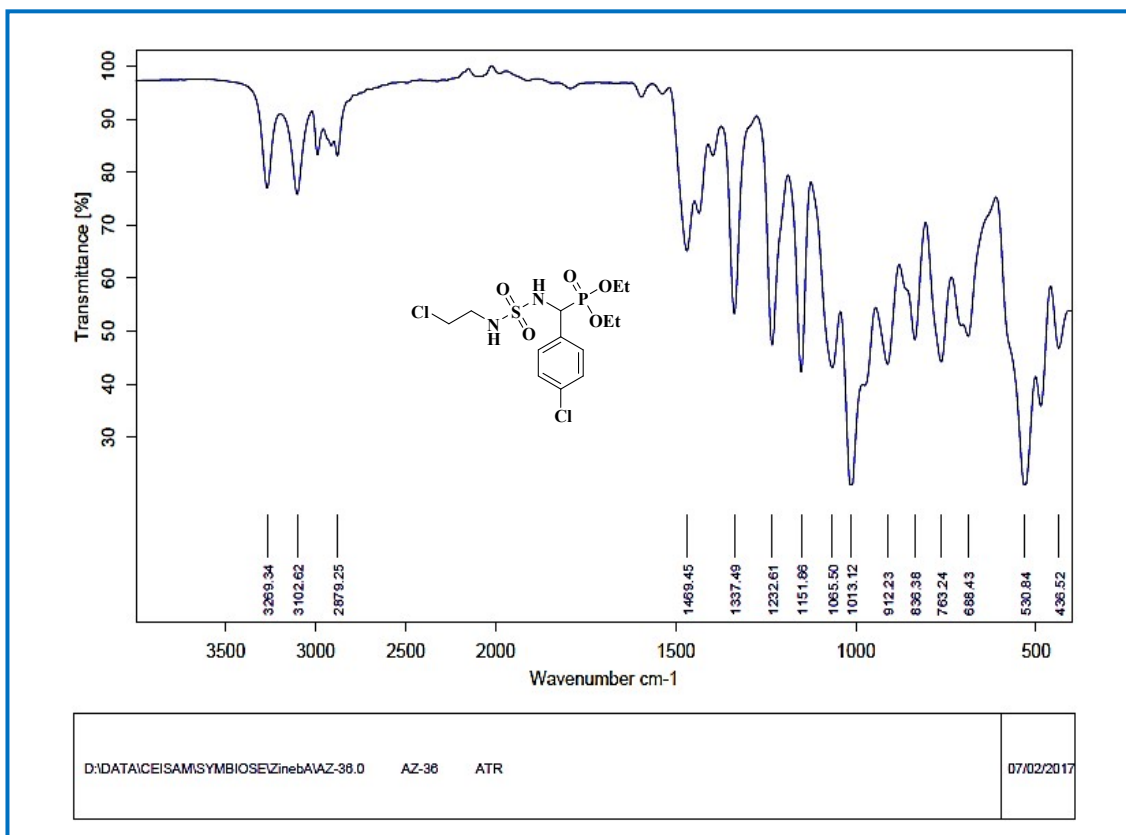

**IR Spectrum:** Diethyl (((N-(2-chloroethyl)sulfamoyl)amino)(4-chlorophenyl)methyl)phosphonate (**16c**)

AZ36 / MeOH - H2O/MeOH/AF (50/50/0.1%)  
20170201\_AZ36\_01 22 (0.448) Cm (22:24-2:8)

XEVO G2-XS QTOF

01-Feb-2017  
1: TOF MS ES+  
2.59e7

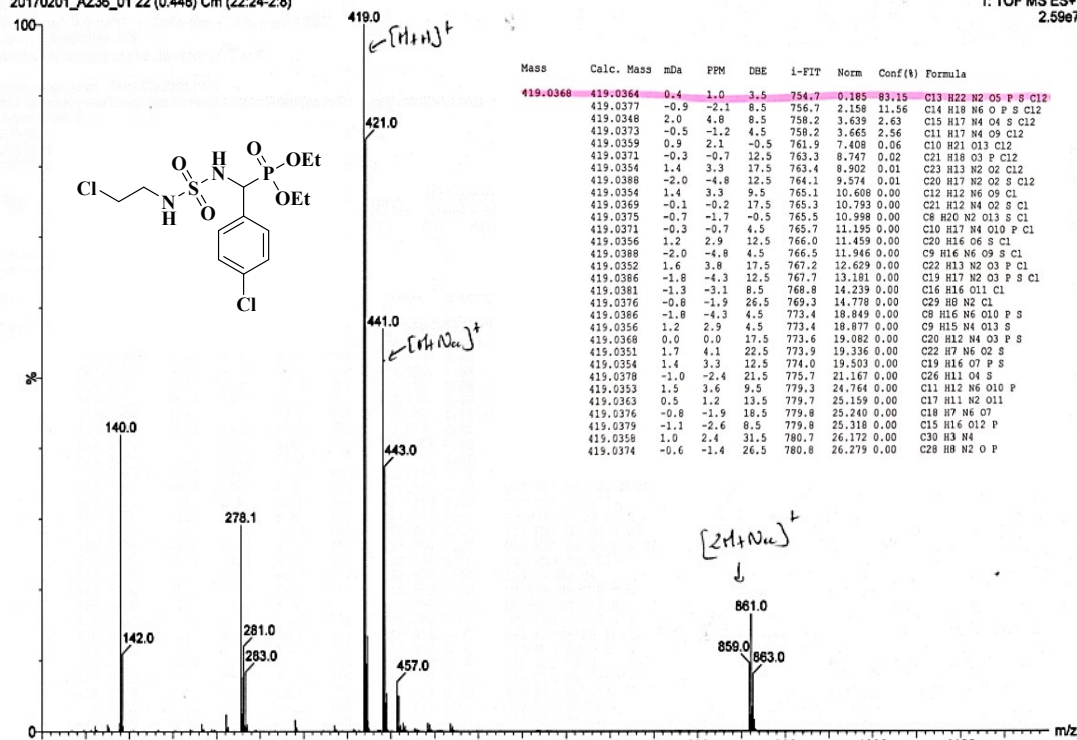

MS Spectrum: Diethyl (((N-(2-chloroethyl)sulfamoyl)amino)(4-chlorophenyl)methyl)phosphonate (16c)

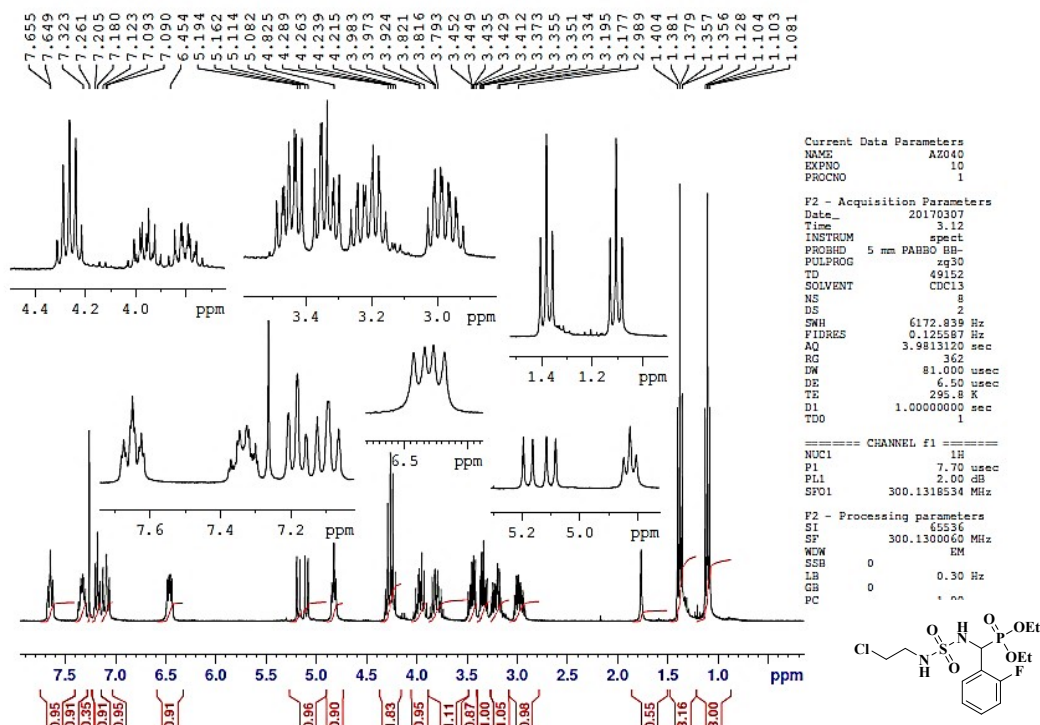

<sup>1</sup>H NMR Spectrum: Diethyl (((N-(2-chloroethyl)sulfamoyl)amino)(2-fluorophenyl)methyl)phosphonate (16d)

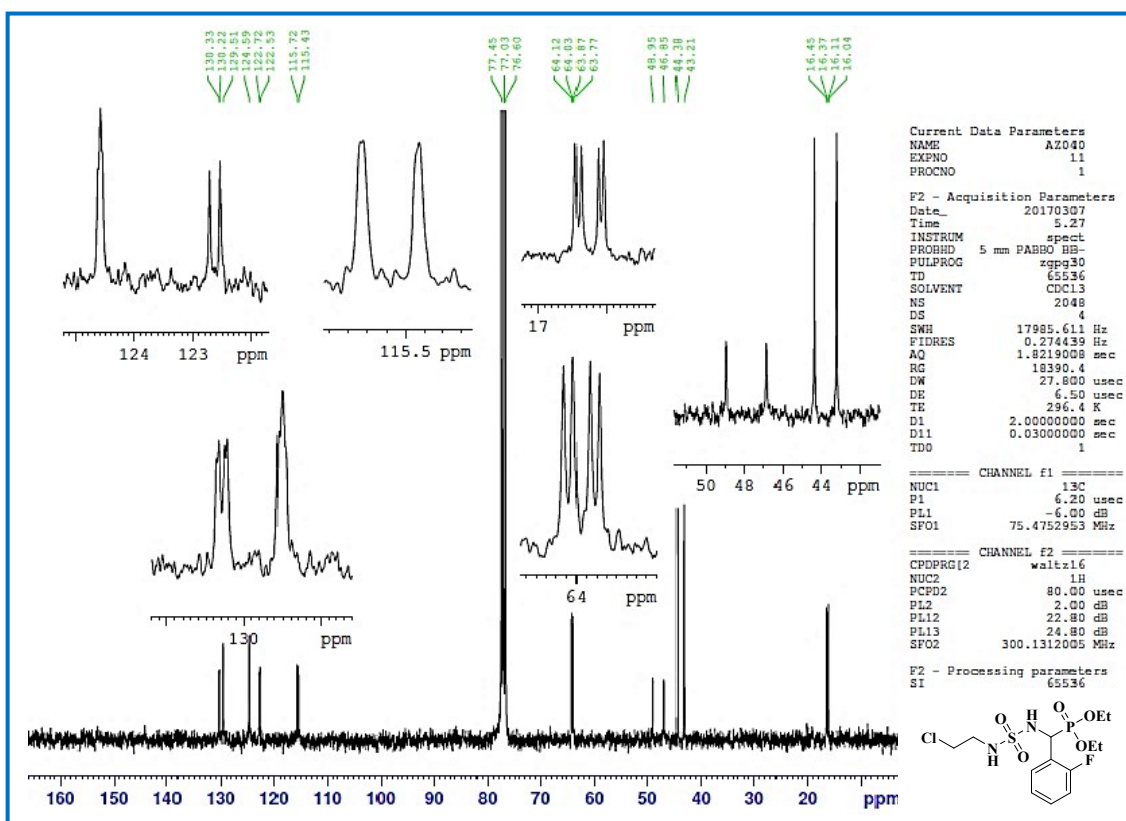

**<sup>13</sup>C NMR Spectrum:** Diethyl (((N-(2-chloroethyl)sulfamoyl)amino)(2-fluorophenyl)methyl)phosphonate (16d)

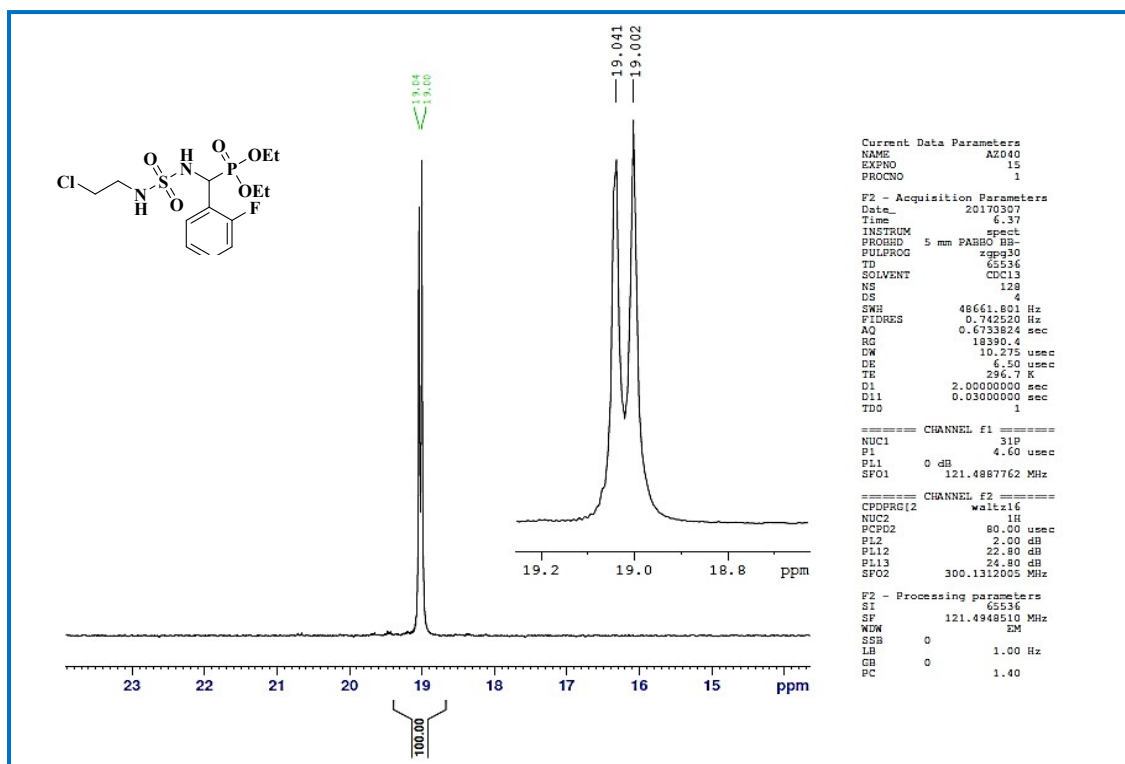

**<sup>31</sup>P NMR Spectrum:** Diethyl (((N-(2-chloroethyl)sulfamoyl)amino)(2-fluorophenyl)methyl)phosphonate (16d)

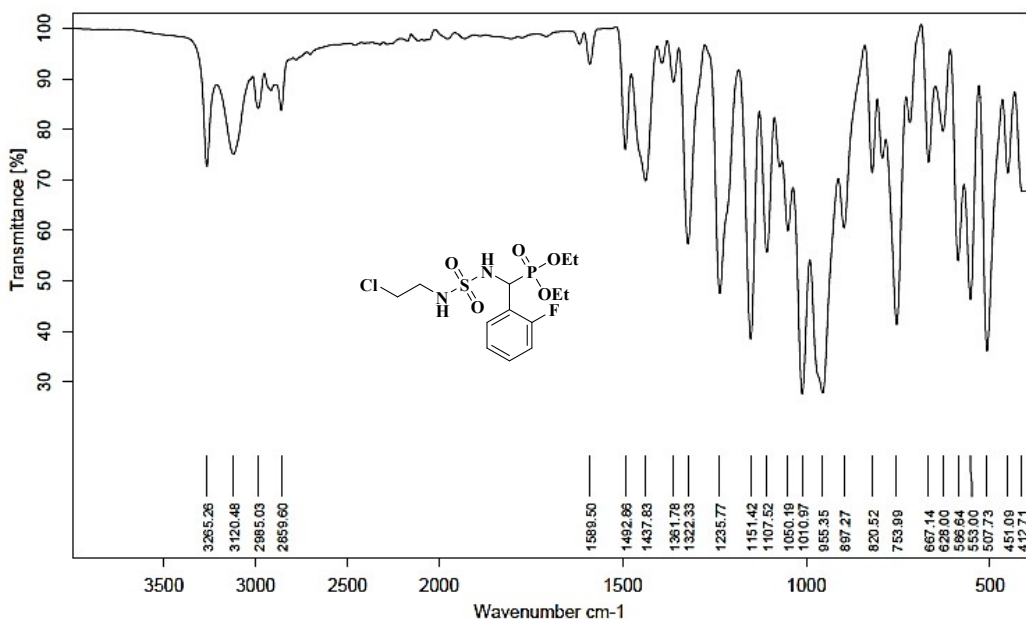

D:\DATA\CE\ISAM\SYMBIOSE\Zineb\AZ-40.0

AZ-40

ATR

07/02/2017

**IR Spectrum:** Diethyl (((N-(2-chloroethyl)sulfamoyl)amino)(2-fluorophenyl)methyl)phosphonate (16d)

AZ40 / MeOH - H2O/MeOH/AF (50/50/0.1%)  
20170201\_AZ40\_01 23 (0.465) Cm (23.24-2.8)

XEVO G2-XS QTOF

01-Feb-2017  
1: TOF MS ES+  
2.53e7

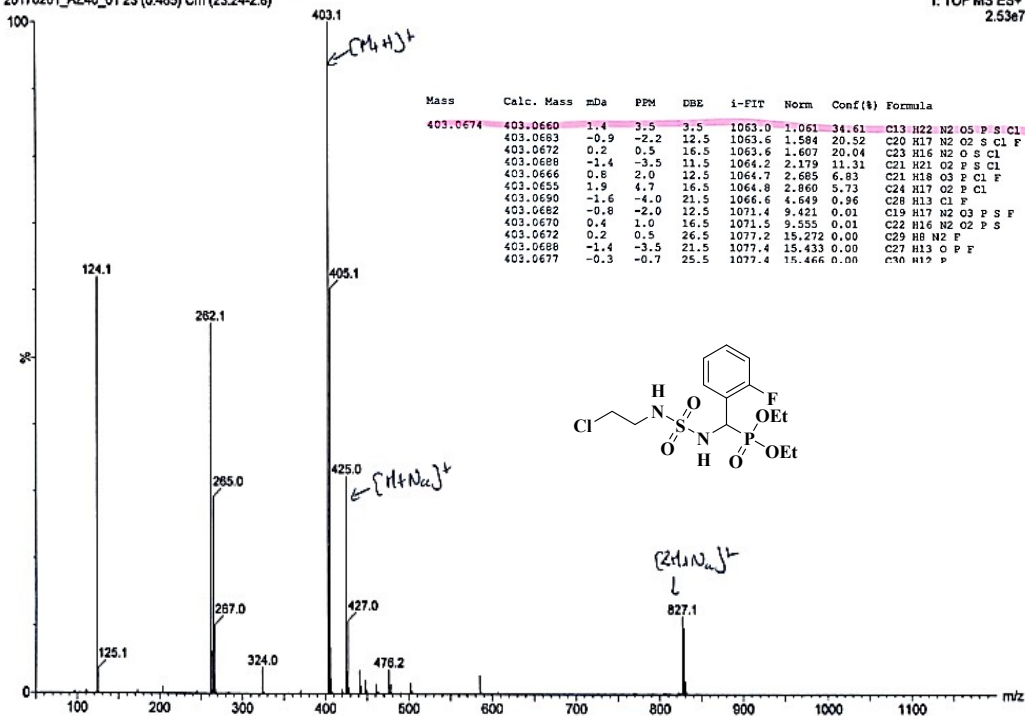

**MS Spectrum:** Diethyl (((N-(2-chloroethyl)sulfamoyl)amino)(2-fluorophenyl)methyl)phosphonate (16d)

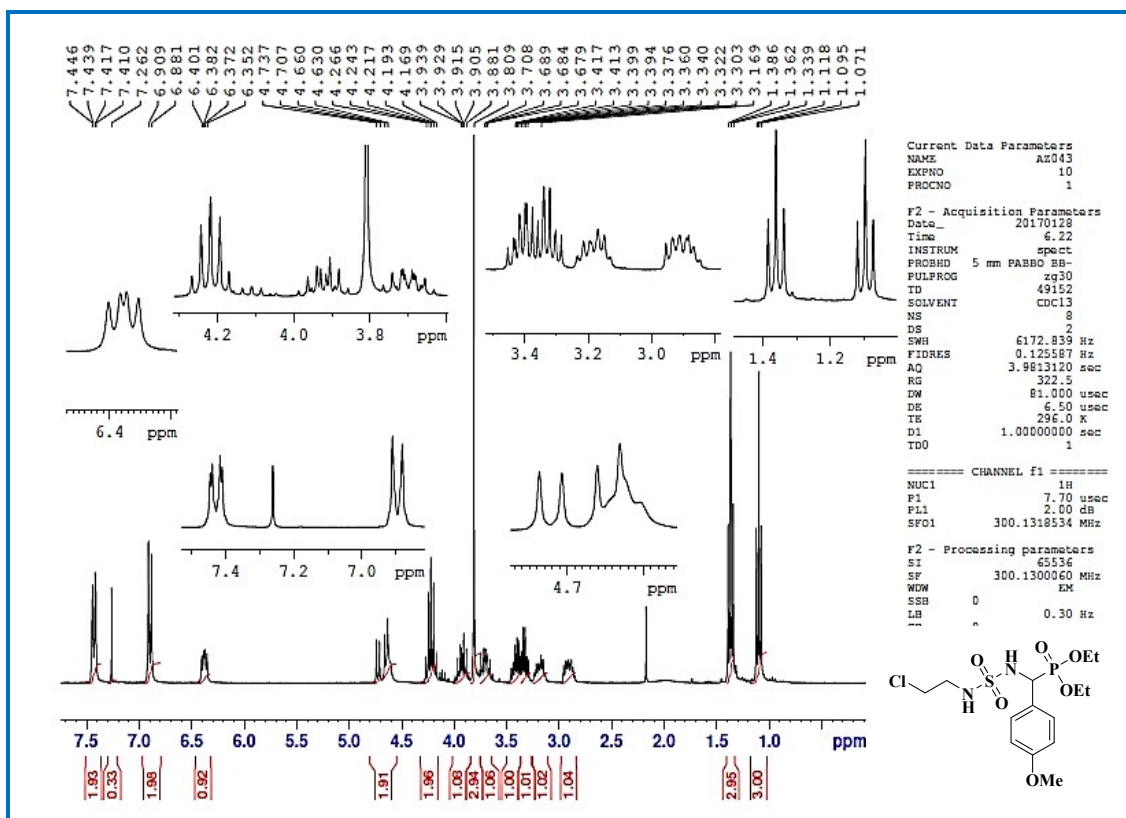

**<sup>1</sup>H NMR Spectrum:** Diethyl (((N-(2-chloroethyl)sulfamoyl)amino)(4-methoxyphenyl)methyl)phosphonate (16e)

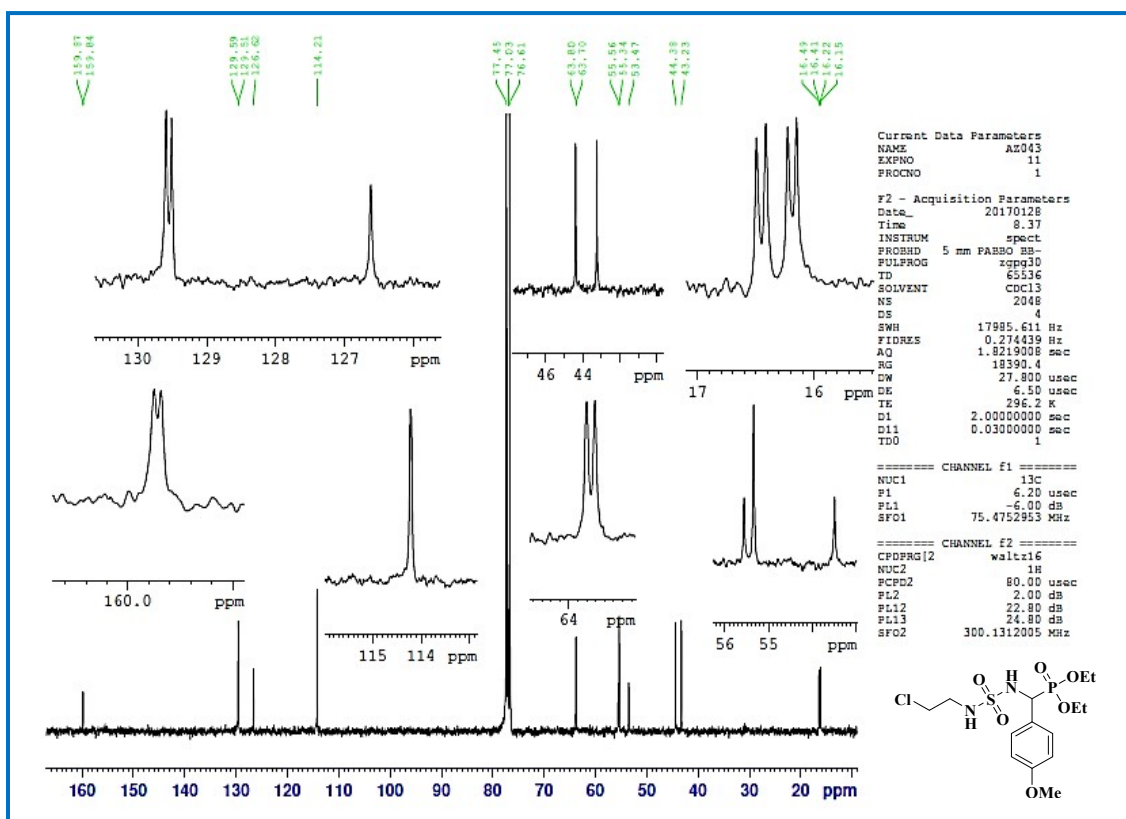

**<sup>13</sup>C NMR Spectrum:** Diethyl (((N-(2-chloroethyl)sulfamoyl)amino)(4-methoxyphenyl)methyl)phosphonate (16e)

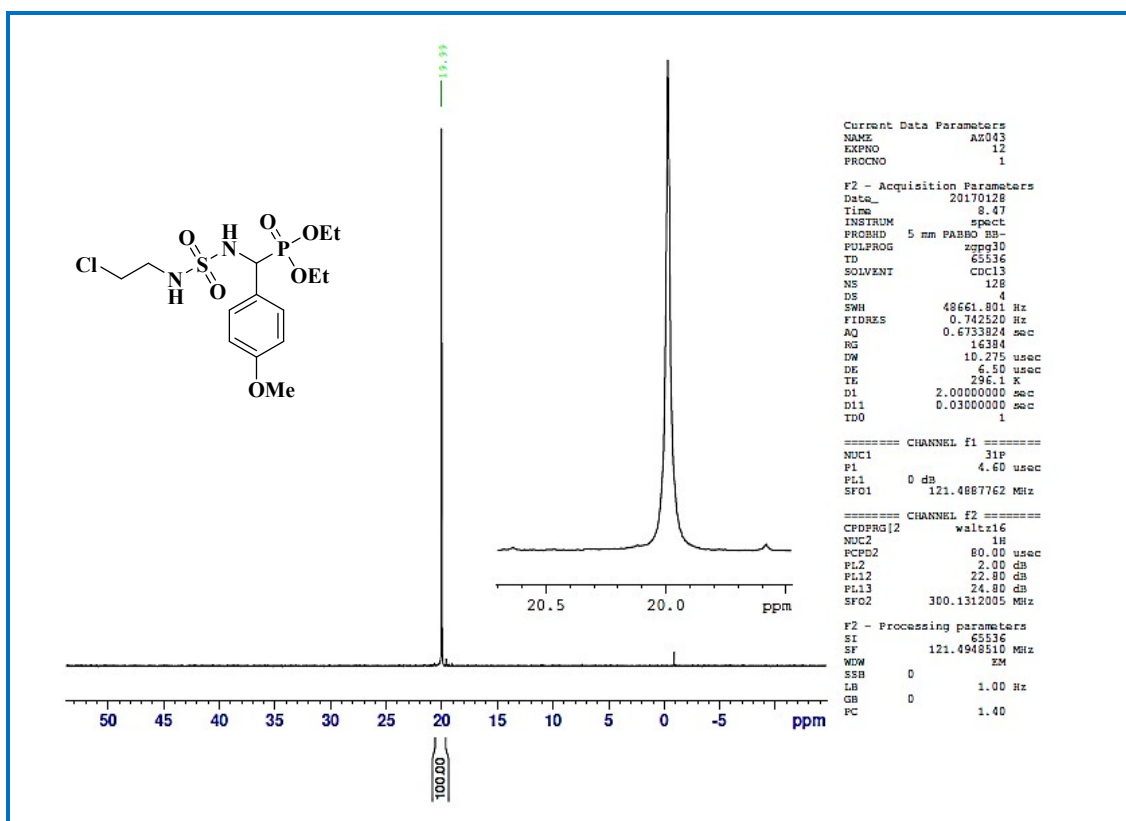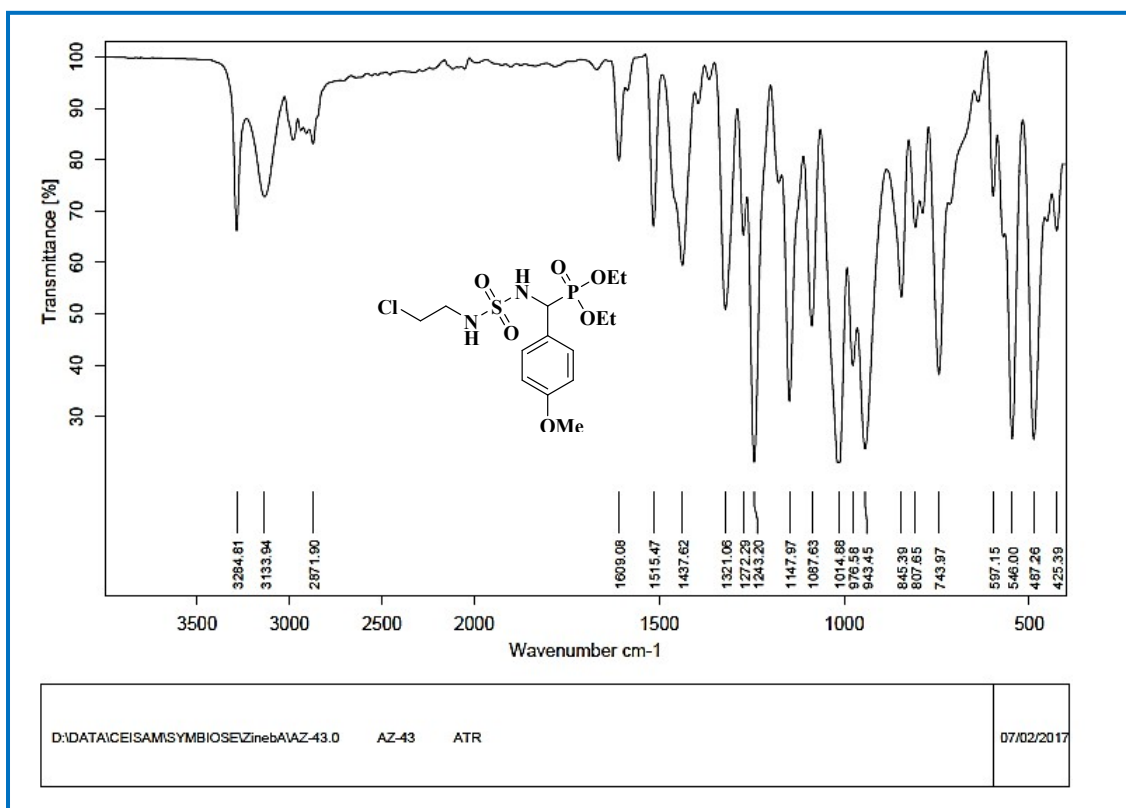

**IR Spectrum:** Diethyl (((N-(2-chloroethyl)sulfamoyl)amino)(4-methoxyphenyl)methyl)phosphonate (16e)

AZ43 / MeOH - H2O/MeOH/AF (50/50/0.1%)  
20170201\_AZ43\_01 19 (0.397) Cm (17:19-2:8)

XEVO G2-XS QTOF

01-Feb-2017  
1: TOF MS ES+  
3.73e7

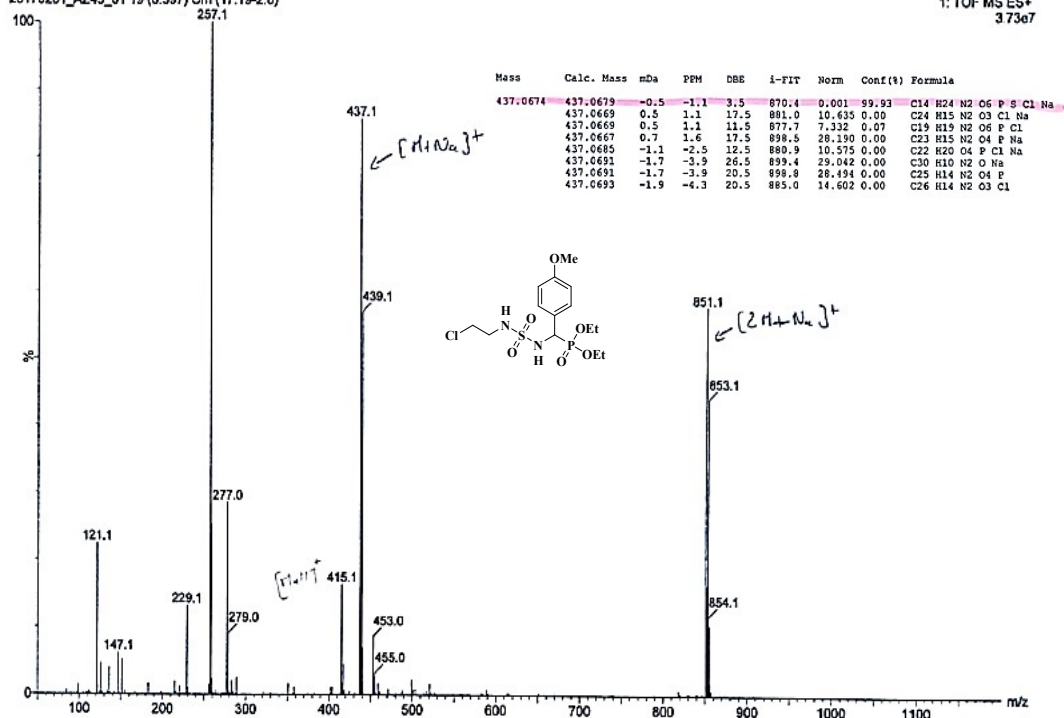

**MS Spectrum:** Diethyl (((N-(2-chloroethyl)sulfamoyl)amino)(4-methoxyphenyl)methyl)phosphonate (**16e**)

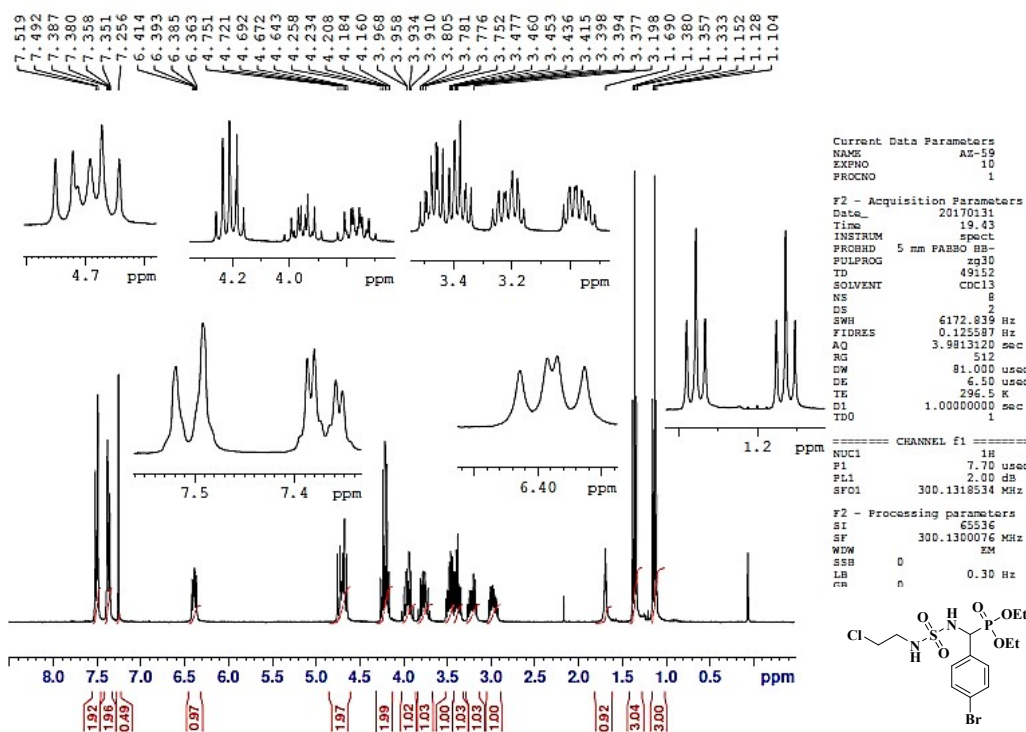

**<sup>1</sup>H NMR Spectrum:** Diethyl ((4-bromophenyl)((N-(2-chloroethyl)sulfamoyl)amino)methyl)phosphonate (**16f**)

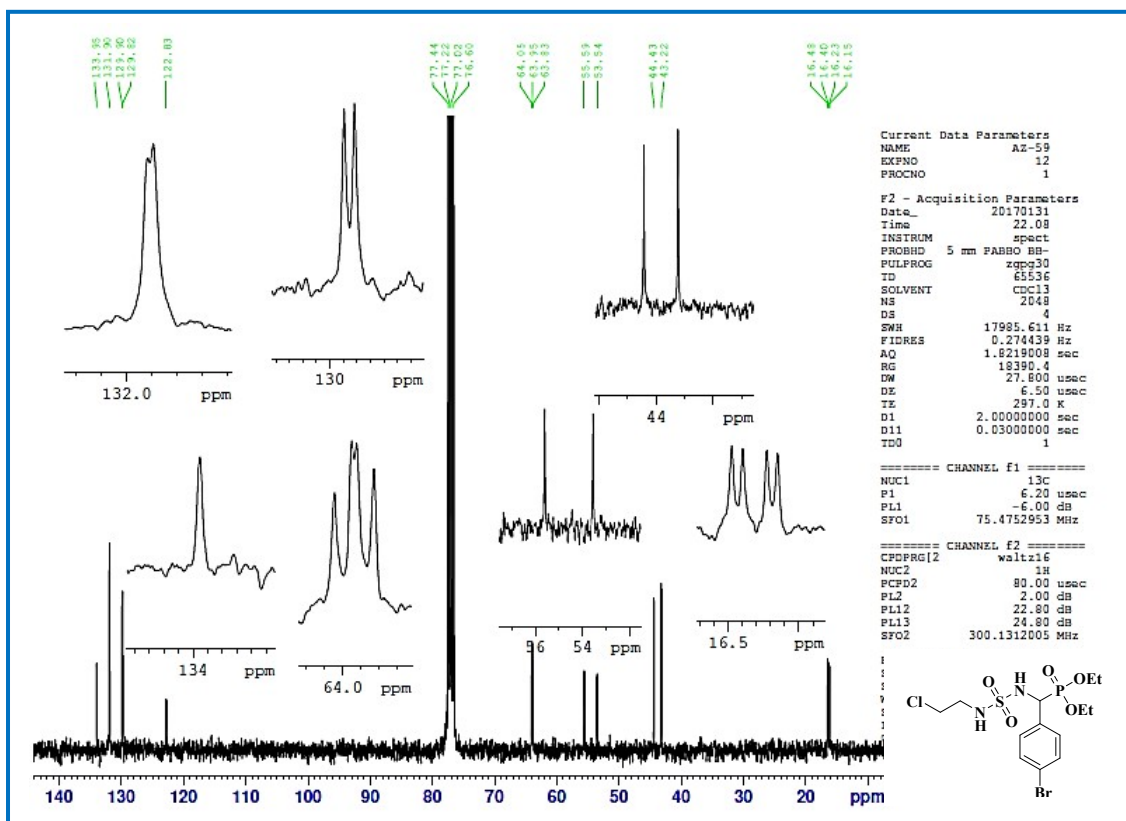

**<sup>13</sup>C NMR Spectrum:** Diethyl ((4-bromophenyl)((N-(2-chloroethyl)sulfamoyl)amino)methyl)phosphonate (16f)

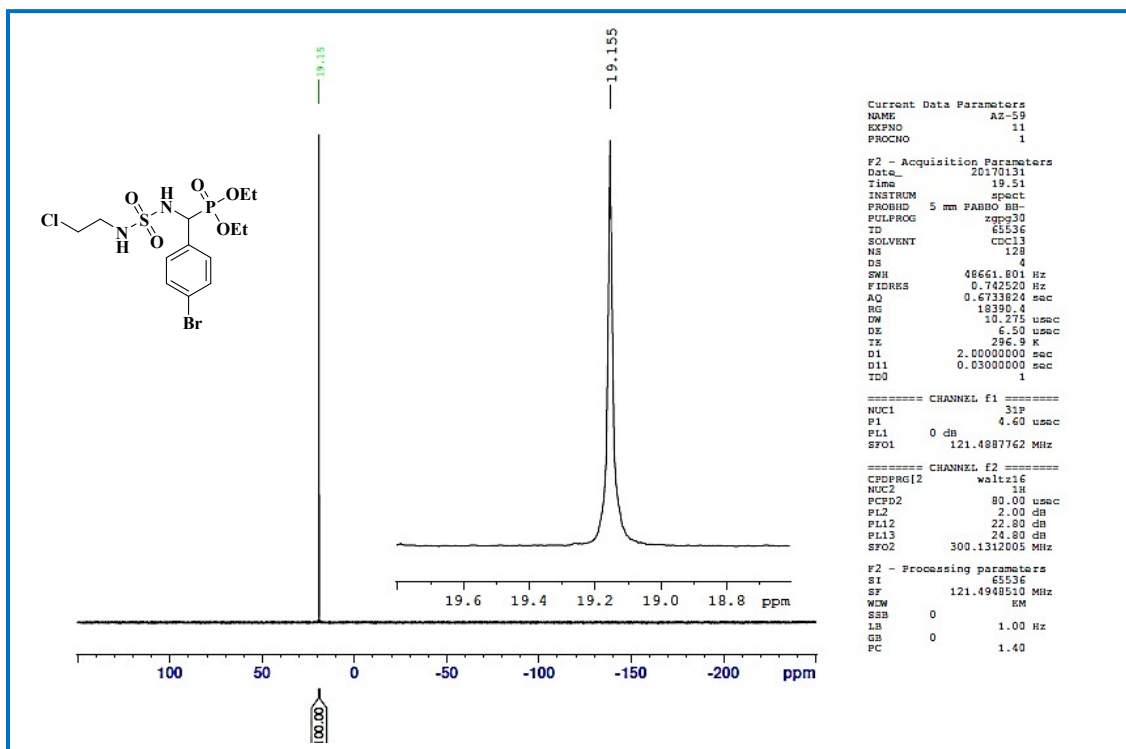

**<sup>31</sup>P NMR Spectrum:** Diethyl ((4-bromophenyl)((N-(2-chloroethyl)sulfamoyl)amino)methyl)phosphonate (16f)

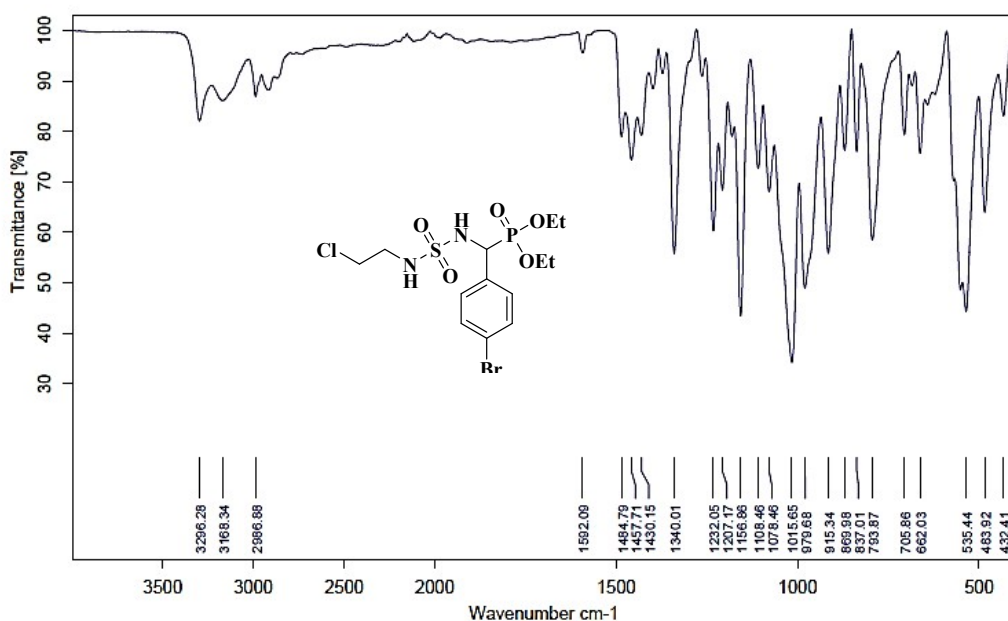

D:\DATA\CEISAM\SYMBIOSE\Zineb\IAZ-56.0 AZ-56 ATR

07/02/2017

**IR Spectrum:** Diethyl ((4-bromophenyl)((N-(2-chloroethyl)sulfamoyl)amino)methyl)phosphonate (**16f**)

AZ56 / DCM - H2O/MeOH/AF (50/50/0.1%)  
20170203\_AZ56 20 (0.414) Cm (17:20)

XEVO G2-XS QTOF

03-Feb-2017  
1: TOF MS ES+  
2.18e7

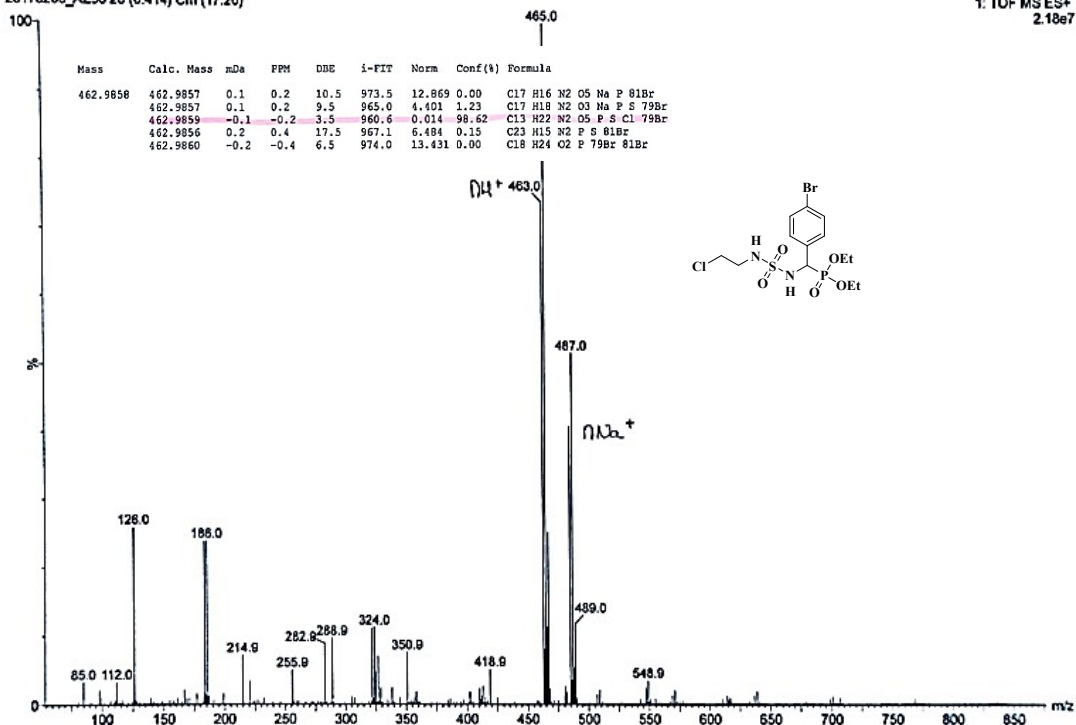

**MS Spectrum:** Diethyl ((4-bromophenyl)((N-(2-chloroethyl)sulfamoyl)amino)methyl)phosphonate (**16f**)

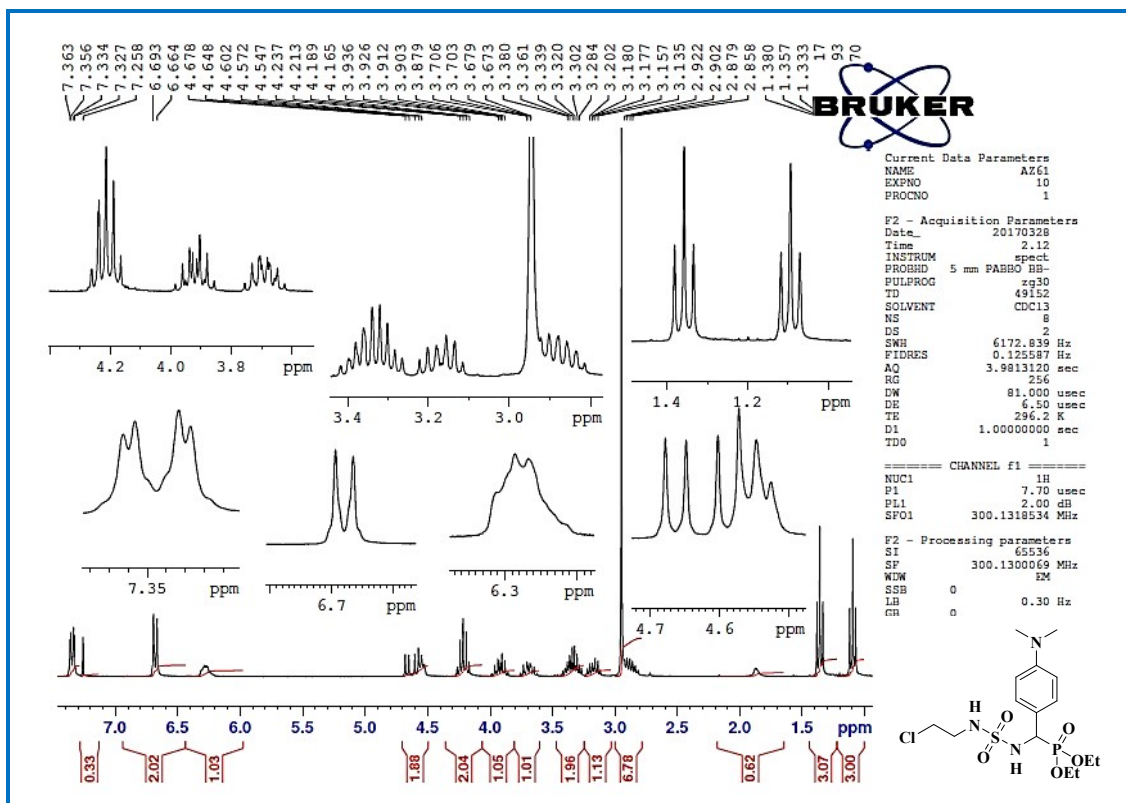

**<sup>1</sup>H NMR Spectrum:** Diethyl (((N-(2-chloroethyl)sulfamoyl)amino)(4-(dimethylamino)phenyl)methyl)phosphonate (**16g**)

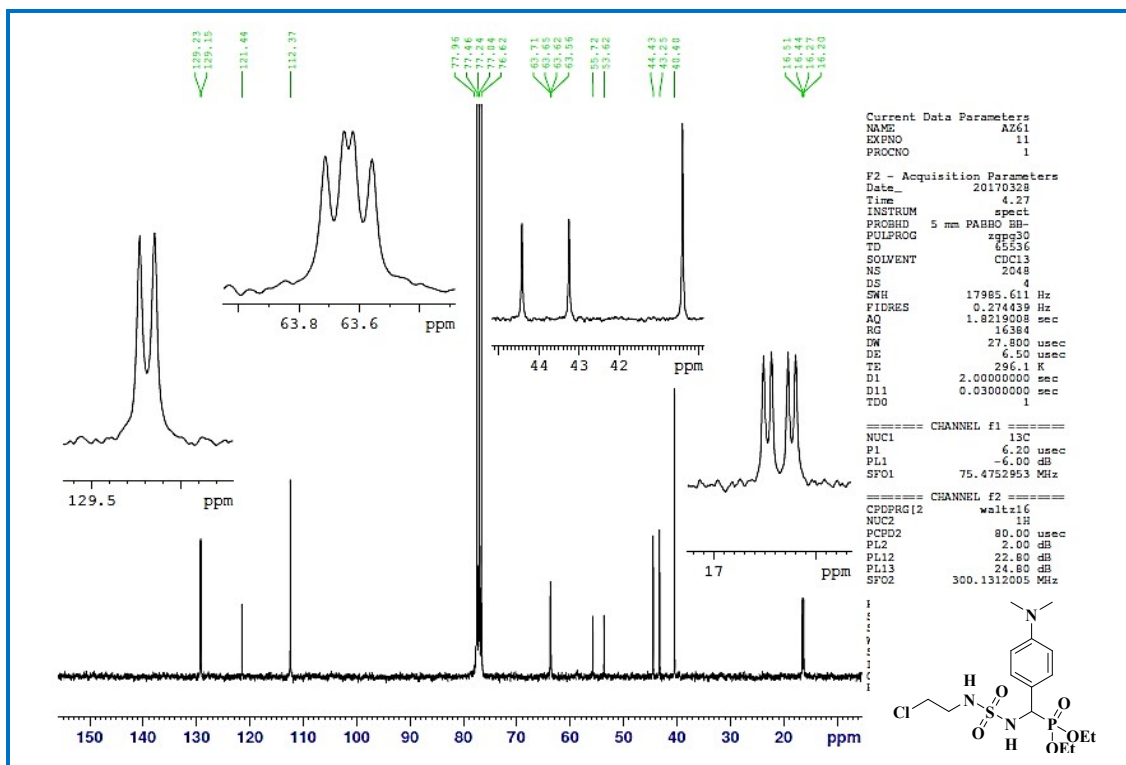

**<sup>13</sup>C NMR Spectrum:** Diethyl (((N-(2-chloroethyl)sulfamoyl)amino)(4-(dimethylamino)phenyl)methyl)phosphonate (**16g**)

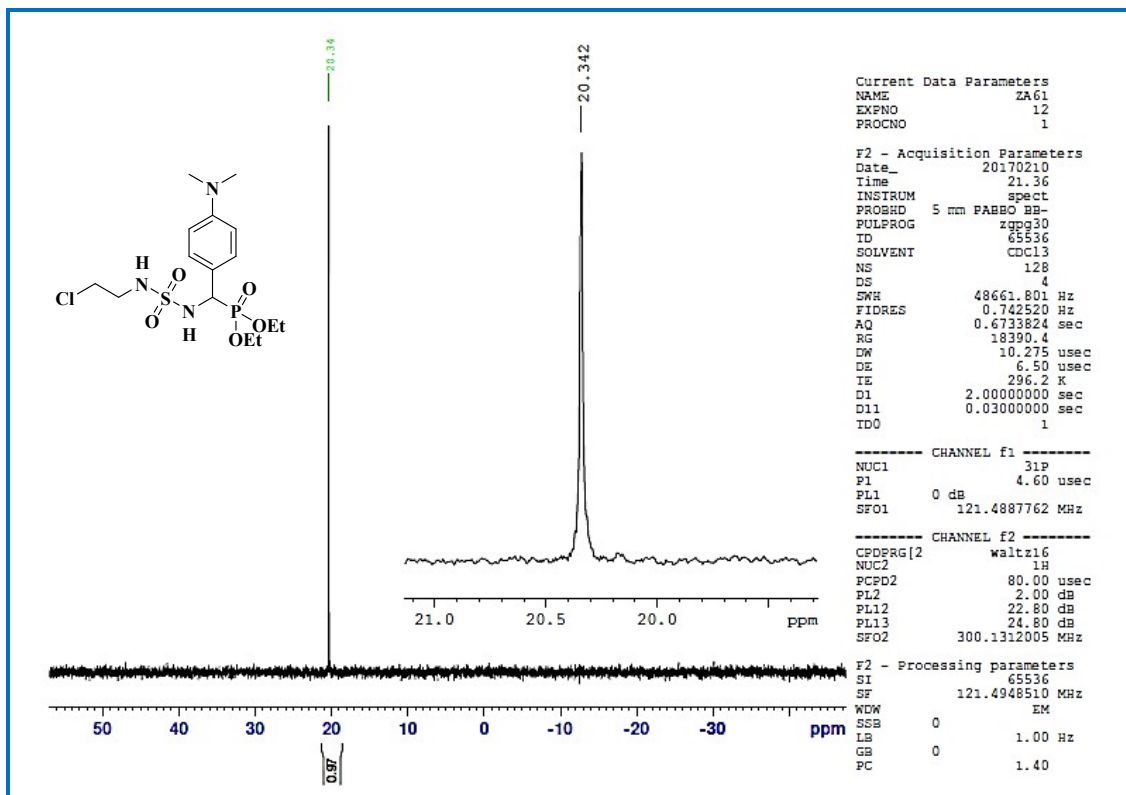

**<sup>31</sup>P NMR Spectrum:** Diethyl (((N-(2-chloroethyl)sulfamoyl)amino)(4-(dimethylamino)phenyl)methyl)phosphonate (**16g**)

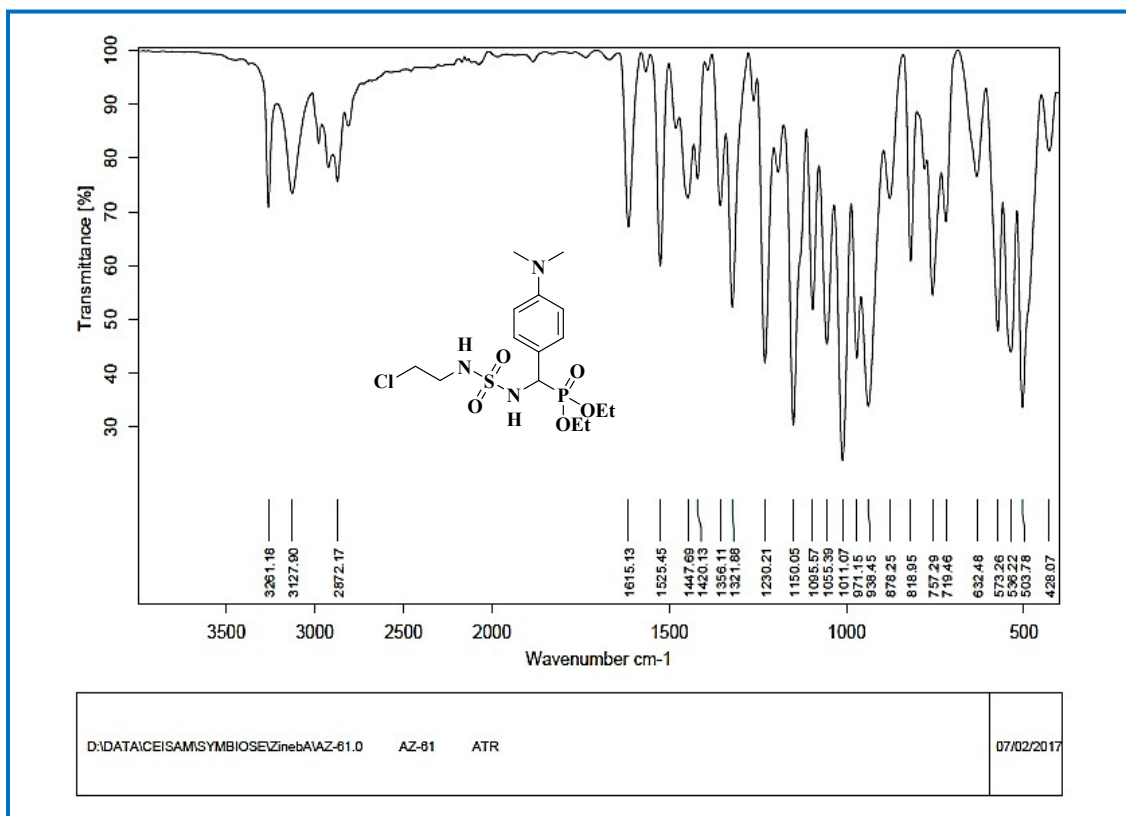

**IR Spectrum:** Diethyl (((N-(2-chloroethyl)sulfamoyl)amino)(4-(dimethylamino)phenyl)methyl)phosphonate (**16g**)

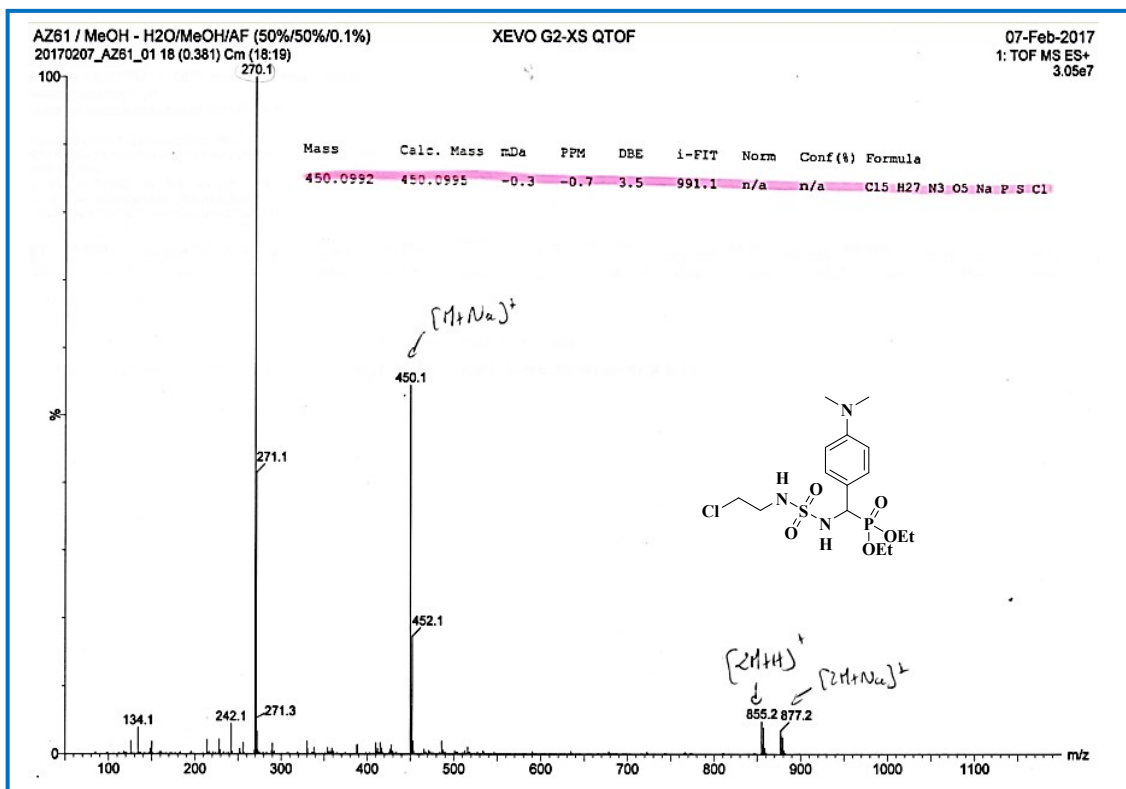

**MS Spectrum:** Diethyl (((N-(2-chloroethyl)sulfamoyl)amino)(4-(dimethylamino)phenyl)methyl)phosphonate (16g)

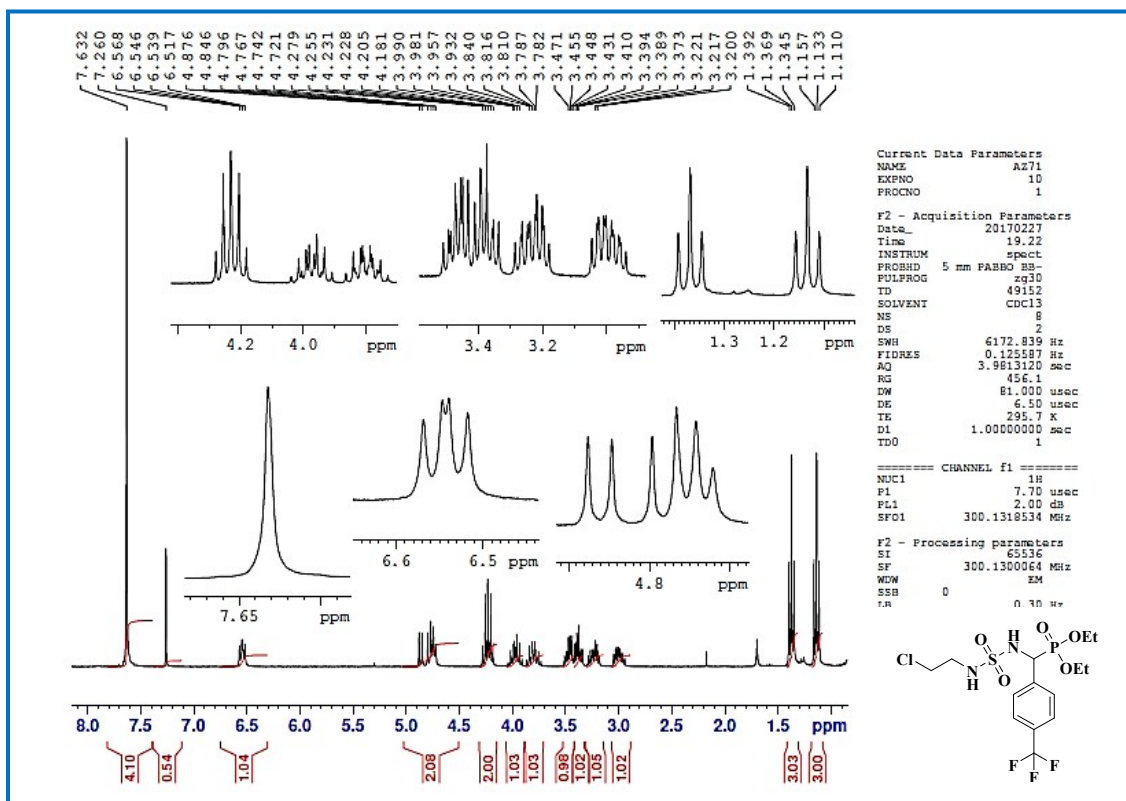

**<sup>1</sup>H NMR Spectrum:** Diethyl (((N-(2-chloroethyl)sulfamoyl)amino)(4-(trifluoromethyl)phenyl)methyl)phosphonate (16h)

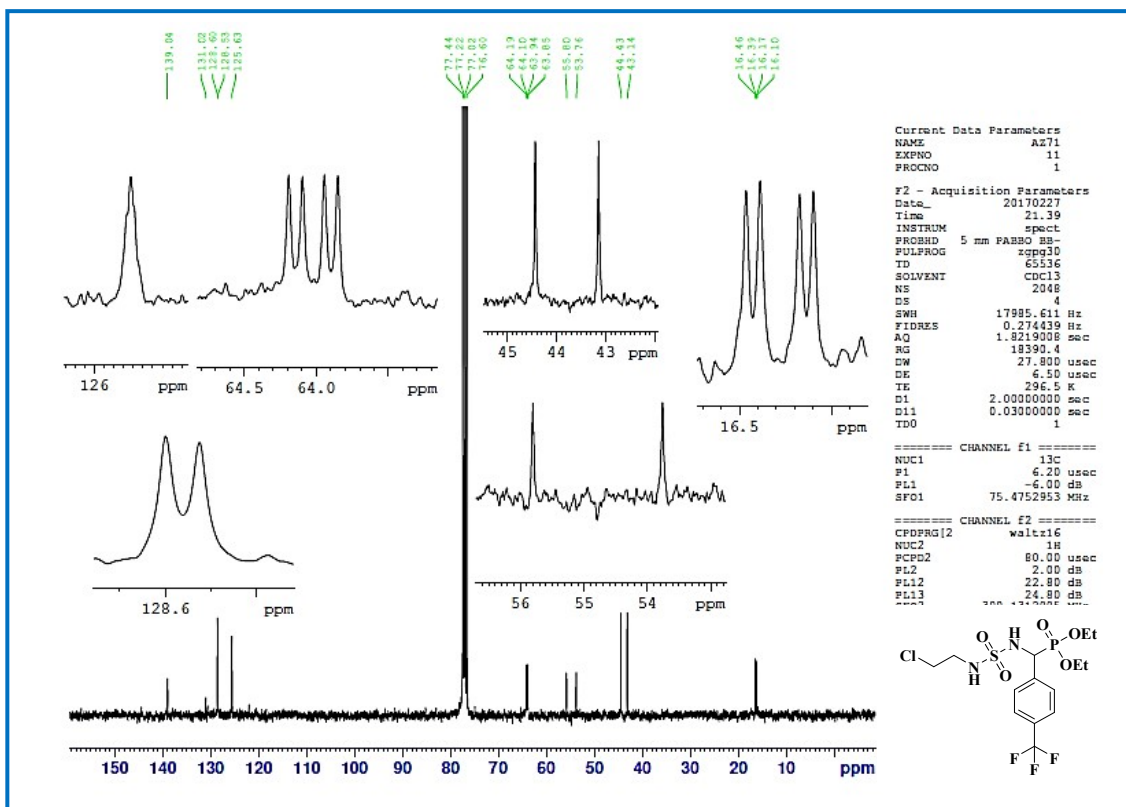

**<sup>13</sup>C NMR Spectrum:** Diethyl (((N-(2-chloroethyl)sulfamoyl)amino)(4-(trifluoromethyl)phenyl)methyl)phosphonate (**16h**)

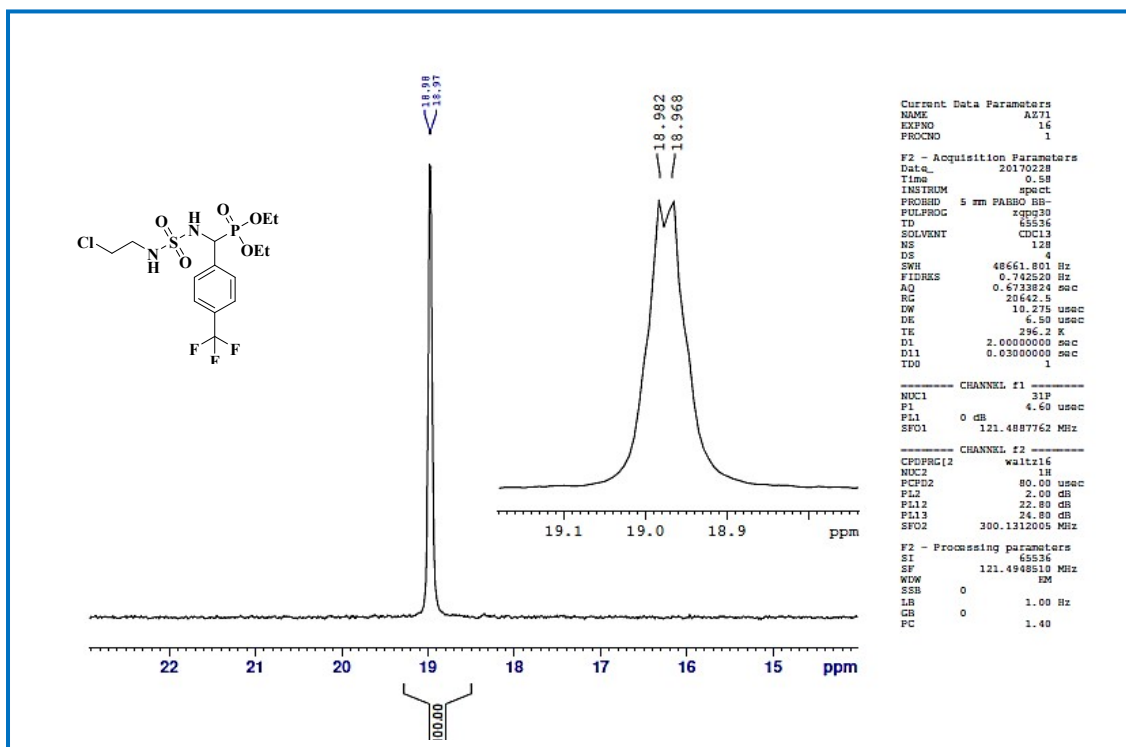

**<sup>31</sup>P NMR Spectrum:** Diethyl (((N-(2-chloroethyl)sulfamoyl)amino)(4-(trifluoromethyl)phenyl)methyl)phosphonate (**16h**)

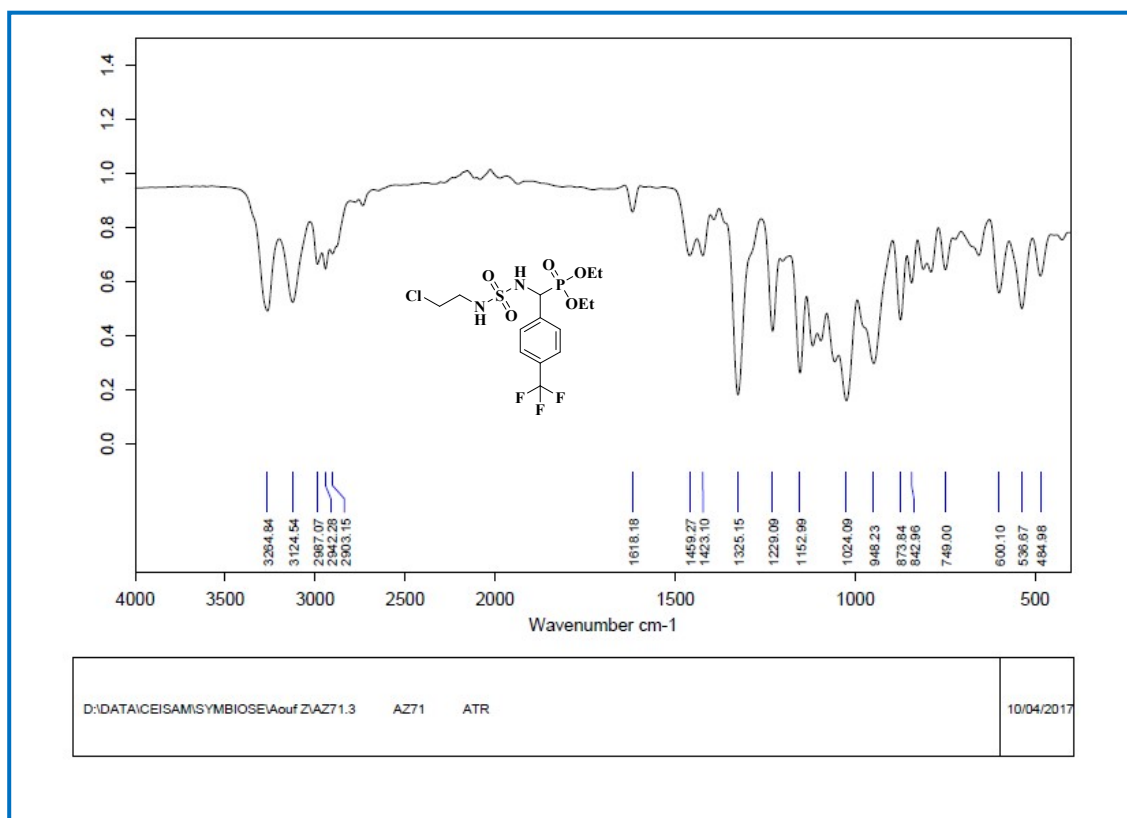

**IR Spectrum:** Diethyl (((N-(2-chloroethyl)sulfamoyl)amino)(4-(trifluoromethyl)phenyl)methyl)phosphonate (16h)

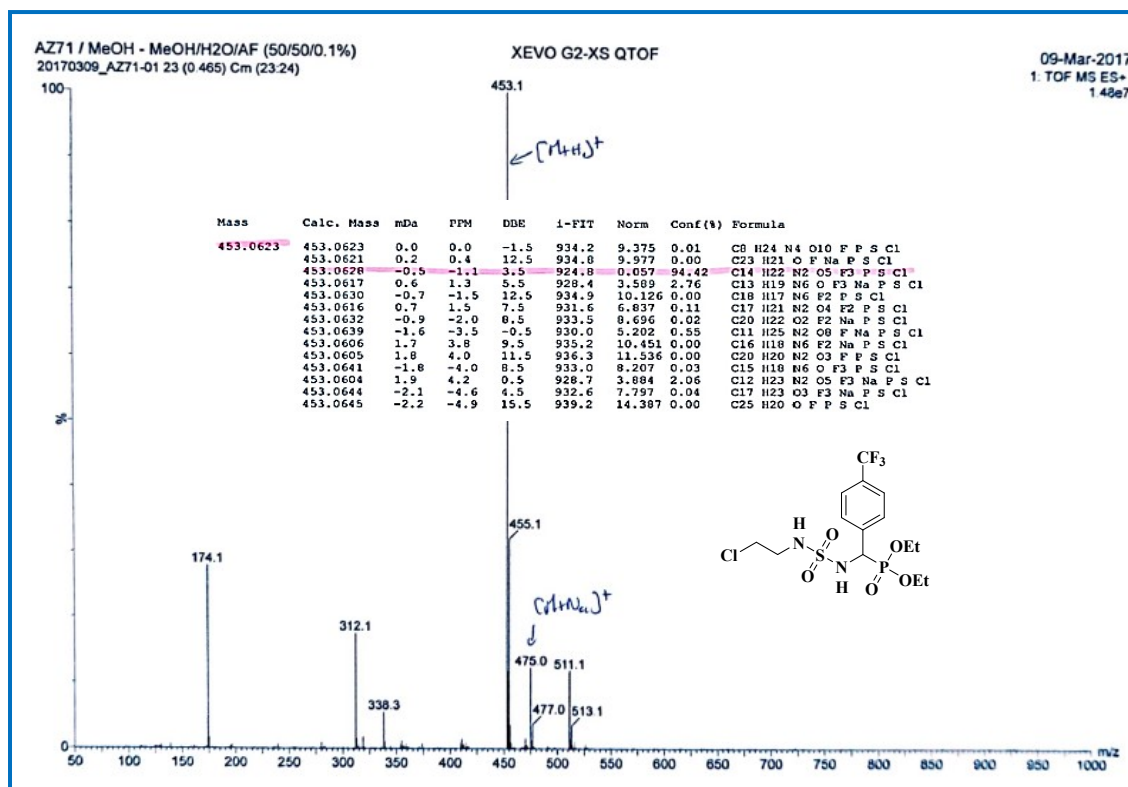

**MS Spectrum:** Diethyl (((N-(2-chloroethyl)sulfamoyl)amino)(4-(trifluoromethyl)phenyl)methyl)phosphonate (16h)

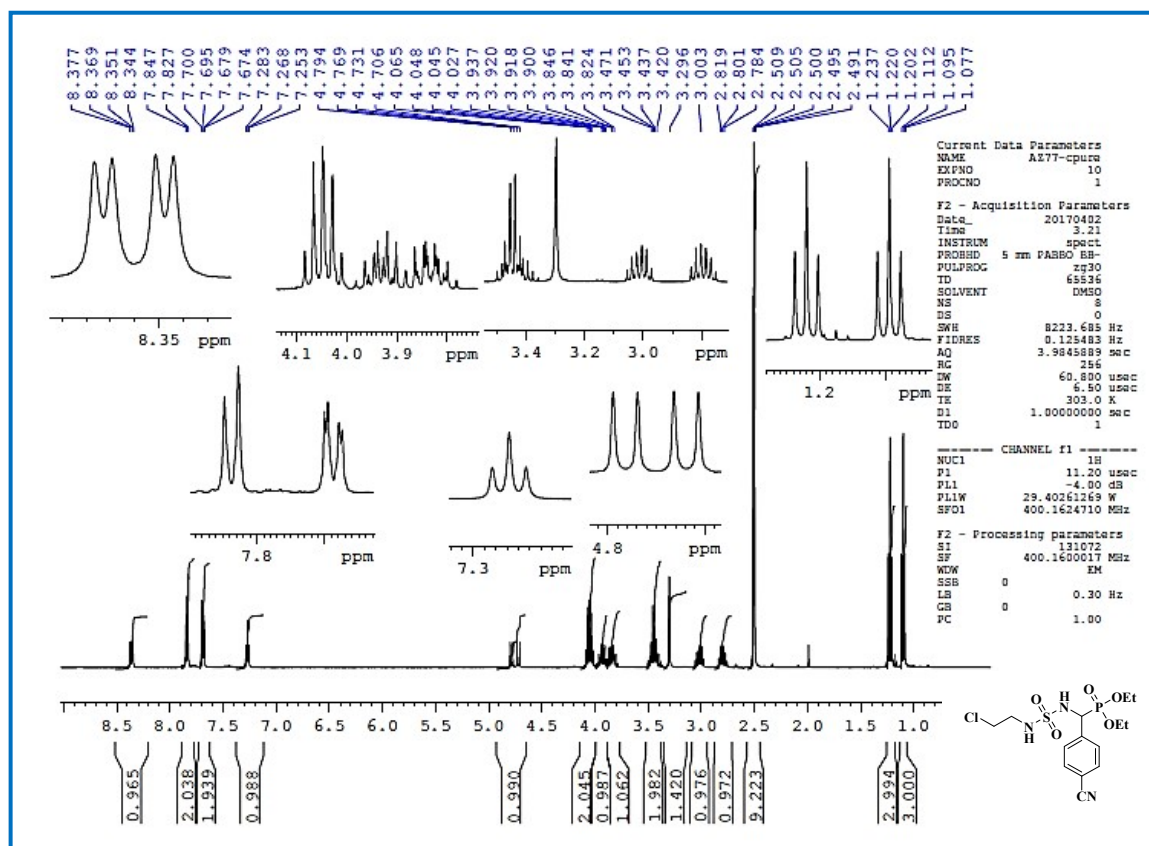

**<sup>1</sup>H NMR Spectrum: Diethyl (((N-(2-chloroethyl)sulfamoyl)amino)(4-cyanophenyl)methyl)phosphonate (16i)**

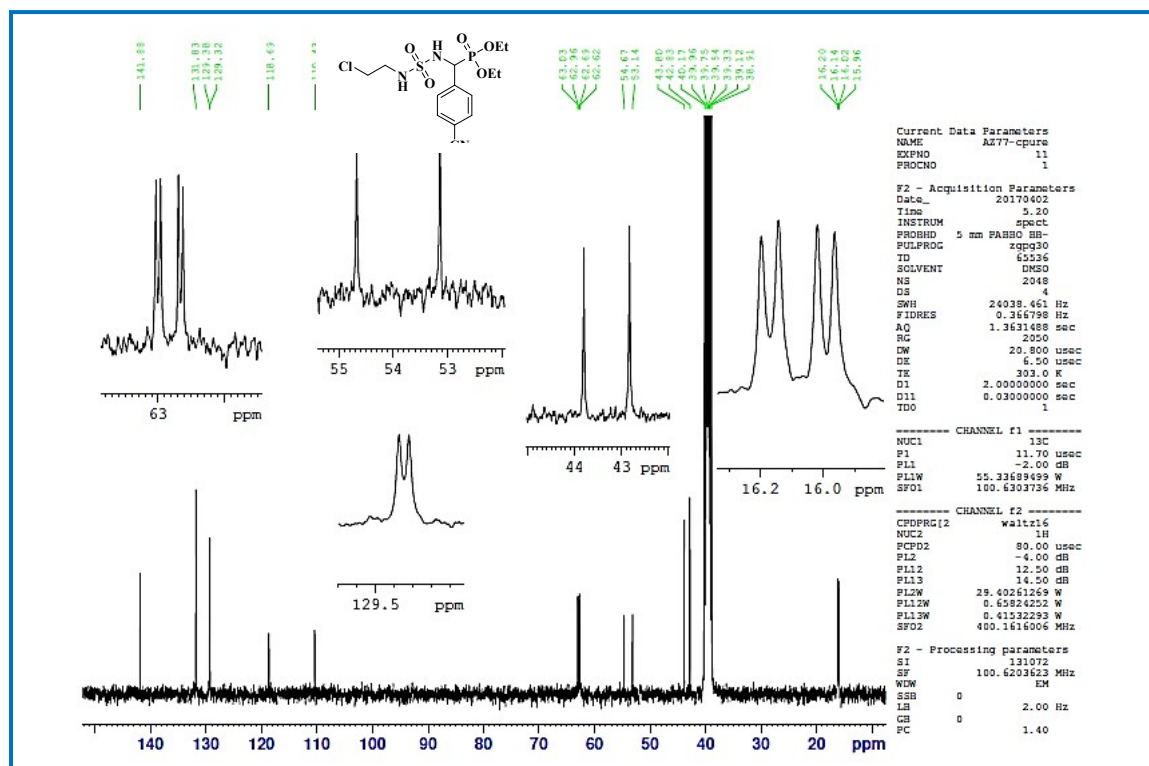

**<sup>13</sup>C NMR Spectrum: Diethyl (((N-(2-chloroethyl)sulfamoyl)amino)(4-cyanophenyl)methyl)phosphonate (16i)**

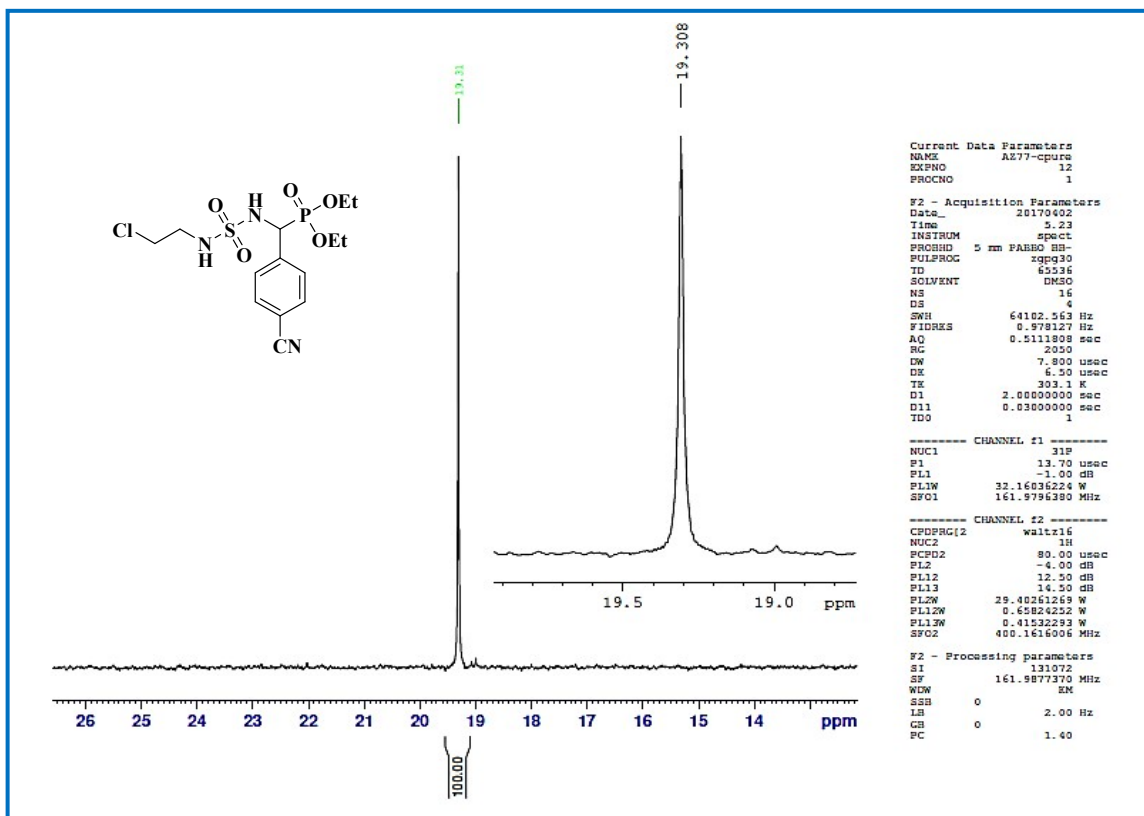

**<sup>31</sup>P NMR Spectrum:** Diethyl (((N-(2-chloroethyl)sulfamoyl)amino)(4-cyanophenyl)methyl)phosphonate (16i)

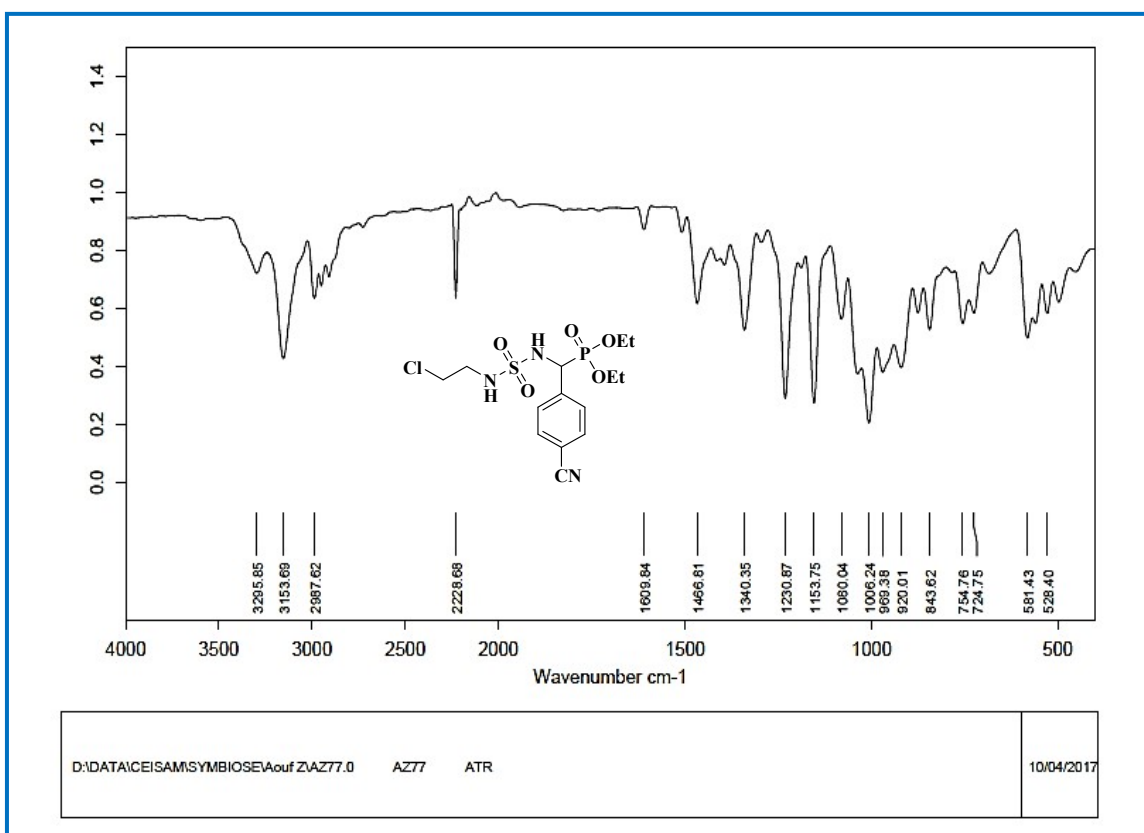

**IR Spectrum:** Diethyl (((N-(2-chloroethyl)sulfamoyl)amino)(4-cyanophenyl)methyl)phosphonate (16i)

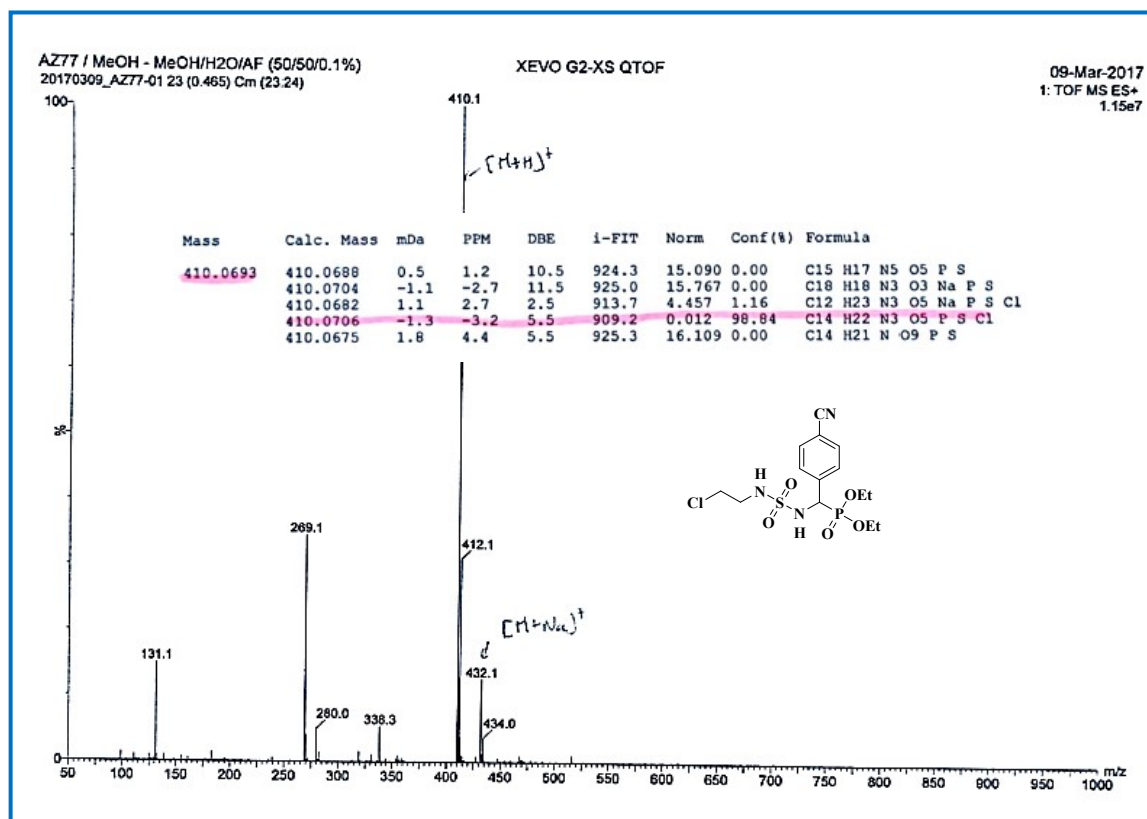

**MS Spectrum:** Diethyl (((N-(2-chloroethyl)sulfamoyl)amino)(4-cyanophenyl)methyl)phosphonate (16i)

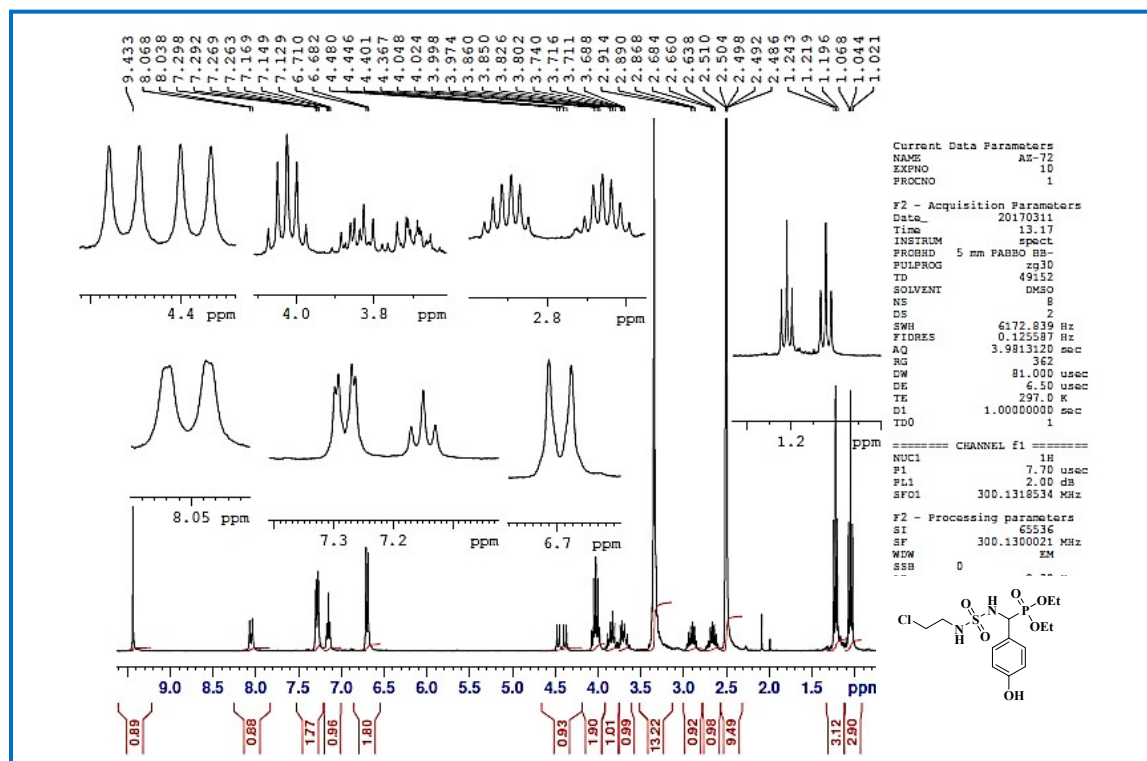

**<sup>1</sup>H NMR Spectrum:** Diethyl (((N-(2-chloroethyl)sulfamoyl)amino)(4-hydroxyphenyl)methyl)phosphonate (16j)

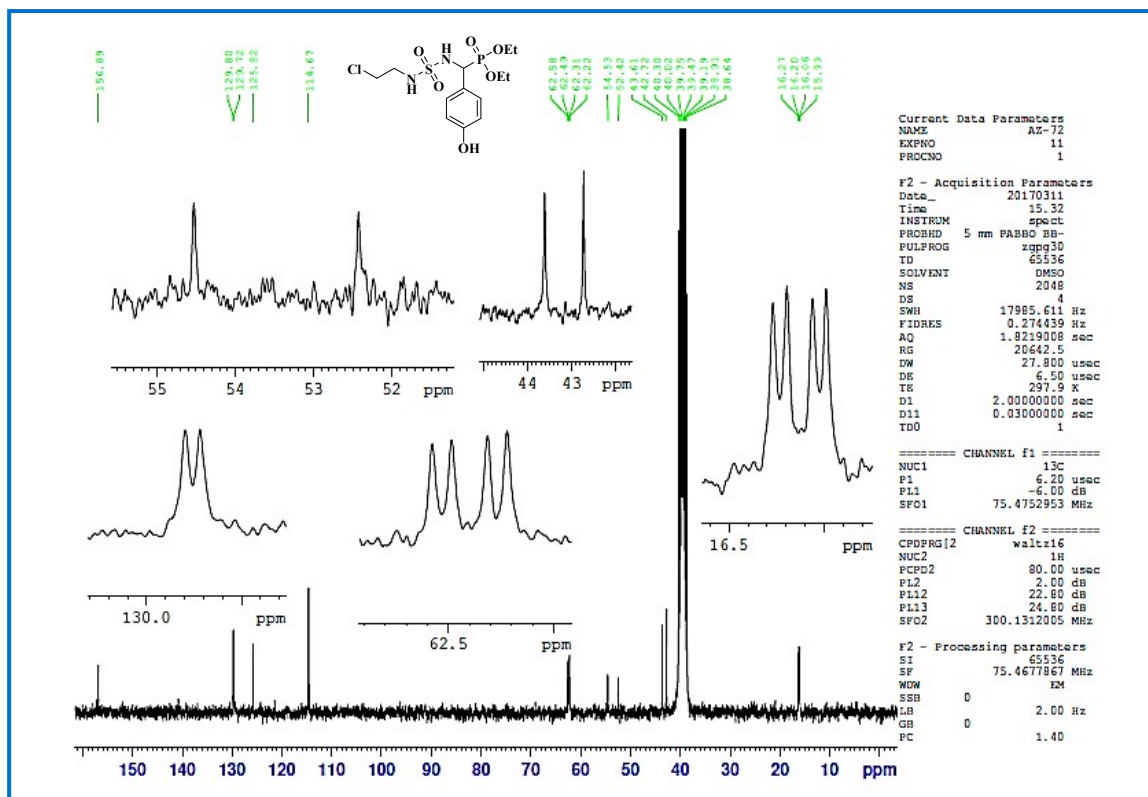

**<sup>13</sup>C NMR Spectrum:** Diethyl (((N-(2-chloroethyl)sulfamoyl)amino)(4-hydroxyphenyl)methyl)phosphonate (16j)

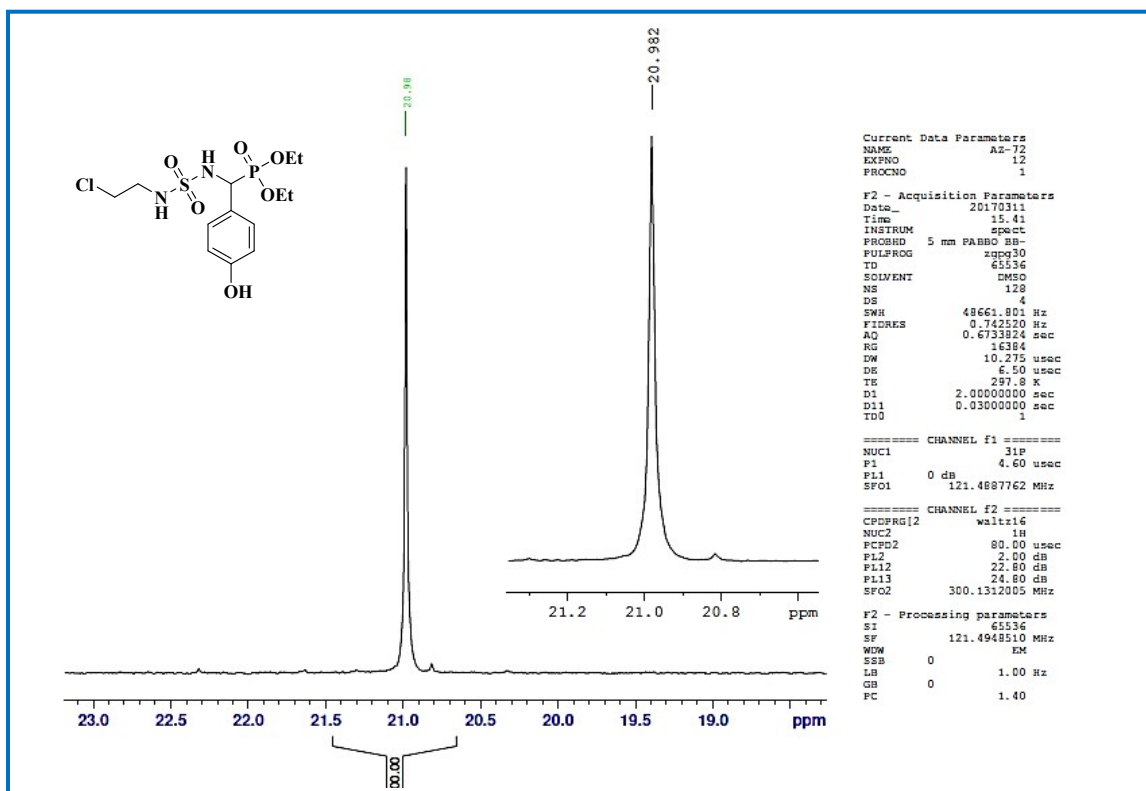

**<sup>31</sup>P NMR Spectrum:** Diethyl (((N-(2-chloroethyl)sulfamoyl)amino)(4-hydroxyphenyl)methyl)phosphonate (16j)

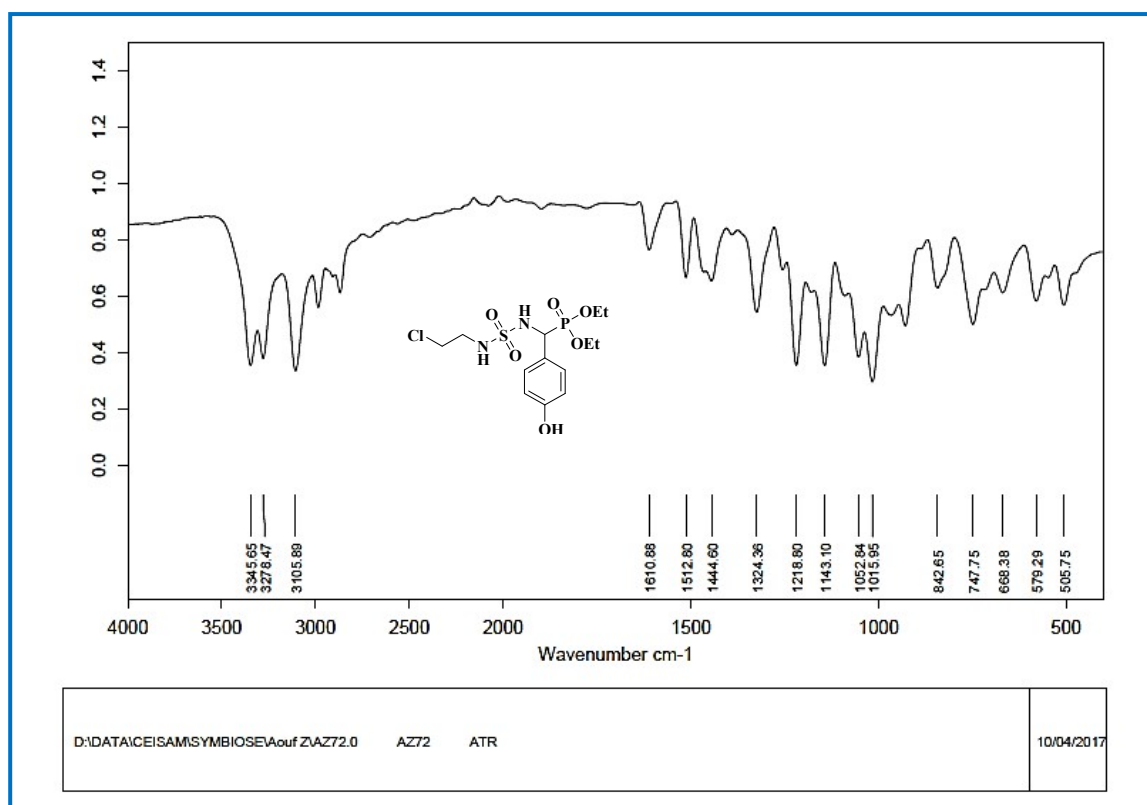

**IR Spectrum:** Diethyl (((N-(2-chloroethyl)sulfamoyl)amino)(4-hydroxyphenyl)methyl)phosphonate (16j)

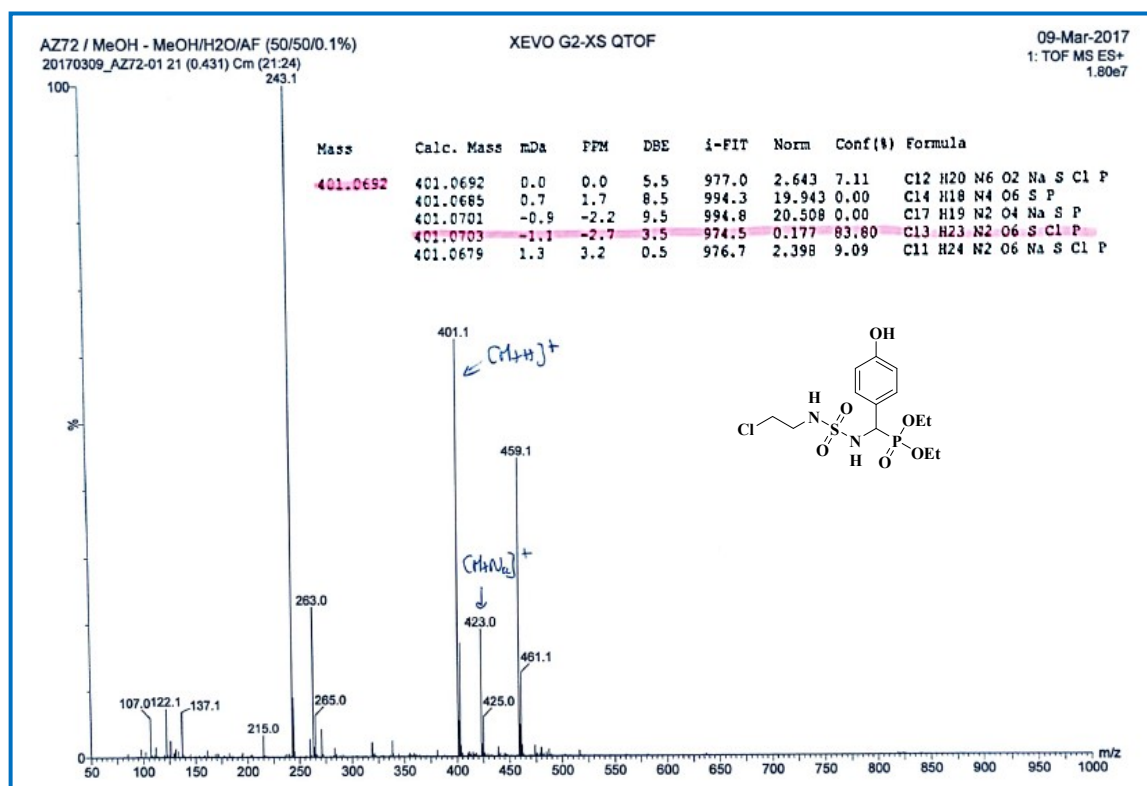

**MS Spectrum:** Diethyl (((N-(2-chloroethyl)sulfamoyl)amino)(4-hydroxyphenyl)methyl)phosphonate (16j)

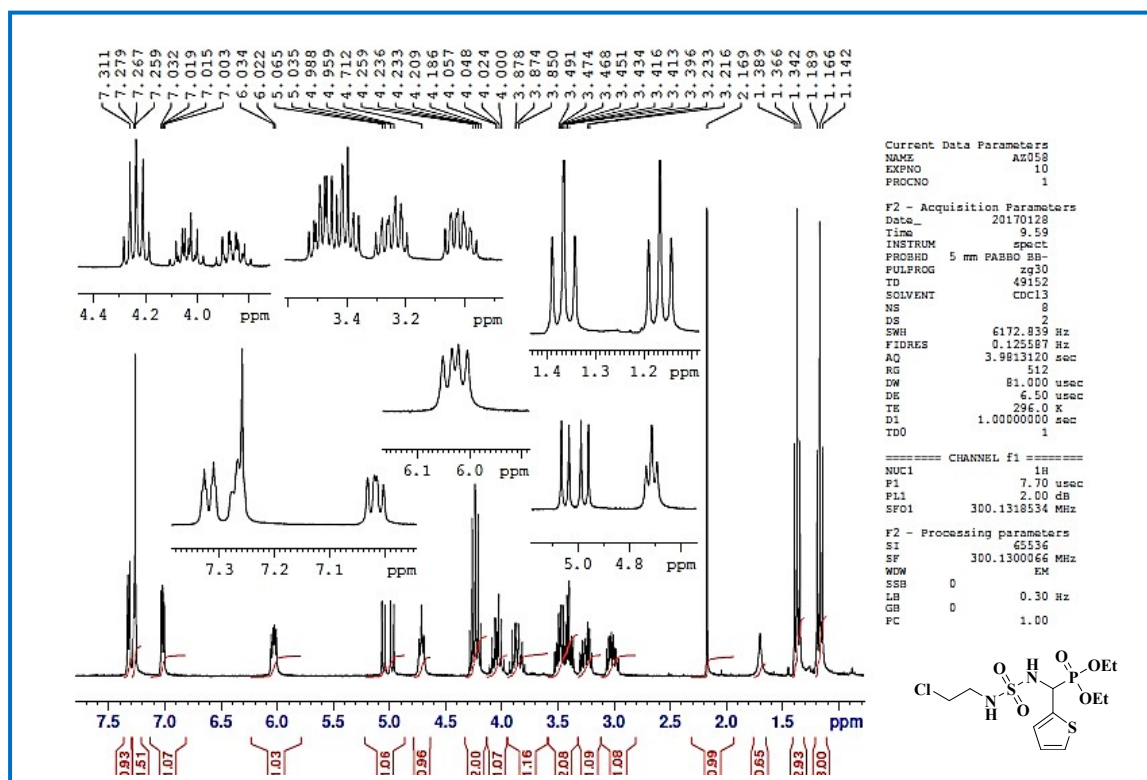

**<sup>1</sup>H NMR Spectrum:** Diethyl (((N-(2-chloroethyl)sulfamoyl)amino)(thiophen-2-yl)methyl)phosphonate (16k)

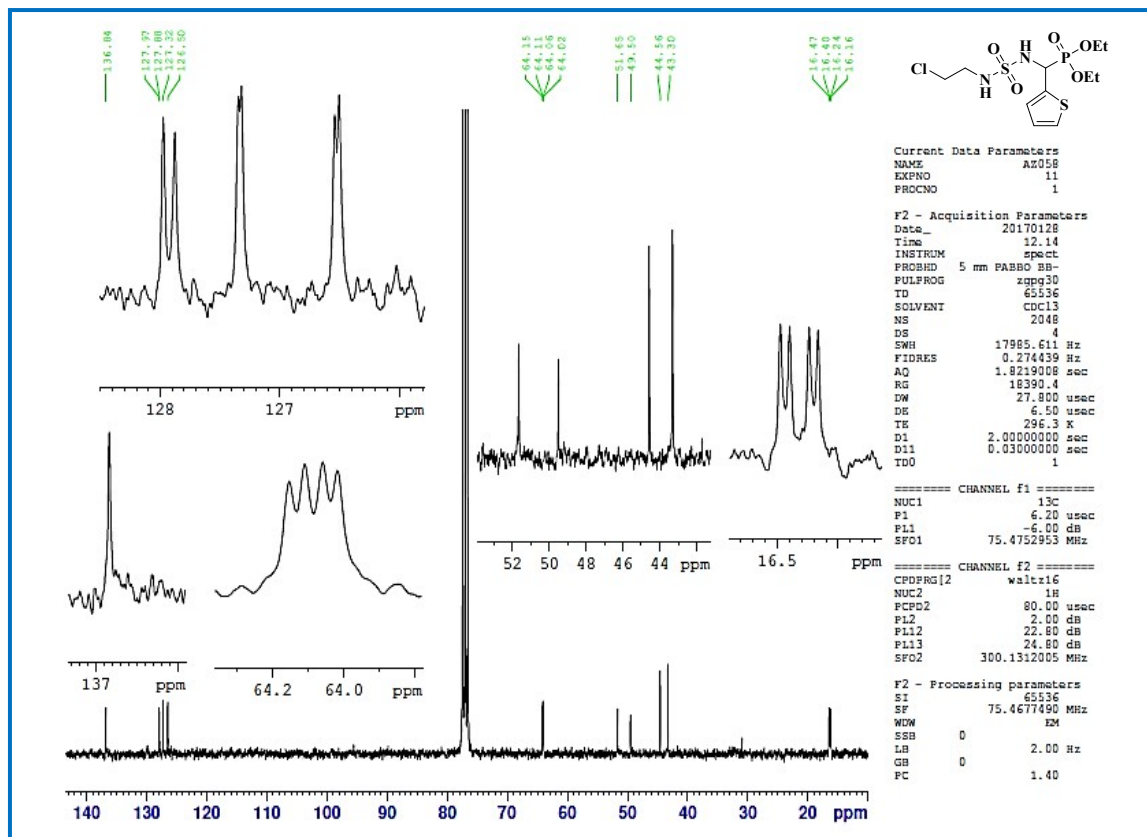

**<sup>13</sup>C NMR Spectrum:** Diethyl (((N-(2-chloroethyl)sulfamoyl)amino)(thiophen-2-yl)methyl)phosphonate (16k)

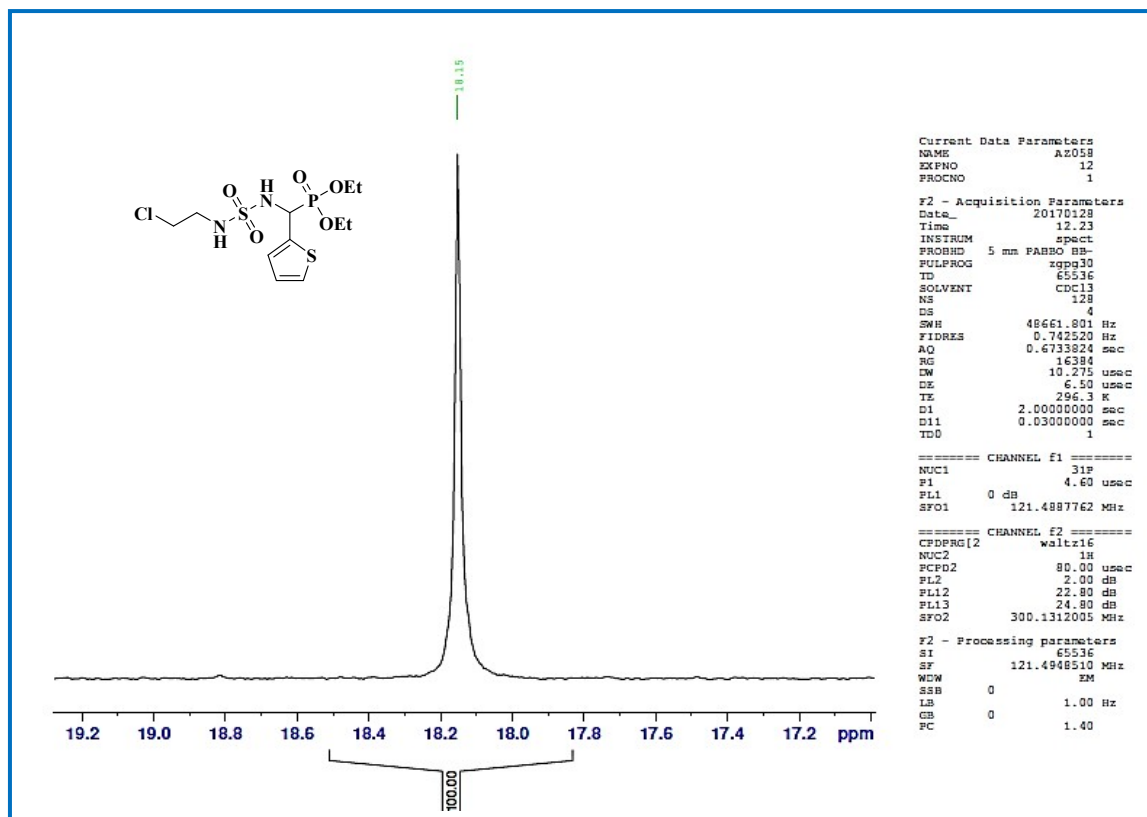

**<sup>31</sup>P NMR Spectrum:** Diethyl (((N-(2-chloroethyl)sulfamoyl)amino)(thiophen-2-yl)methyl)phosphonate (16k)

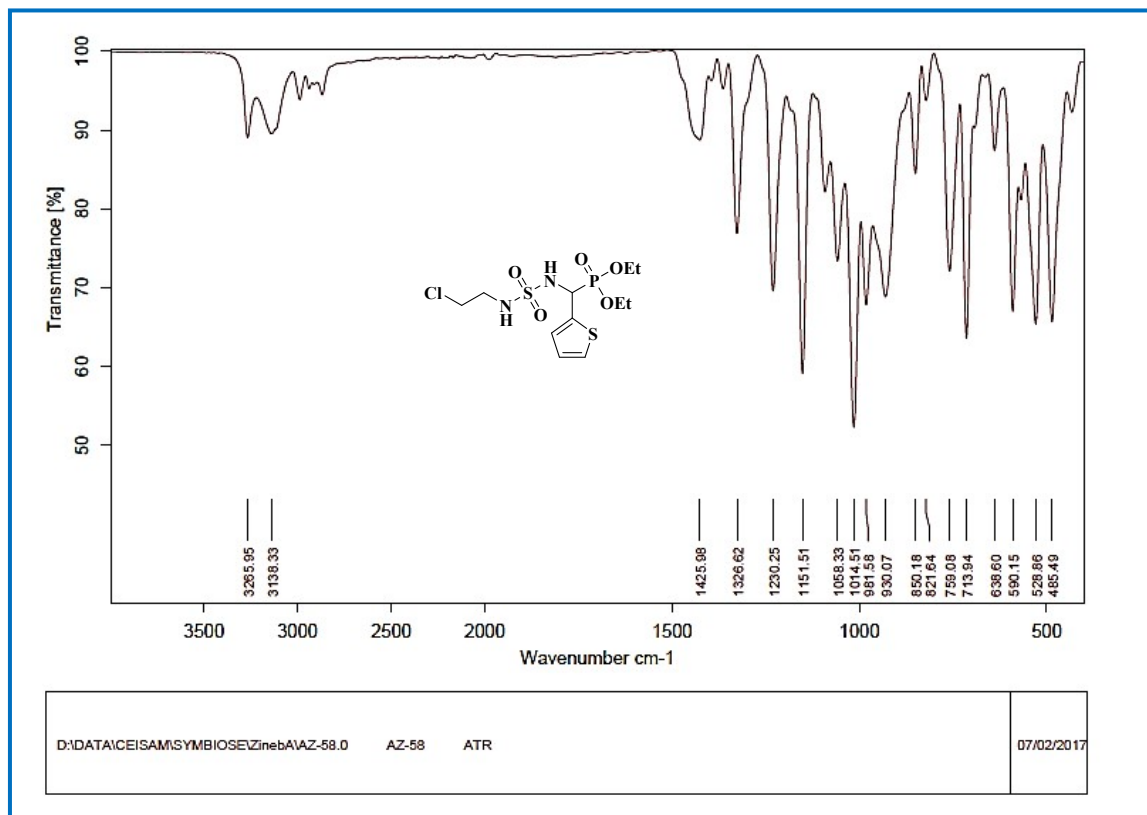

**IR Spectrum:** Diethyl (((N-(2-chloroethyl)sulfamoyl)amino)(thiophen-2-yl)methyl)phosphonate (16k)

AZ58 / DCM - H2O/MeOH/AF (50/50/0.1%)  
20170203\_AZ58 19 (0.398) Cm (18:19)

XEVO G2-XS QTOF

03-Feb-2017  
1: TOF MS ES+  
1.20e7

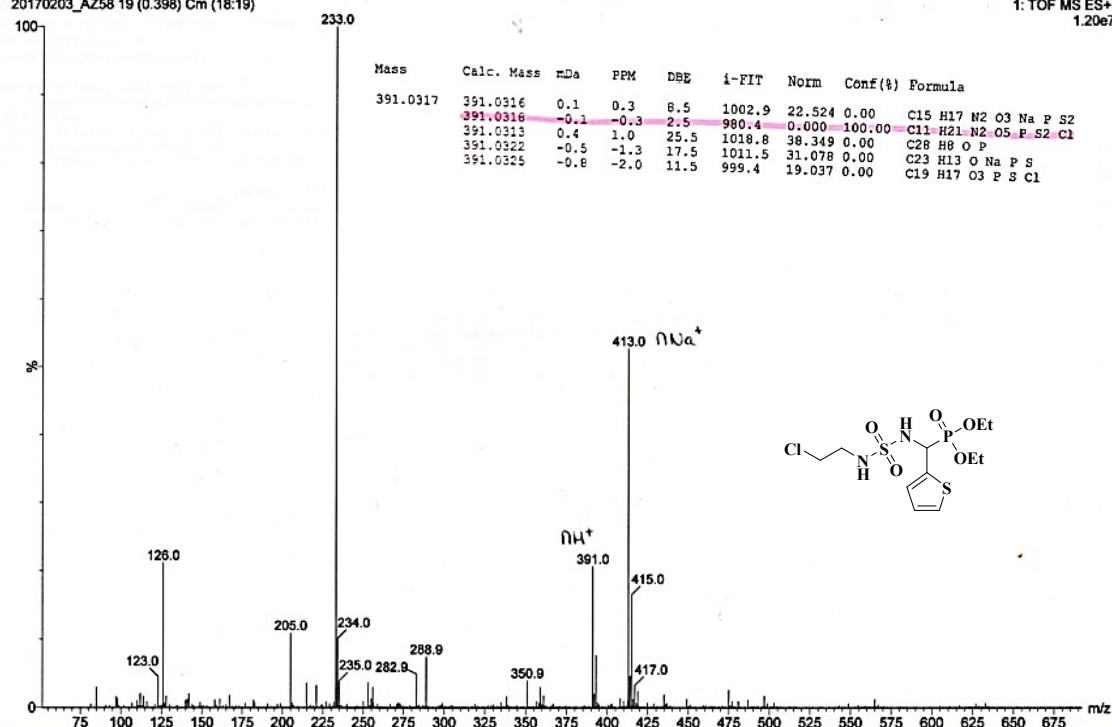

**MS Spectrum:** Diethyl (((N-(2-chloroethyl)sulfamoyl)amino)(thiophen-2-yl)methyl)phosphonate (16k)

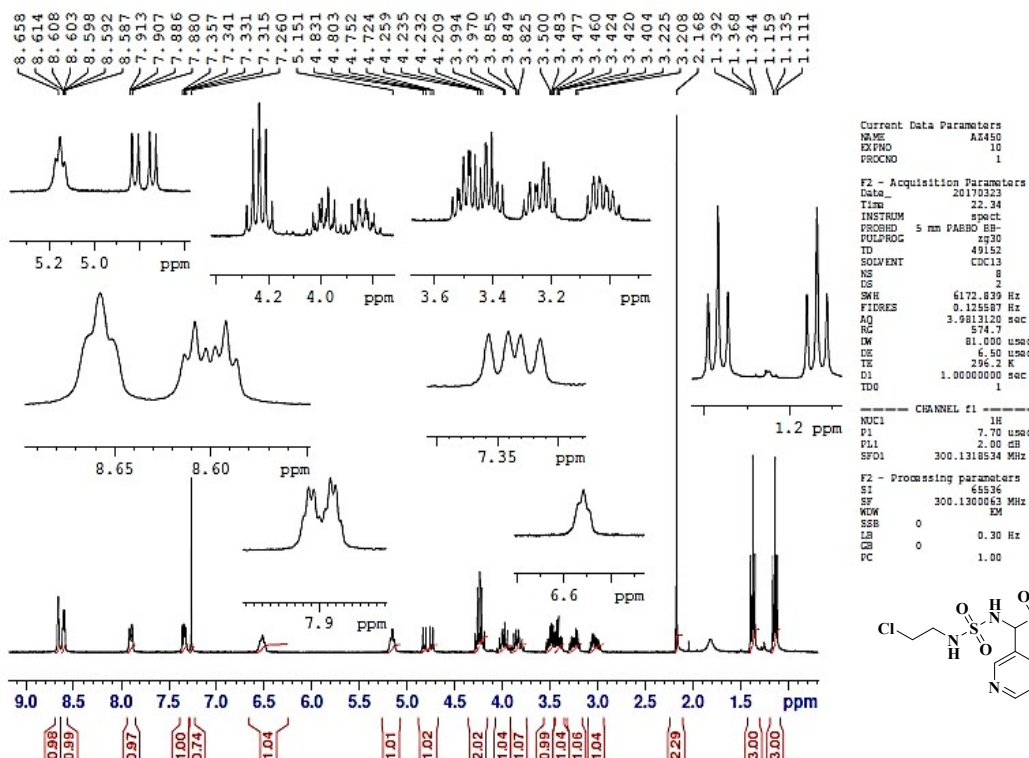

**<sup>1</sup>H NMR Spectrum:** Diethyl (((N-(2-chloroethyl)sulfamoyl)amino)(pyridin-3-yl)methyl)phosphonate (16l)

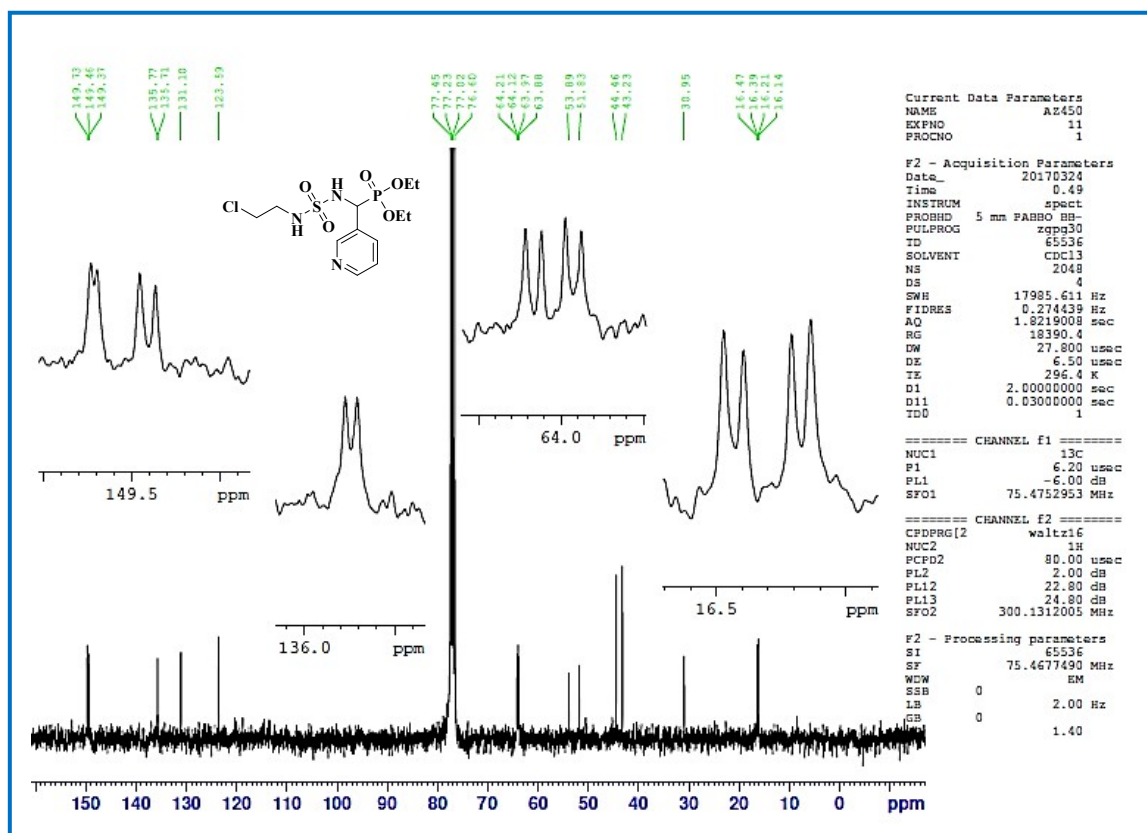

**<sup>13</sup>C NMR Spectrum:** Diethyl (((N-(2-chloroethyl)sulfamoyl)amino)(pyridin-3-yl)methyl)phosphonate (16l)

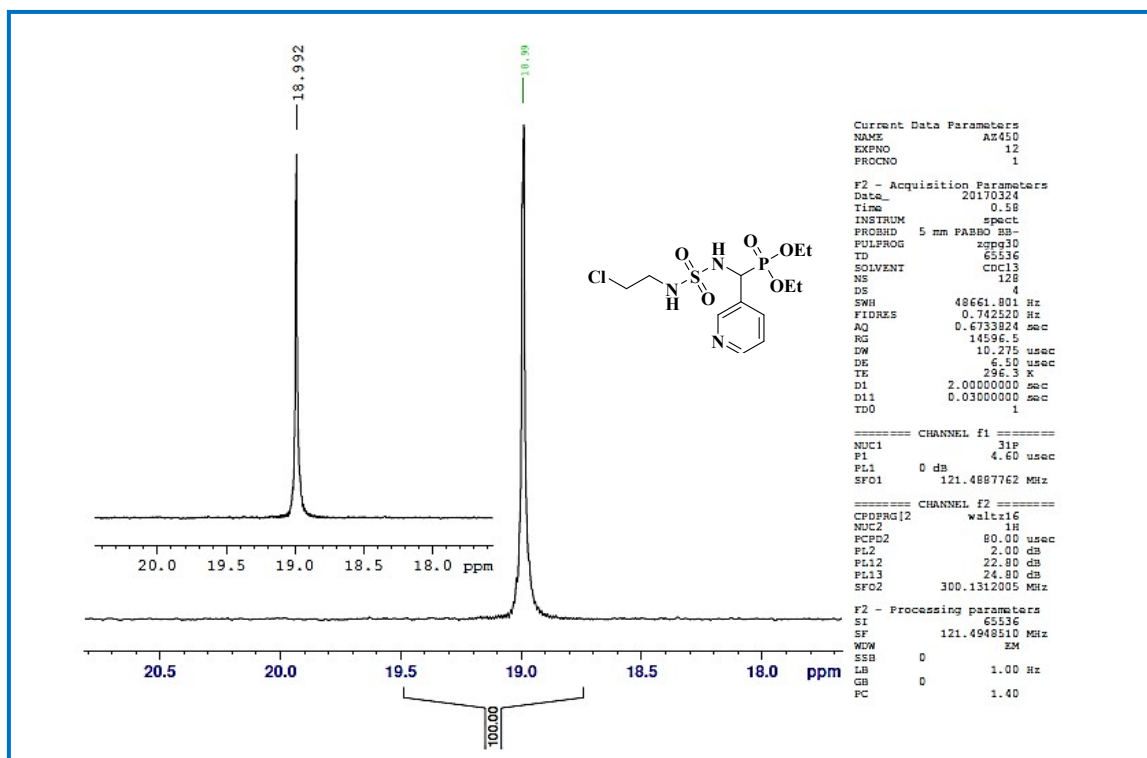

**<sup>31</sup>P NMR Spectrum:** Diethyl (((N-(2-chloroethyl)sulfamoyl)amino)(pyridin-3-yl)methyl)phosphonate (16l)

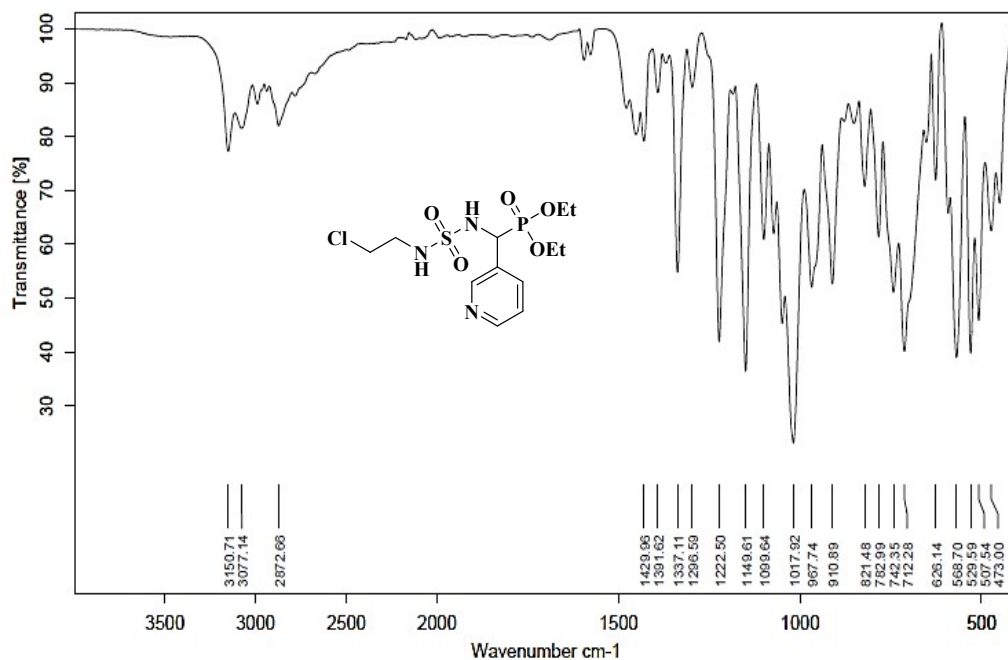

D:\DATA\CEISAM\SYMBIOSE\Zineb\AIAZ-45.1 AZ-45 ATR

07/02/2017

**IR Spectrum:** Diethyl (((N-(2-chloroethyl)sulfamoyl)amino)(pyridin-3-yl)methyl)phosphonate (16l)

AZ45 / DCM - H2O/MeOH/AF (50/50/0.1%)  
20170203\_AZ45 18 (0.381) Cm (17.19)

XEVO G2-XS QTOF

03-Feb-2017  
1. TOF MS ES+  
3.37e7

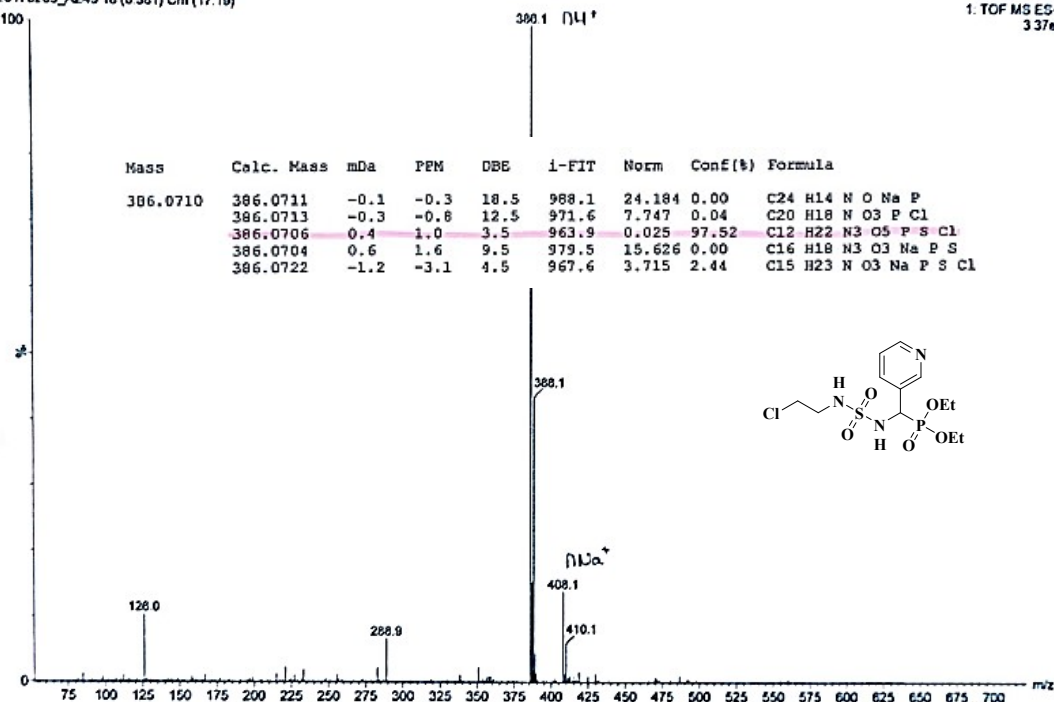

**MS Spectrum:** Diethyl (((N-(2-chloroethyl)sulfamoyl)amino)(pyridin-3-yl)methyl)phosphonate (16l)

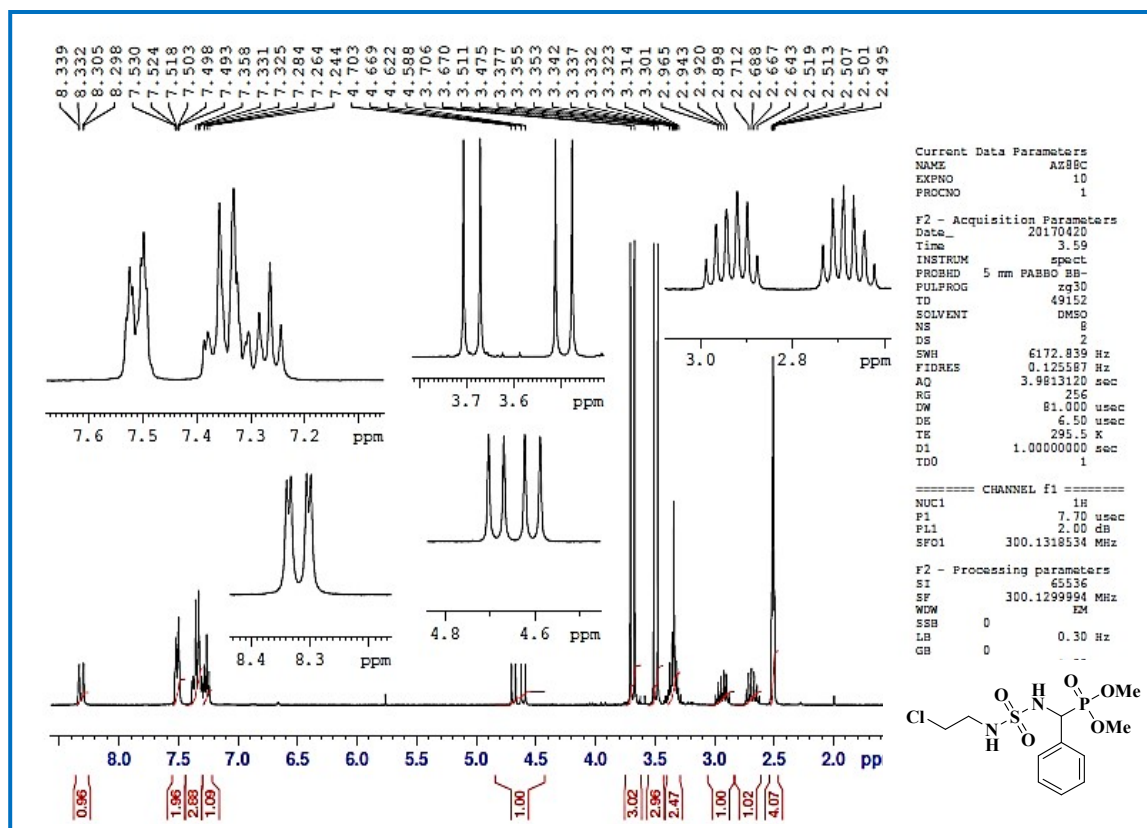

**<sup>1</sup>H NMR Spectrum:** Dimethyl (((N-(2-chloroethyl)sulfamoyl)amino)(phenyl)methyl)phosphonate (**16m**)

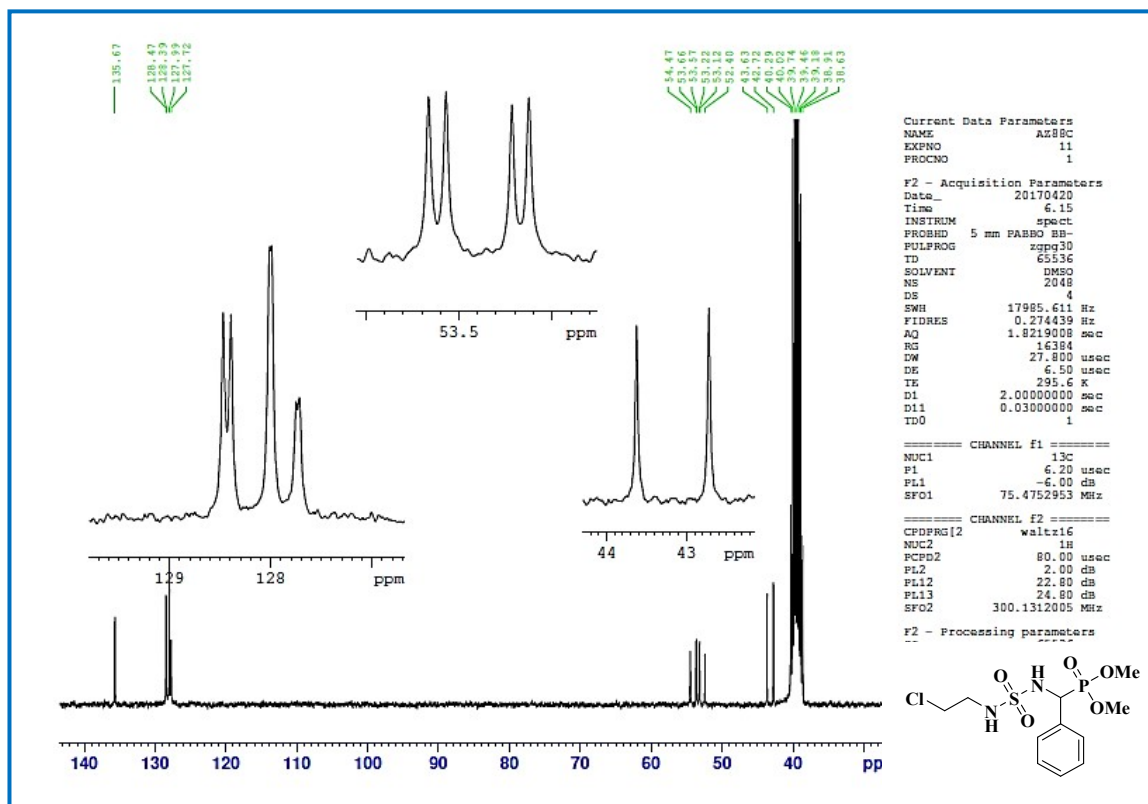

**<sup>13</sup>C NMR Spectrum:** Dimethyl (((N-(2-chloroethyl)sulfamoyl)amino)(phenyl)methyl)phosphonate (**16m**)

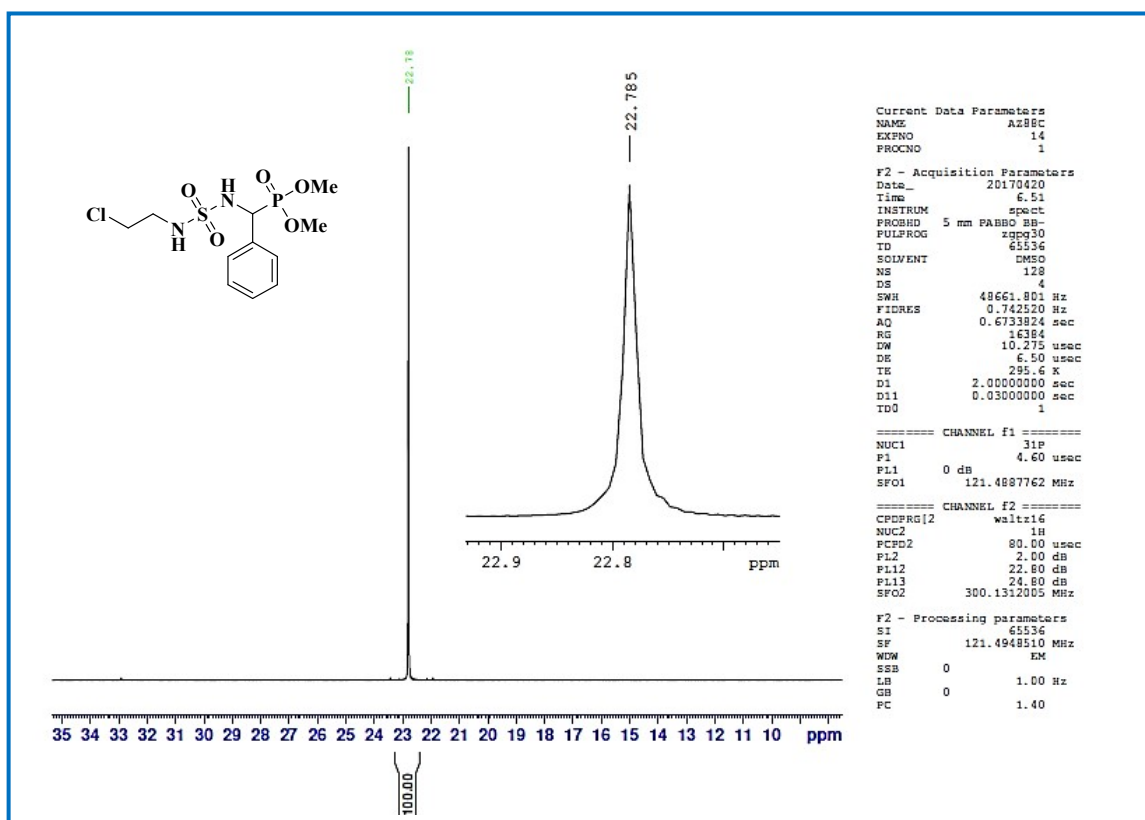

**<sup>31</sup>P NMR Spectrum:** Dimethyl (((N-(2-chloroethyl)sulfamoyl)amino)(phenyl)methyl)phosphonate (**16m**)

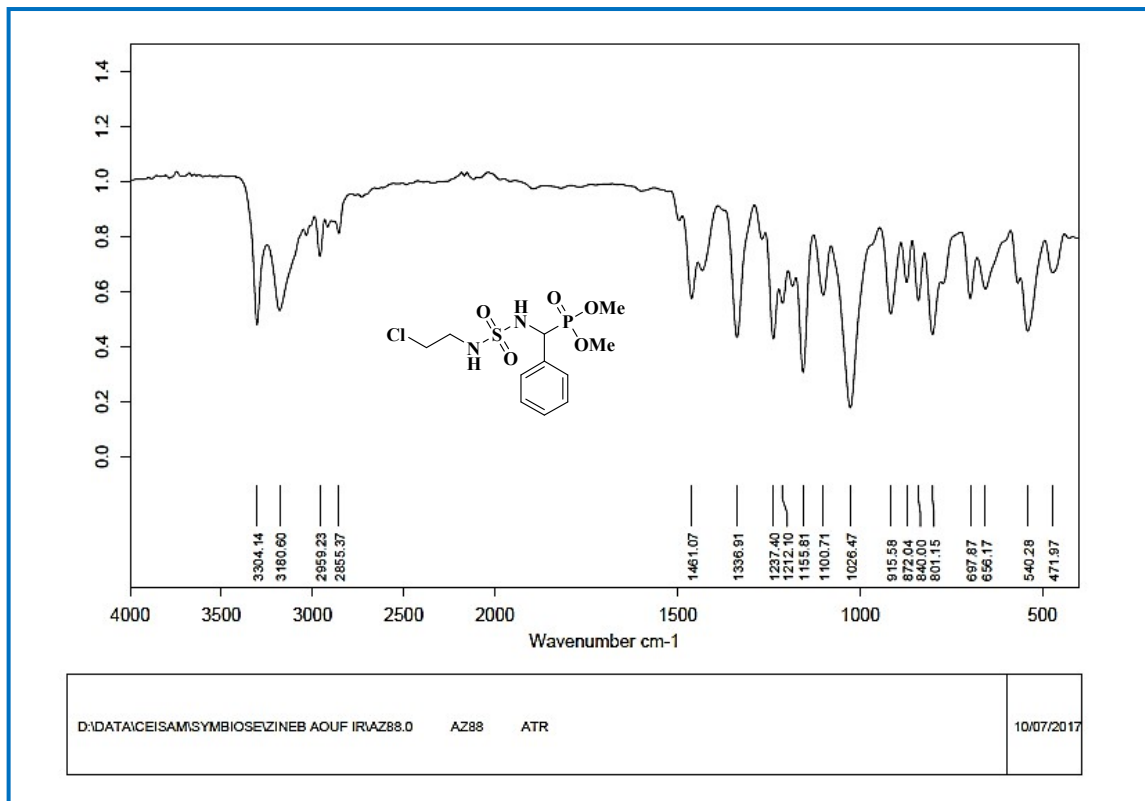

**IR Spectrum:** Dimethyl (((N-(2-chloroethyl)sulfamoyl)amino)(phenyl)methyl)phosphonate (**16m**)

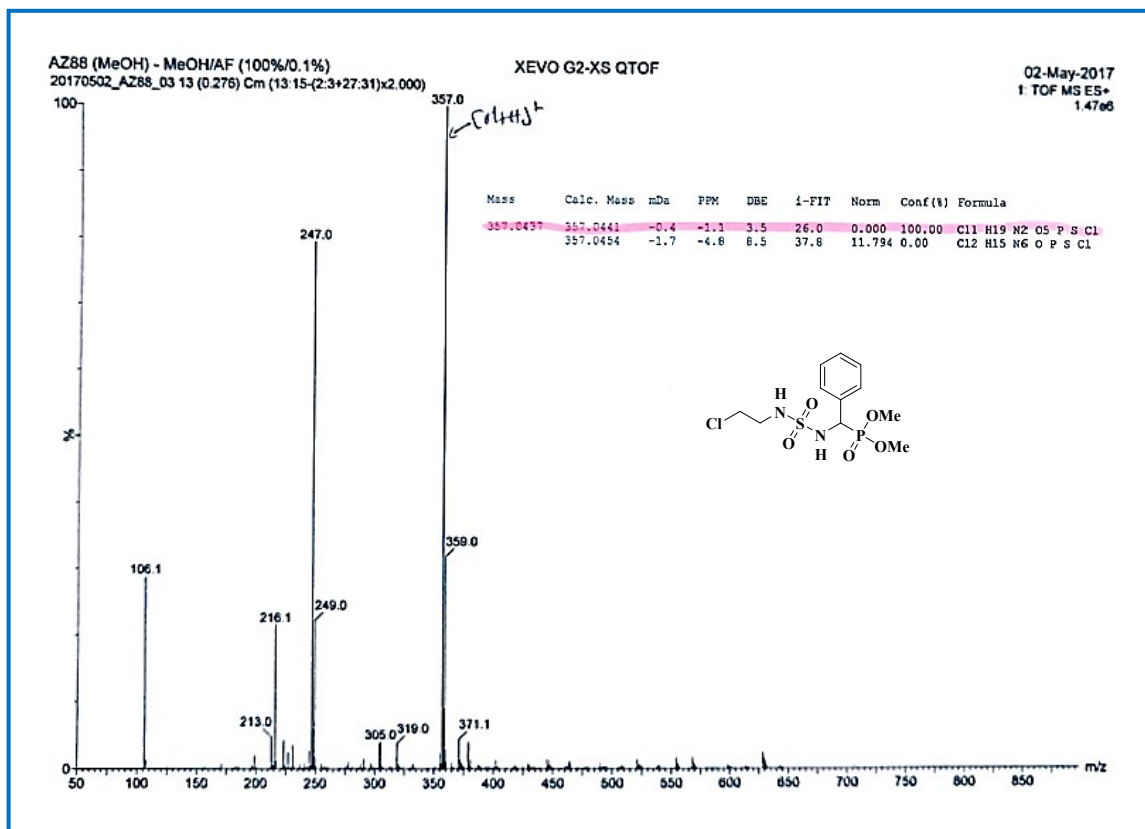

**MS Spectrum: Dimethyl (((N-(2-chloroethyl)sulfamoyl)amino)(phenyl)methyl)phosphonate (16m)**

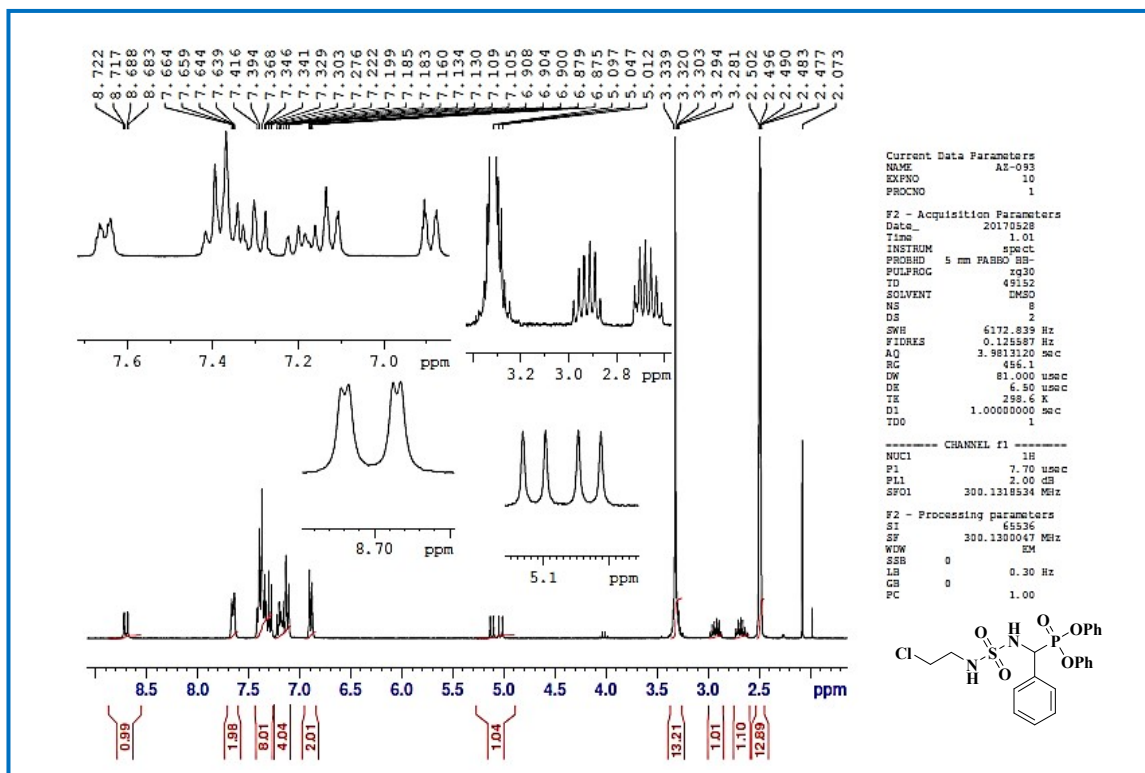

**<sup>1</sup>H NMR Spectrum: Diphenyl (((N-(2-chloroethyl)sulfamoyl)amino)(phenyl)methyl)phosphonate (16n)**

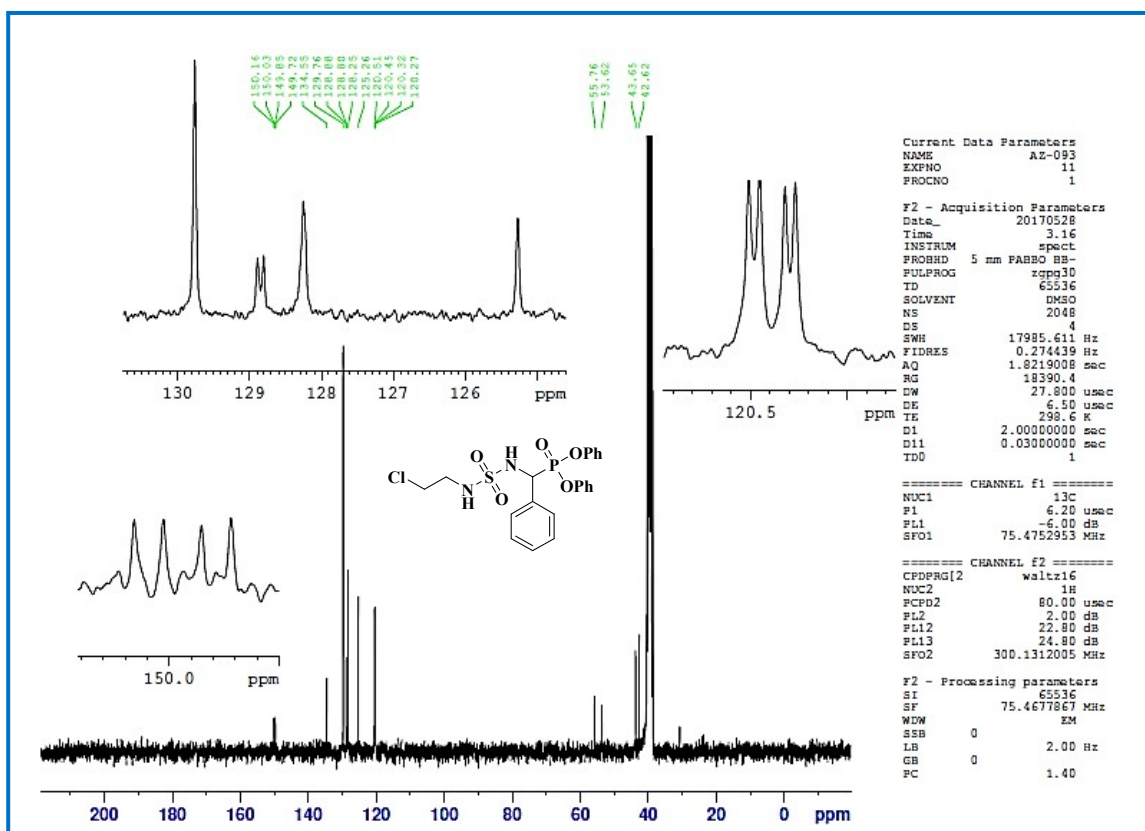

**<sup>13</sup>C NMR Spectrum:** Diphenyl (((N-(2-chloroethyl)sulfamoyl)amino)(phenyl)methyl)phosphonate (**16n**)

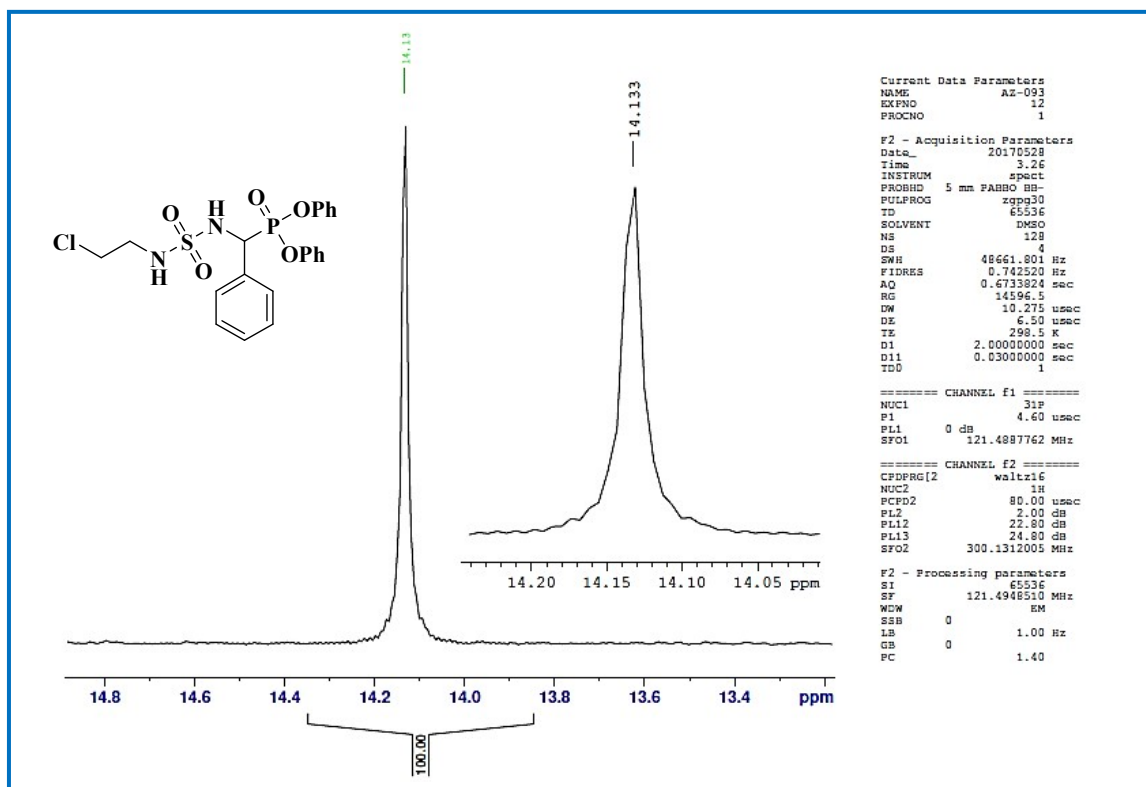

**<sup>31</sup>P NMR Spectrum:** Diphenyl (((N-(2-chloroethyl)sulfamoyl)amino)(phenyl)methyl)phosphonate (**16n**)

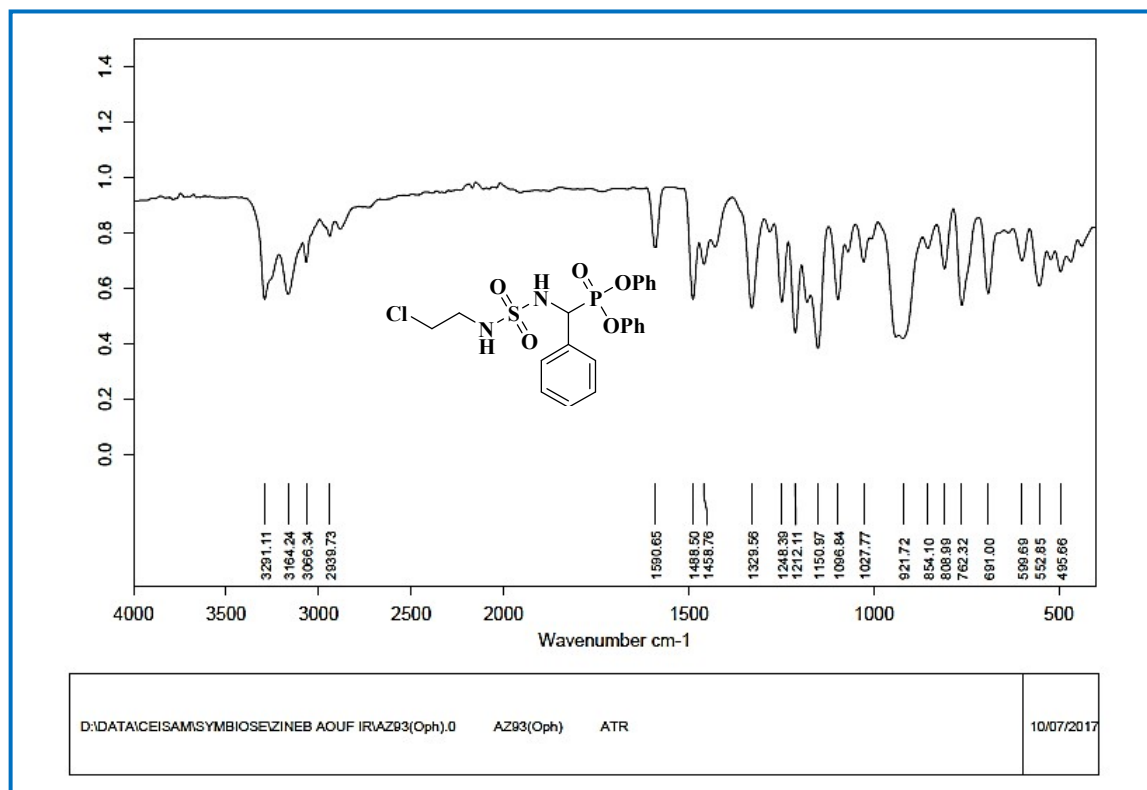

**IR Spectrum:** Diphenyl (((N-(2-chloroethyl)sulfamoyl)amino)(phenyl)methyl)phosphonate (16n)

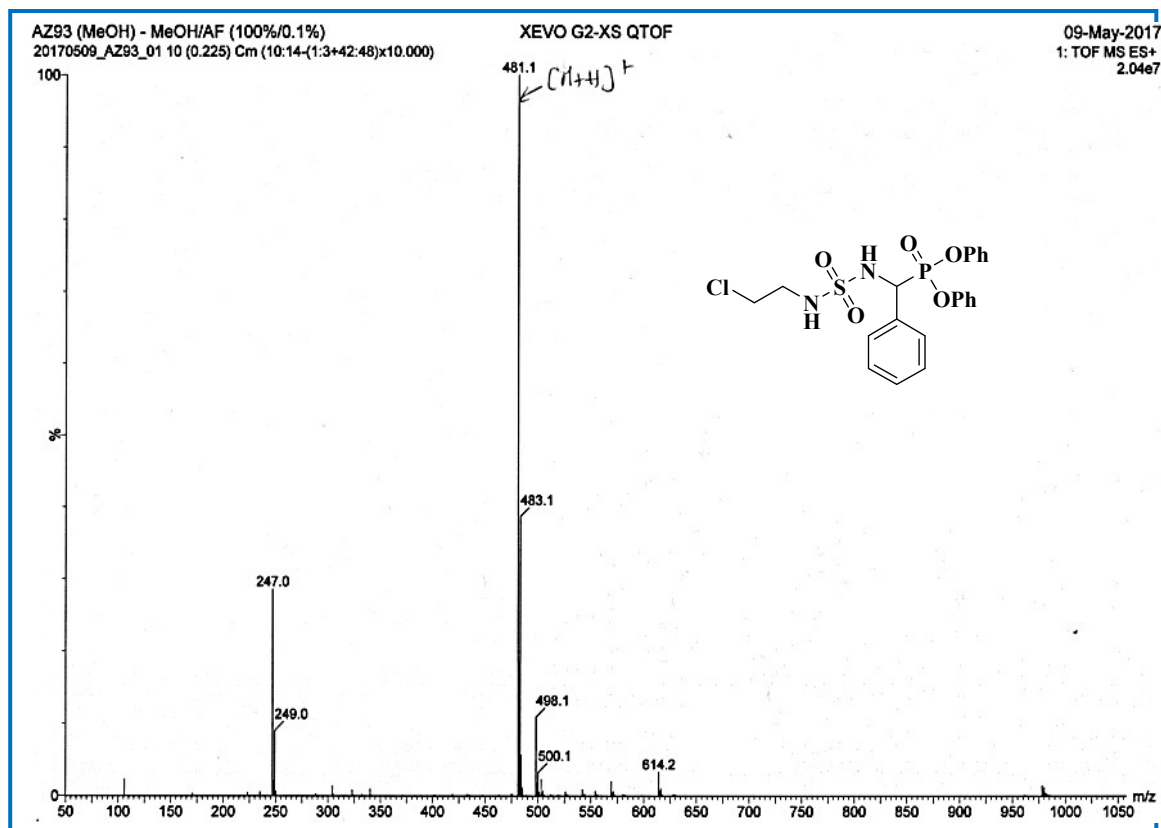

**MS Spectrum:** Diphenyl (((N-(2-chloroethyl)sulfamoyl)amino)(phenyl)methyl)phosphonate (16n)

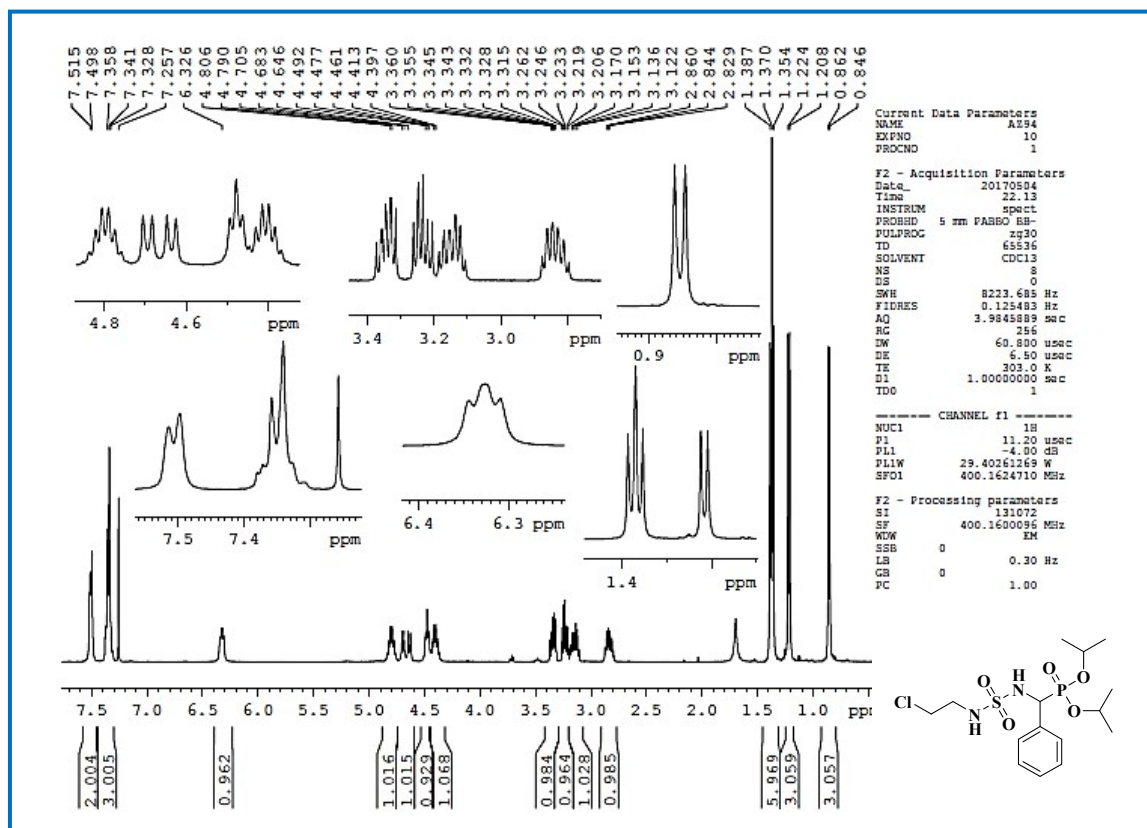

**<sup>1</sup>H NMR Spectrum:** Diisopropyl (((N-(2-chloroethyl)sulfamoyl)amino)(phenyl)methyl)phosphonate (**160**)

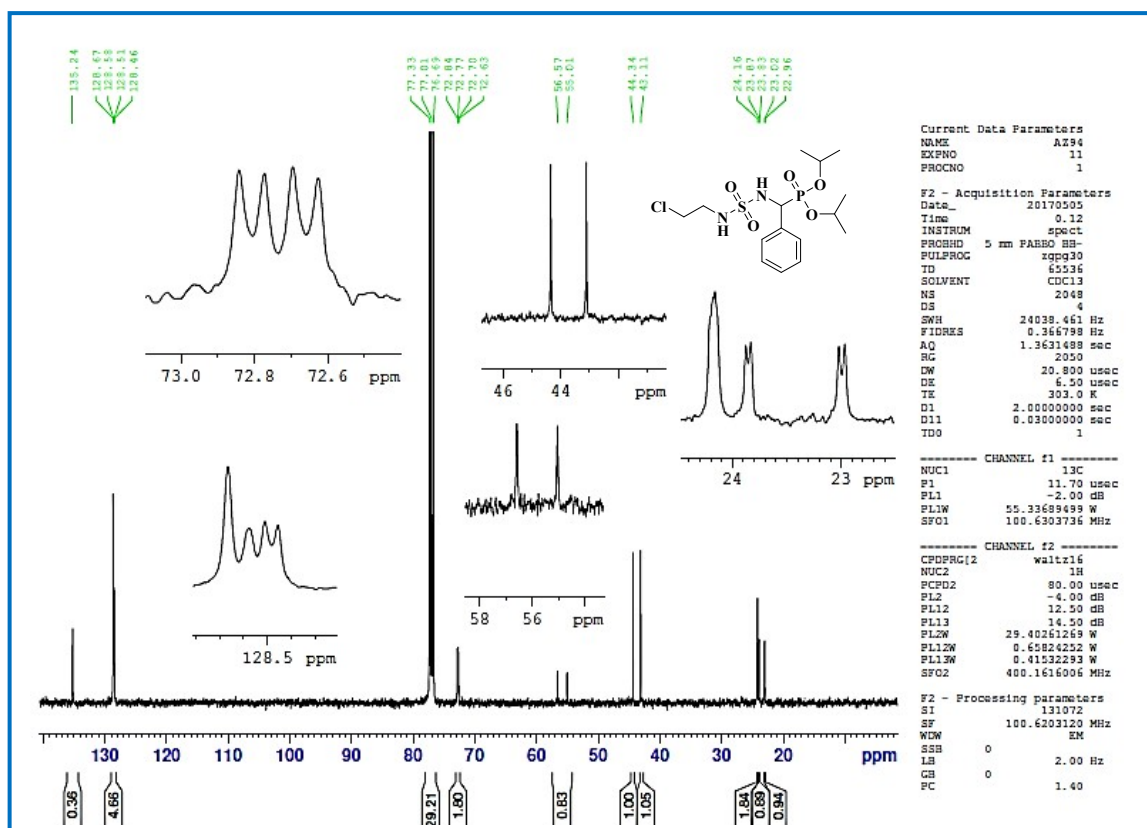

**<sup>13</sup>C NMR Spectrum:** Diisopropyl (((N-(2-chloroethyl)sulfamoyl)amino)(phenyl)methyl)phosphonate (**160**)

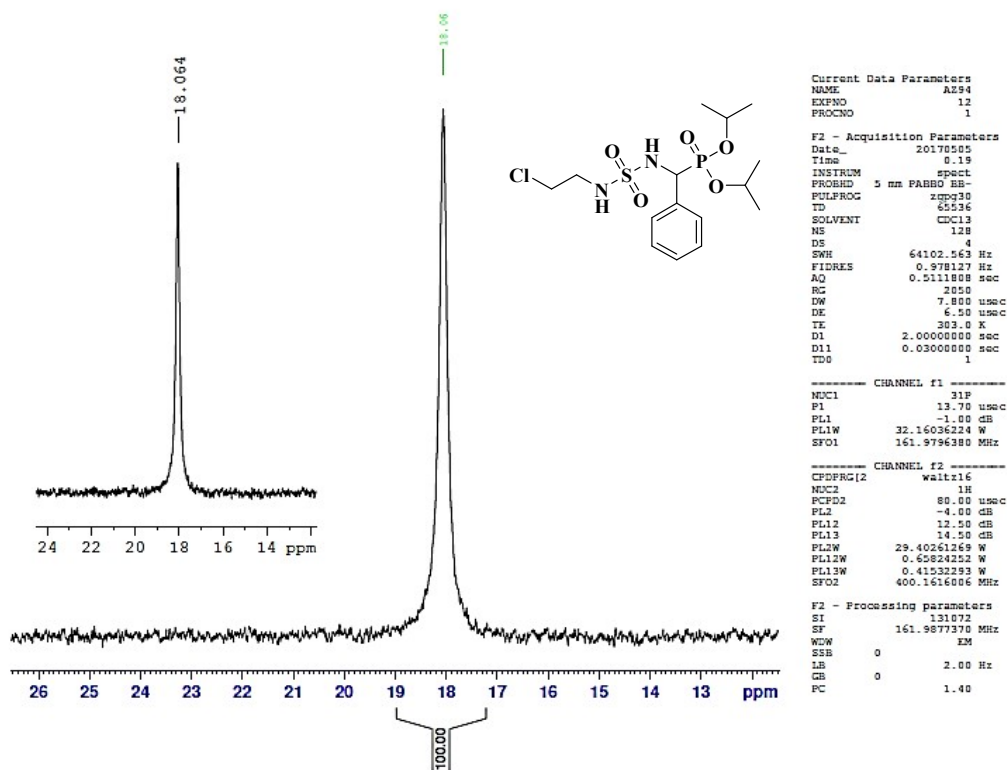

**<sup>31</sup>P NMR Spectrum:** Diisopropyl (((N-(2-chloroethyl)sulfamoyl)amino)(phenyl)methyl)phosphonate (**16o**)

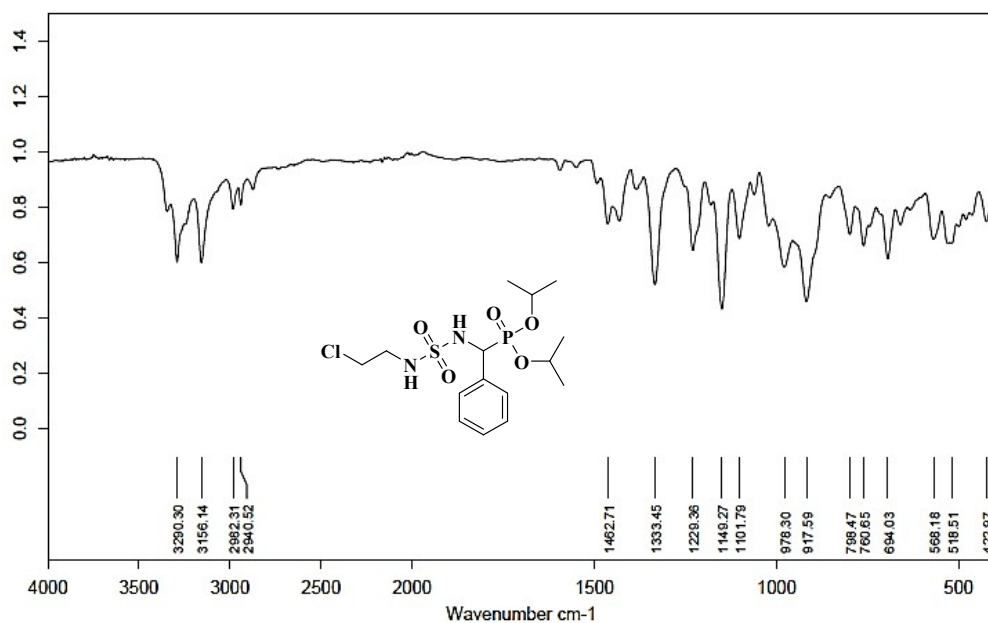

D:\DATA\CEISAM\SYMBIOSE\Zineb\AZ\_94

AZ\_94

ATR

12/05/2017

**IR Spectrum:** Diisopropyl (((N-(2-chloroethyl)sulfamoyl)amino)(phenyl)methyl)phosphonate (**16o**)

AZ94 (MeOH) - MeOH/AF (100%/0.1%)  
20170502\_AZ94\_03 14 (0.293) Cm (14:18-(1:3+28:30)x2.000)

XEVO G2-XS QTOF

02-May-2017  
1: TOF MS ES+  
2.54e6

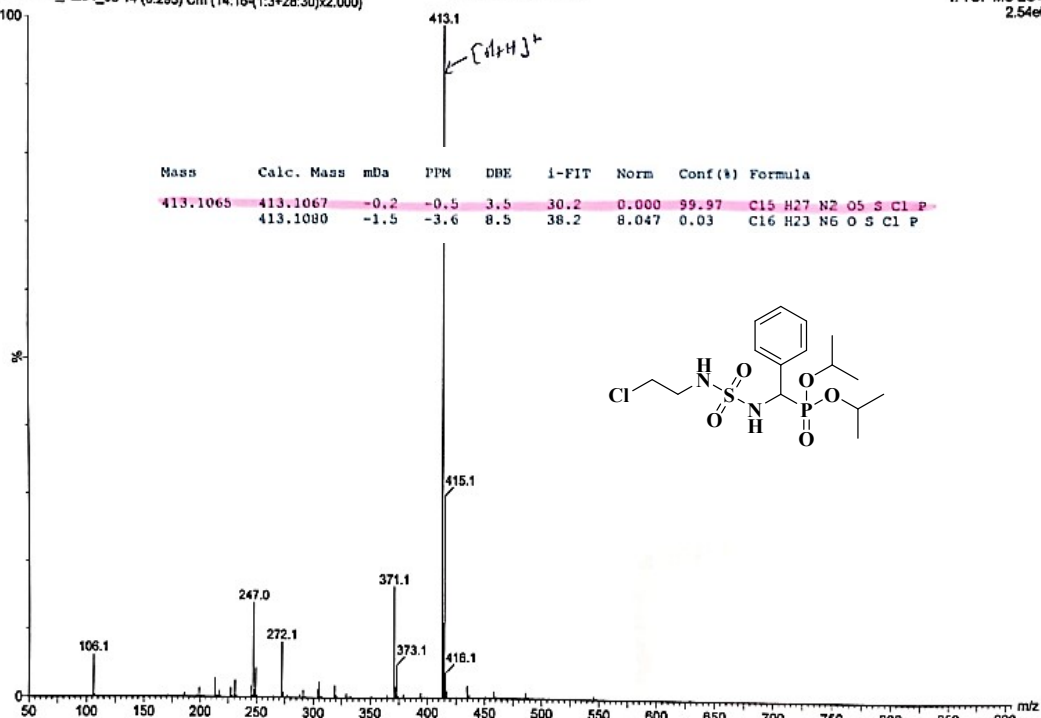

**MS Spectrum:** Diisopropyl (((N-(2-chloroethyl)sulfamoyl)amino)(phenyl)methyl)phosphonate (**160**)

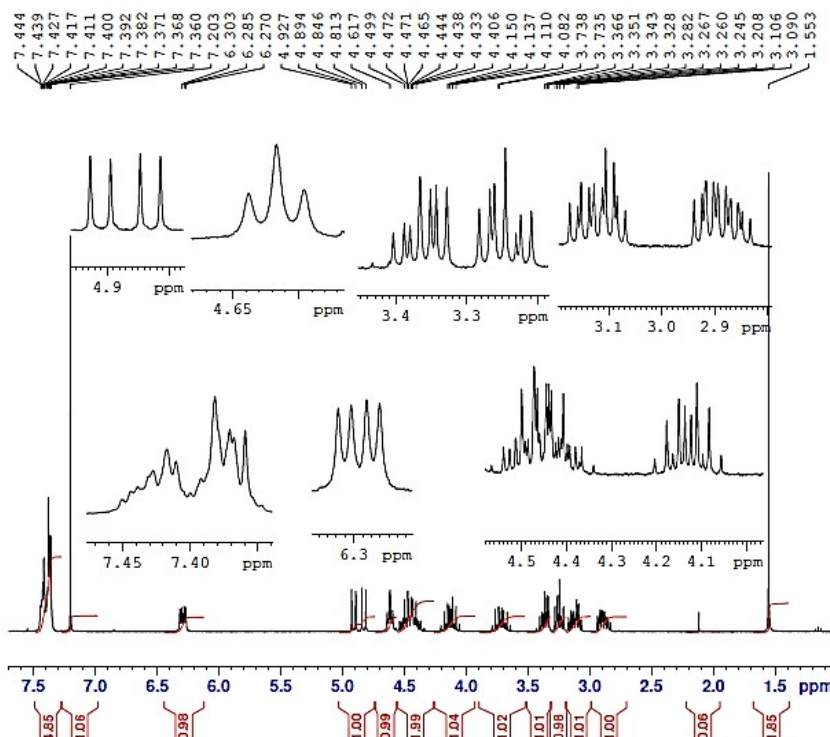

Current Data Parameters  
NAME Az-102  
EXPNO 10  
PROCNO 1  
F2 - Acquisition Parameters  
Date\_ 20170429  
Time 11.44  
INSTRUM spect  
PROBHD 5 mm PABBO BB-  
PULPROG zg30  
TD 49152  
SOLVENT CDCl3  
NS 8  
DS 2  
SWH 6172.839 Hz  
FIDRES 0.125587 Hz  
AQ 3.9813120 sec  
RG 812.7  
DW 81.000 usec  
DE 6.50 usec  
TE 295.0 K  
D1 1.00000000 sec  
TD0 1  
===== CHANNEL f1 =====  
NUC1 1H  
P1 7.70 usec  
PL1 2.00 dB  
SFO1 300.1318534 MHz  
F2 - Processing parameters  
SI 65536  
SF 300.1300234 MHz  
WDW EM  
SSB 0

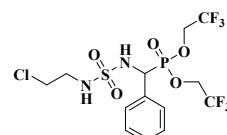

**<sup>1</sup>H NMR Spectrum:** Bis (2,2,2-trifluoroethyl) (((N-(2-chloroethyl) sulfamoyl) amino) (phenyl) methyl) phosphonate (**16p**)

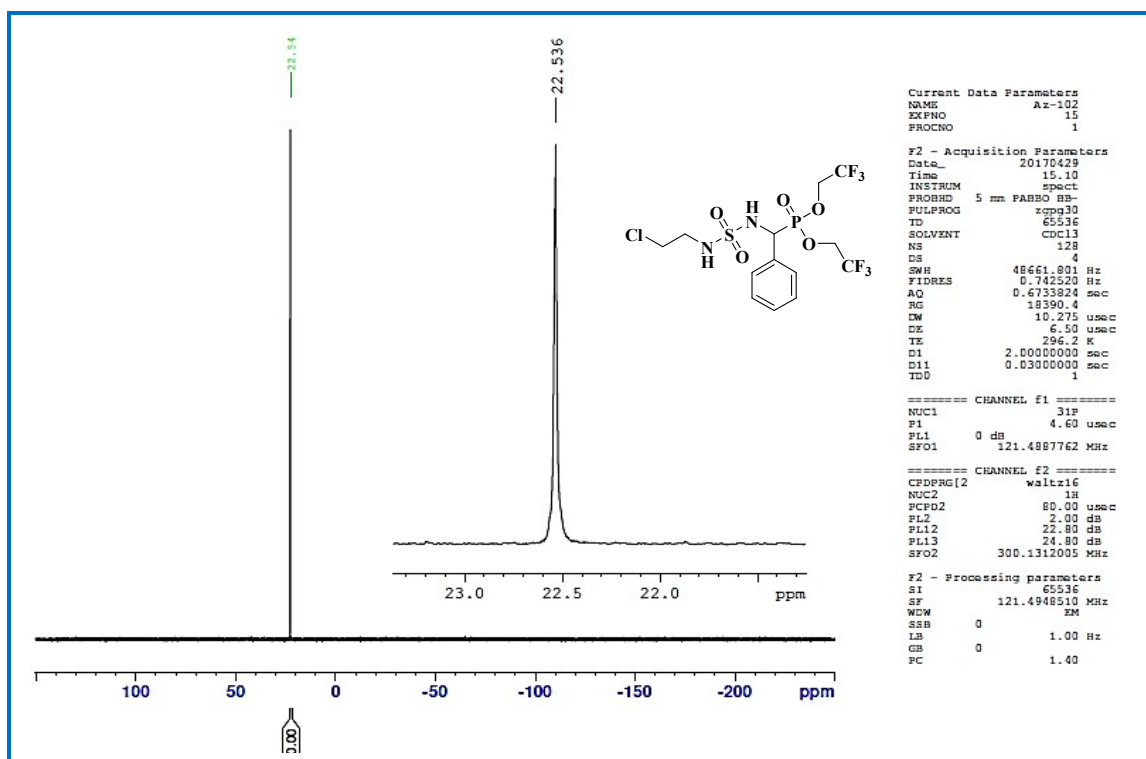

**<sup>31</sup>P NMR Spectrum:** Bis (2,2,2-trifluoroethyl) (((N-(2-chloroethyl) sulfamoyl) amino) (phenyl) methyl) phosphonate (**16p**)

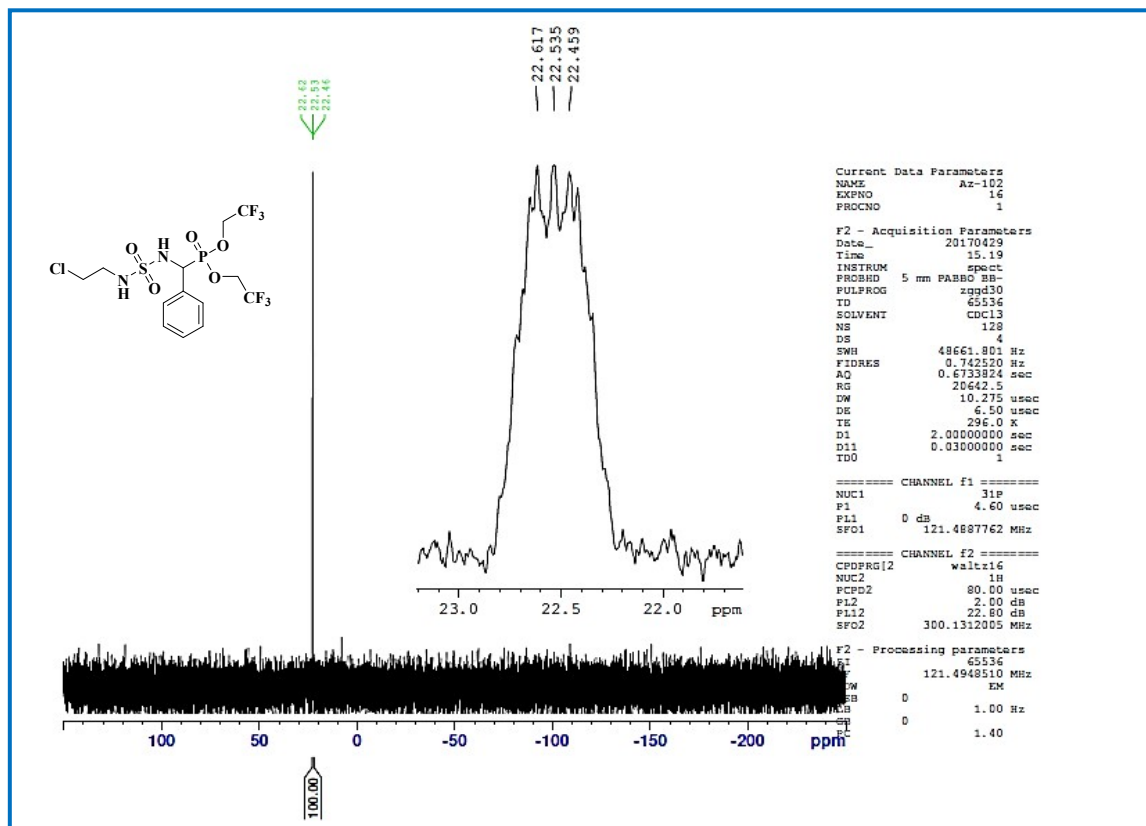

**<sup>31</sup>P NMR Spectrum:** Bis (2,2,2-trifluoroethyl) (((N-(2-chloroethyl) sulfamoyl) amino) (phenyl) methyl) phosphonate (**16p**)

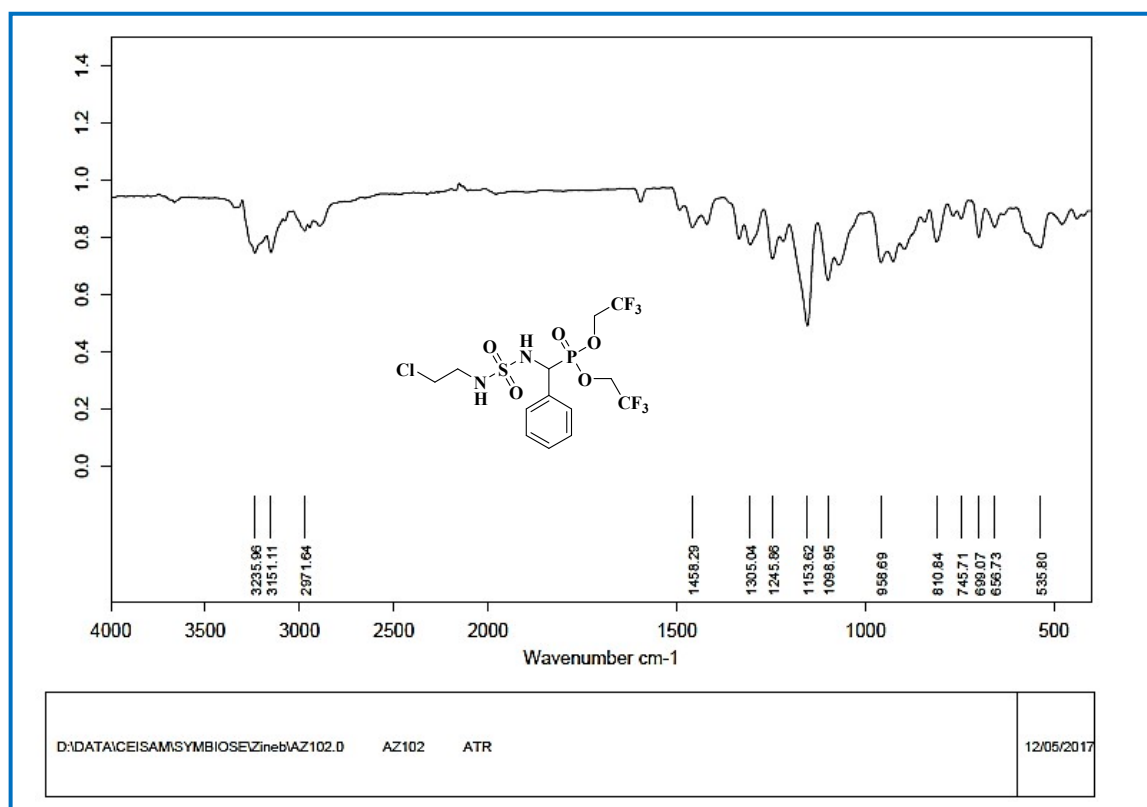

**IR Spectrum:** Bis (2,2,2-trifluoroethyl) (((N-(2-chloroethyl) sulfamoyl) amino) (phenyl) methyl) phosphonate (16p)

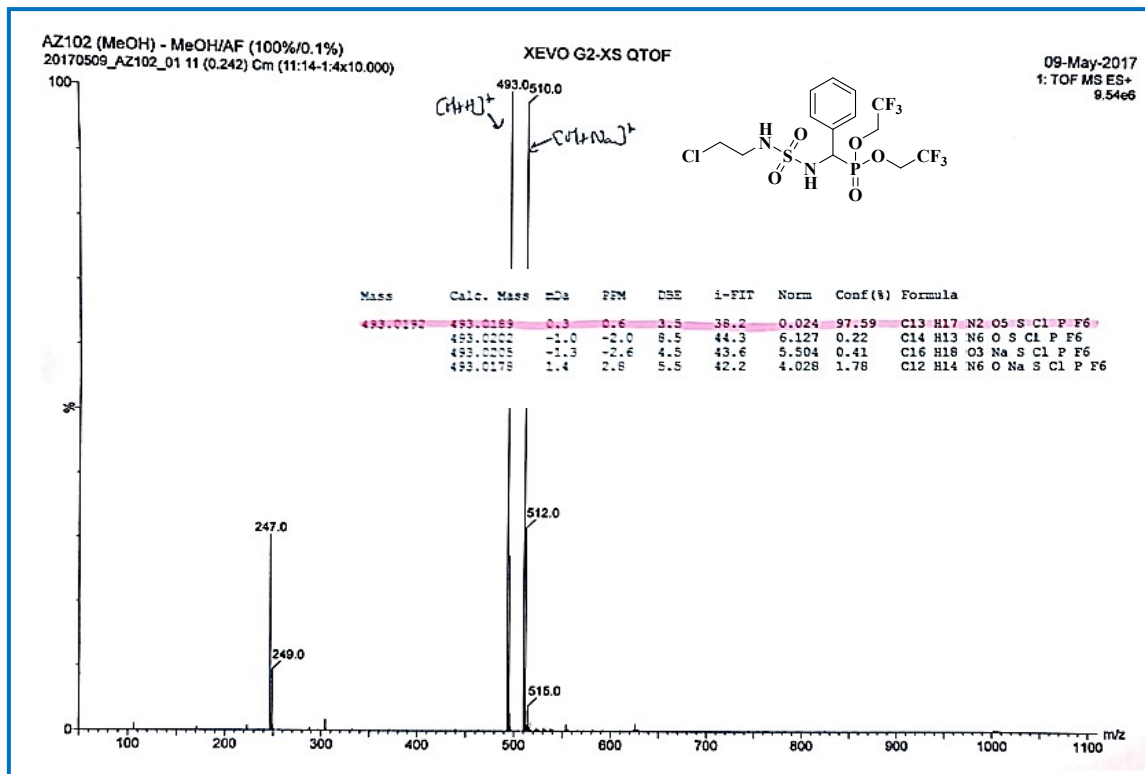

**MS Spectrum:** Bis (2,2,2-trifluoroethyl) (((N-(2-chloroethyl) sulfamoyl) amino) (phenyl) methyl) Phosphonate (16p)

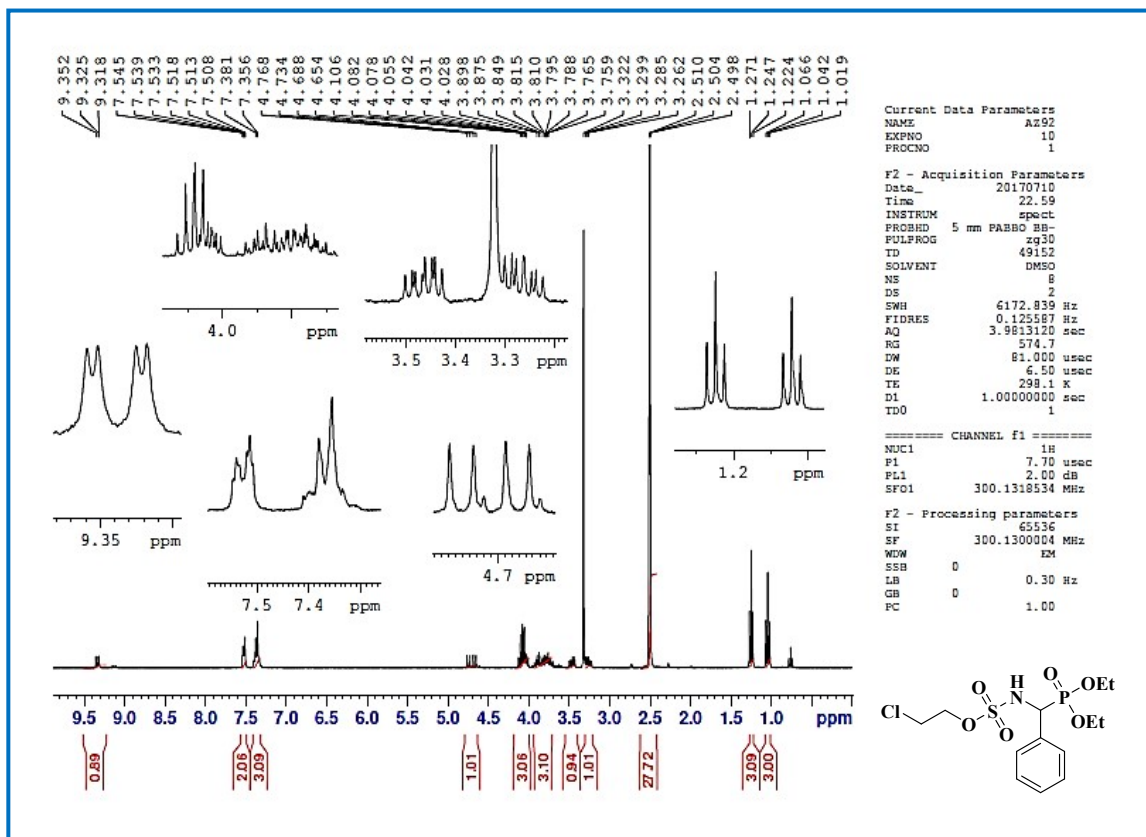

**<sup>1</sup>H NMR Spectrum: 2-Chloroethyl ((diethoxyphosphoryl)(phenyl)methyl)sulfamate (18a)**

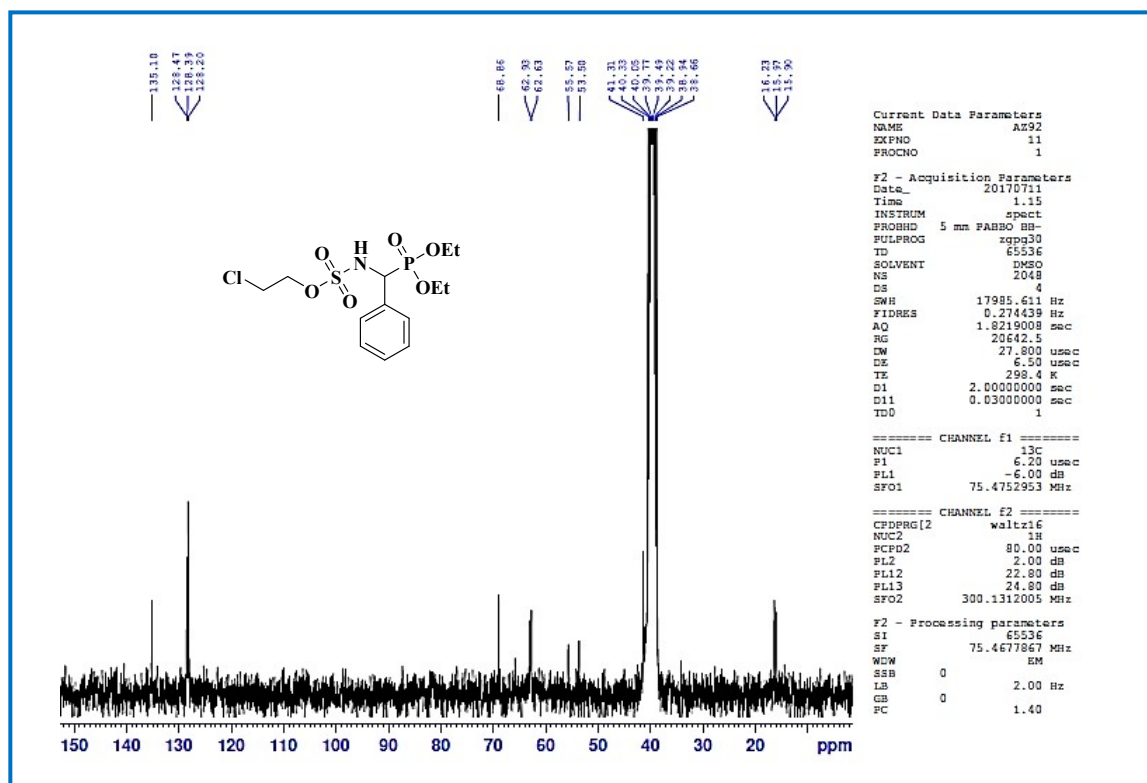

**<sup>13</sup>C NMR Spectrum: 2-Chloroethyl ((diethoxyphosphoryl)(phenyl)methyl)sulfamate (18a)**

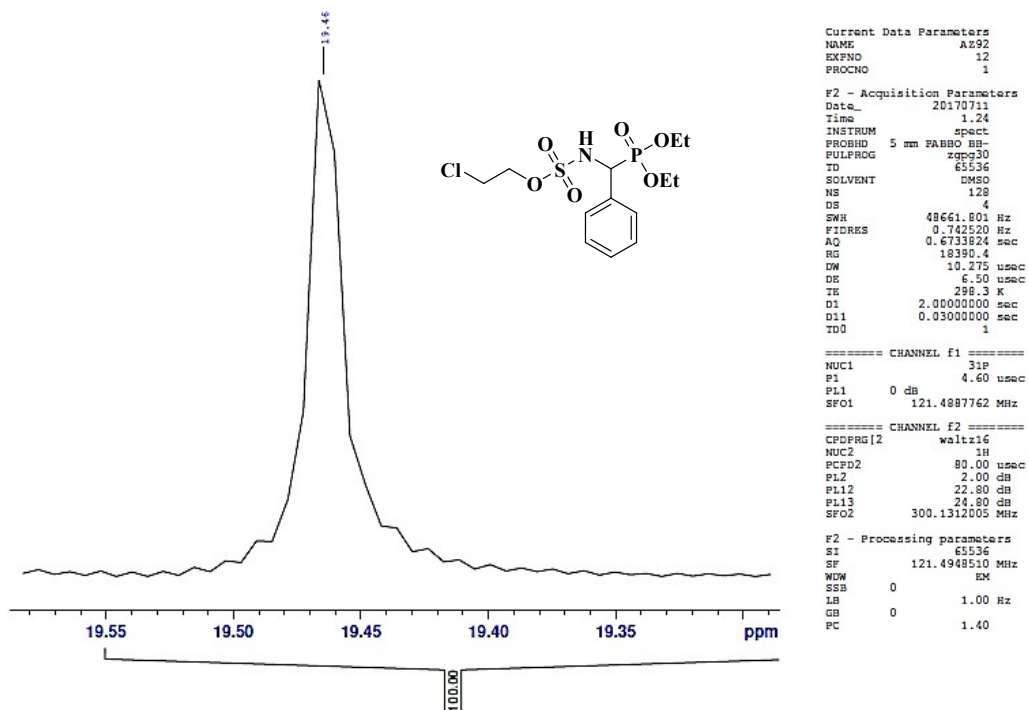

**<sup>31</sup>P NMR Spectrum: 2-Chloroethyl ((diethoxyphosphoryl)(phenyl)methyl)sulfamate (18a)**

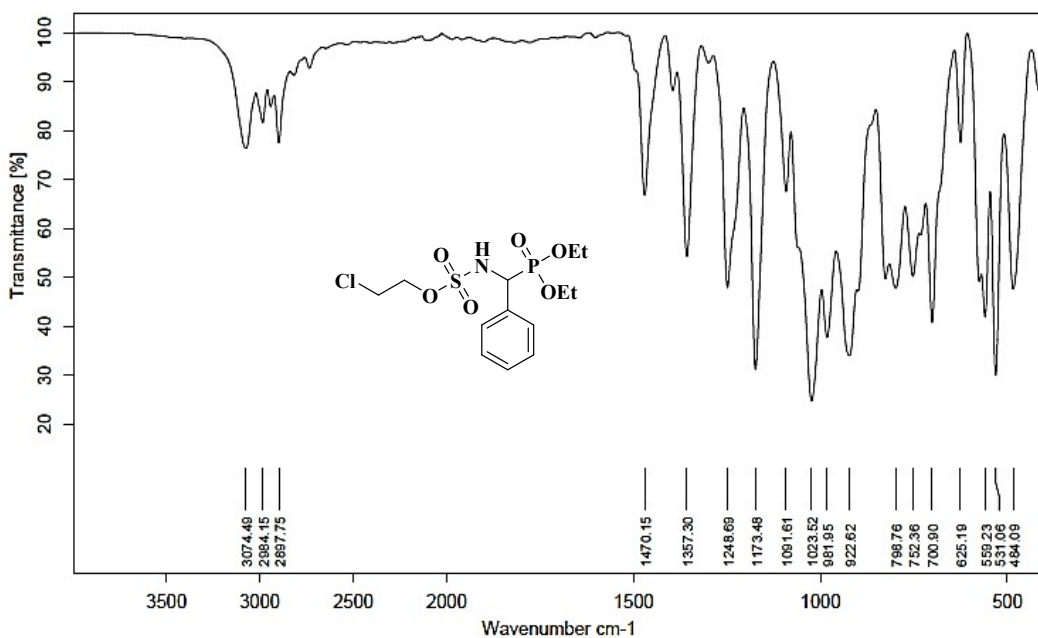

D:\DATA\CEISAM\SYMBIOSE\Zineb\VAZ-57.0

AZ-57

ATR

07/02/2017

**IR Spectrum: 2-Chloroethyl ((diethoxyphosphoryl)(phenyl)methyl)sulfamate (18a)**

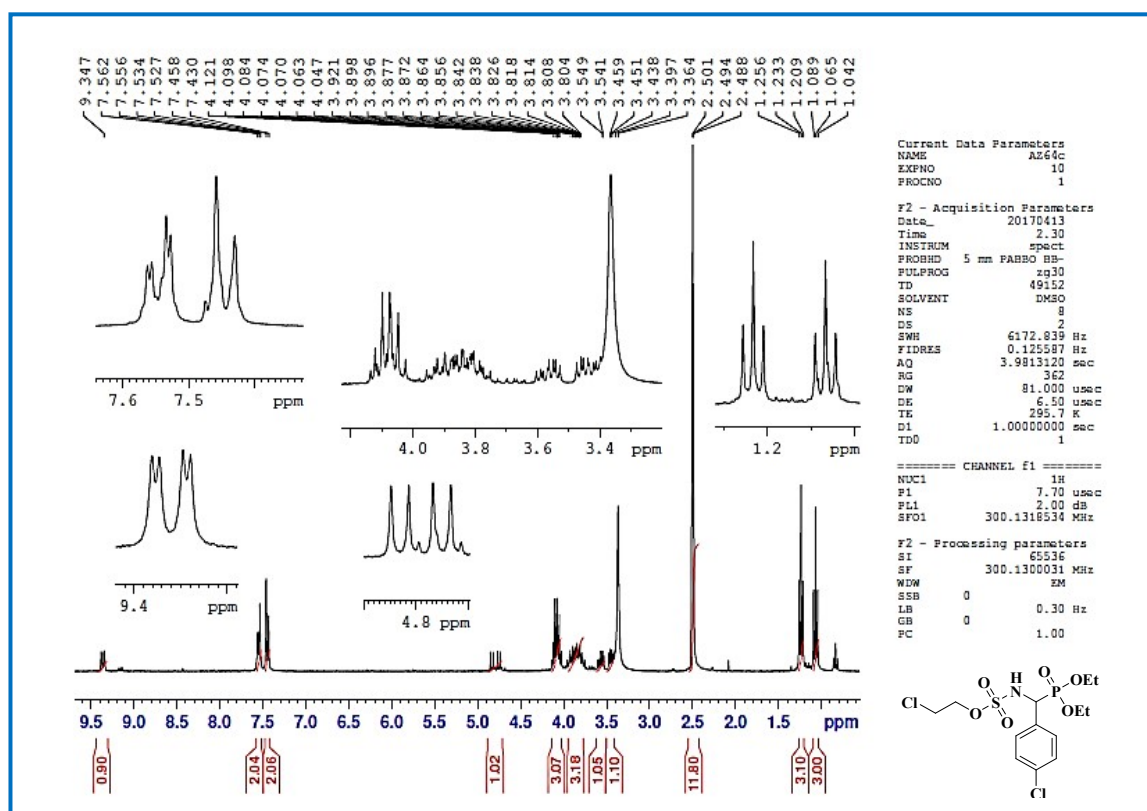

**<sup>1</sup>H NMR Spectrum: 2-Chloroethyl ((4-chlorophenyl)(diethoxyphosphoryl)methyl)sulfamate (18c)**

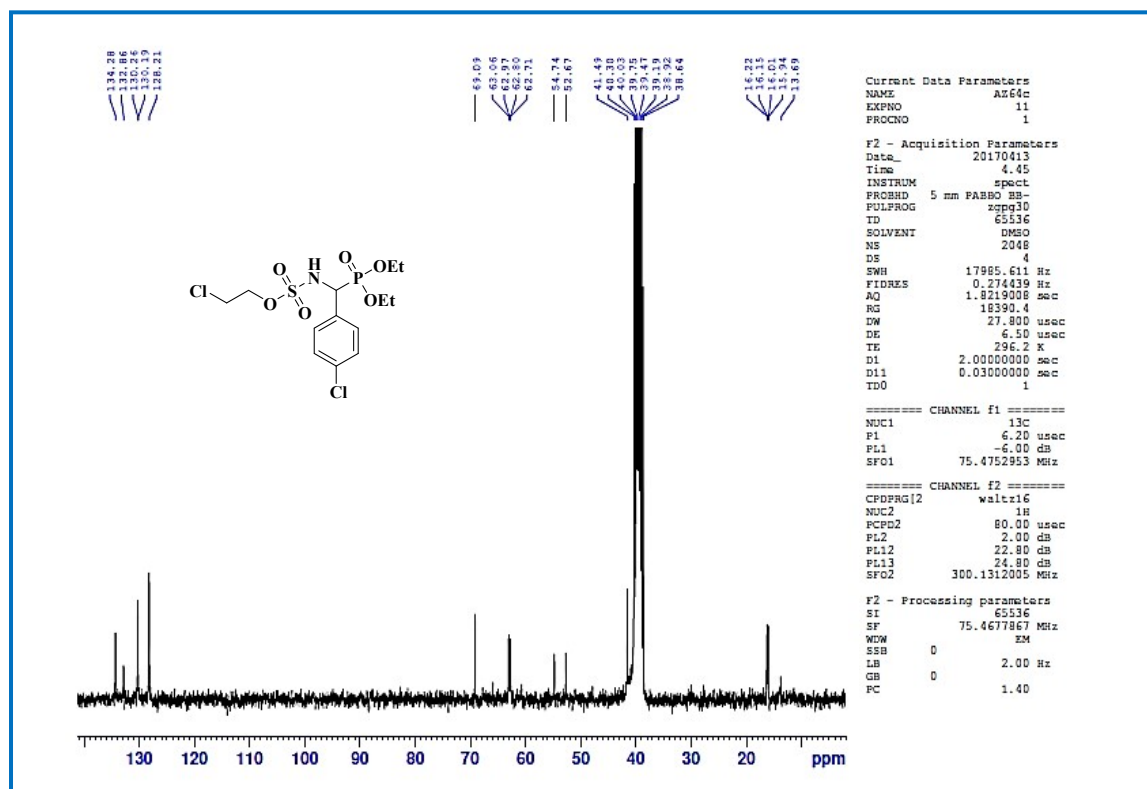

**<sup>13</sup>C NMR Spectrum: 2-Chloroethyl ((4-chlorophenyl)(diethoxyphosphoryl)methyl)sulfamate (18c)**

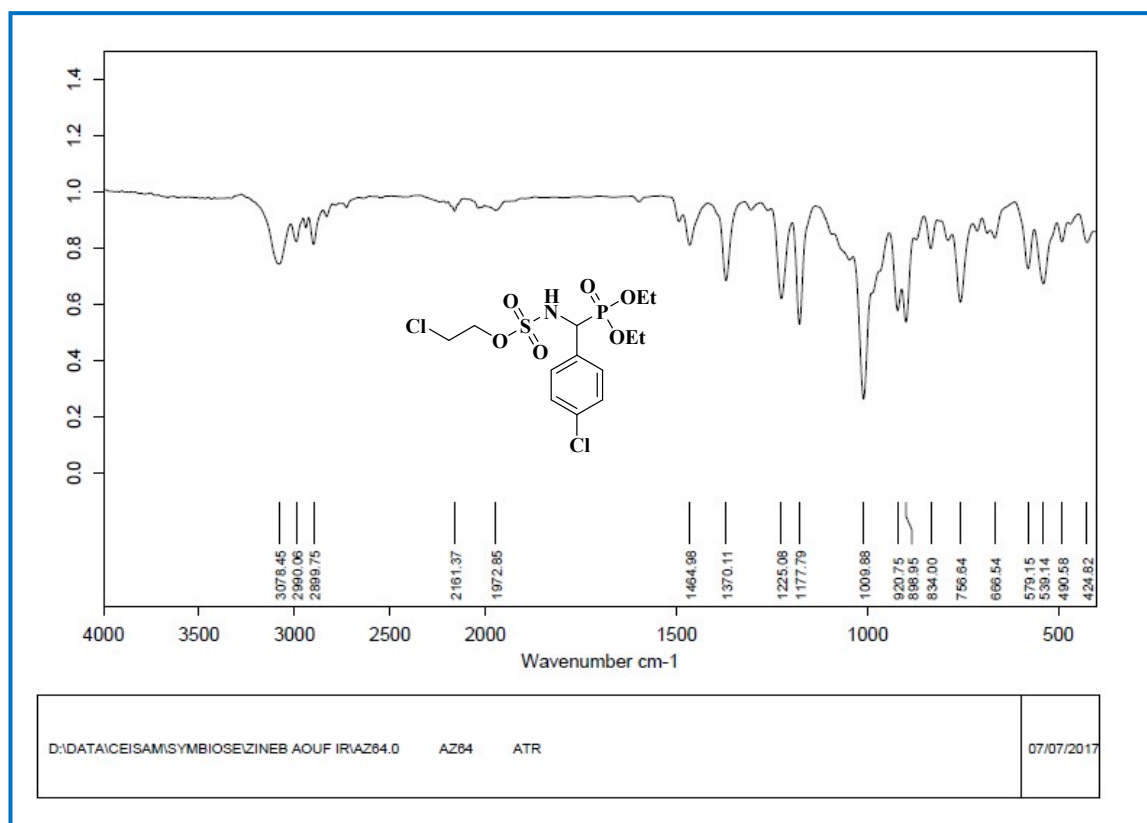

**IR Spectrum: 2-Chloroethyl ((4-chlorophenyl)(diethoxyphosphoryl)methyl)sulfamate (18c)**

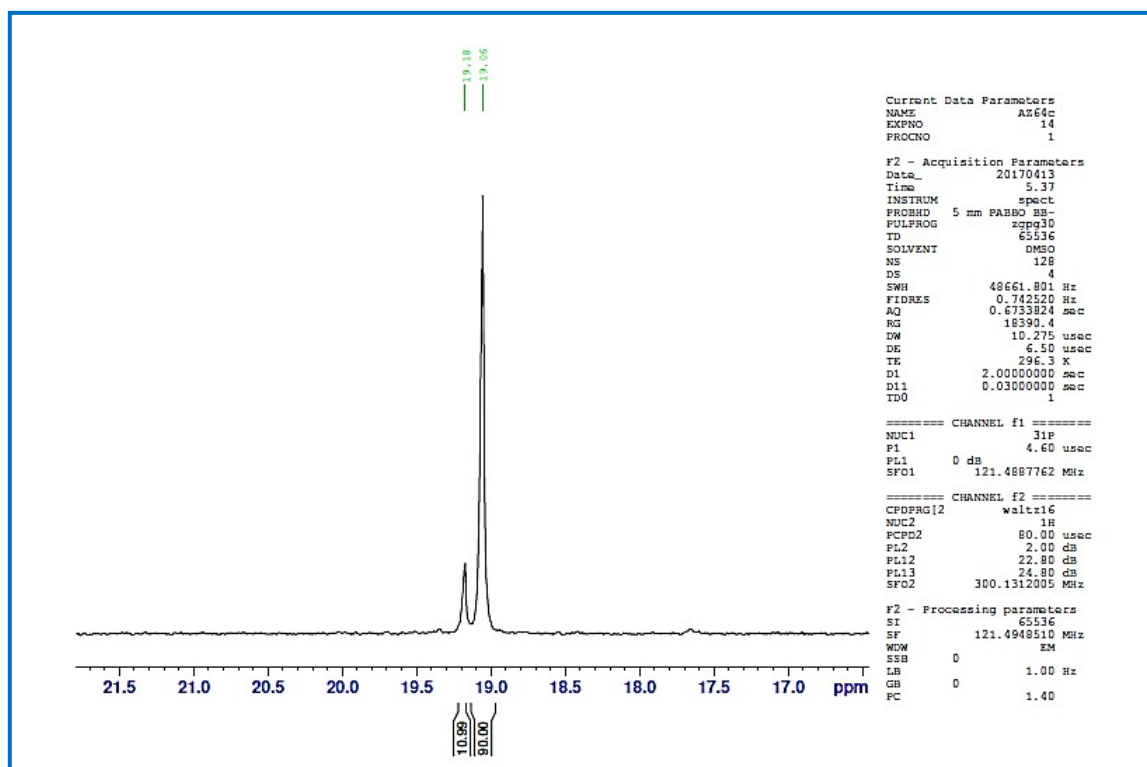

**NMR P<sup>31</sup> Spectrum: 2-Chloroethyl ((4-chlorophenyl)(diethoxyphosphoryl)methyl)sulfamate (18c)**

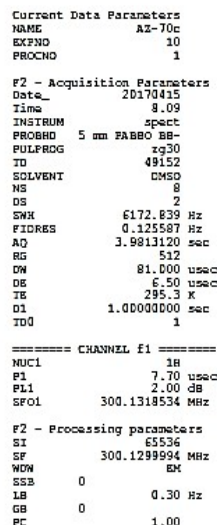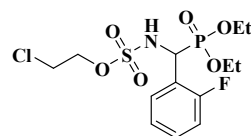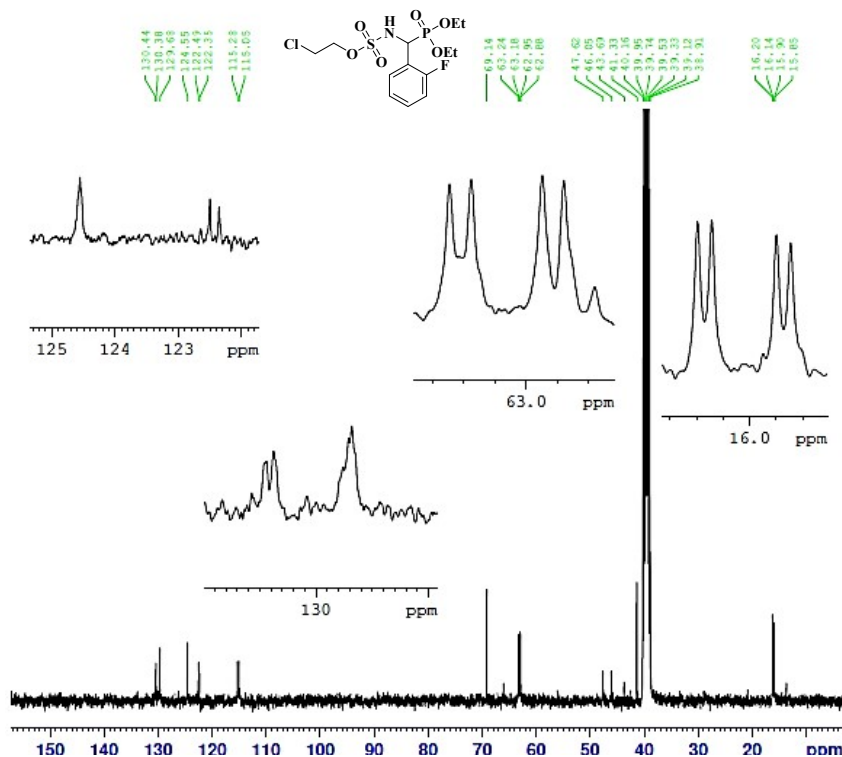

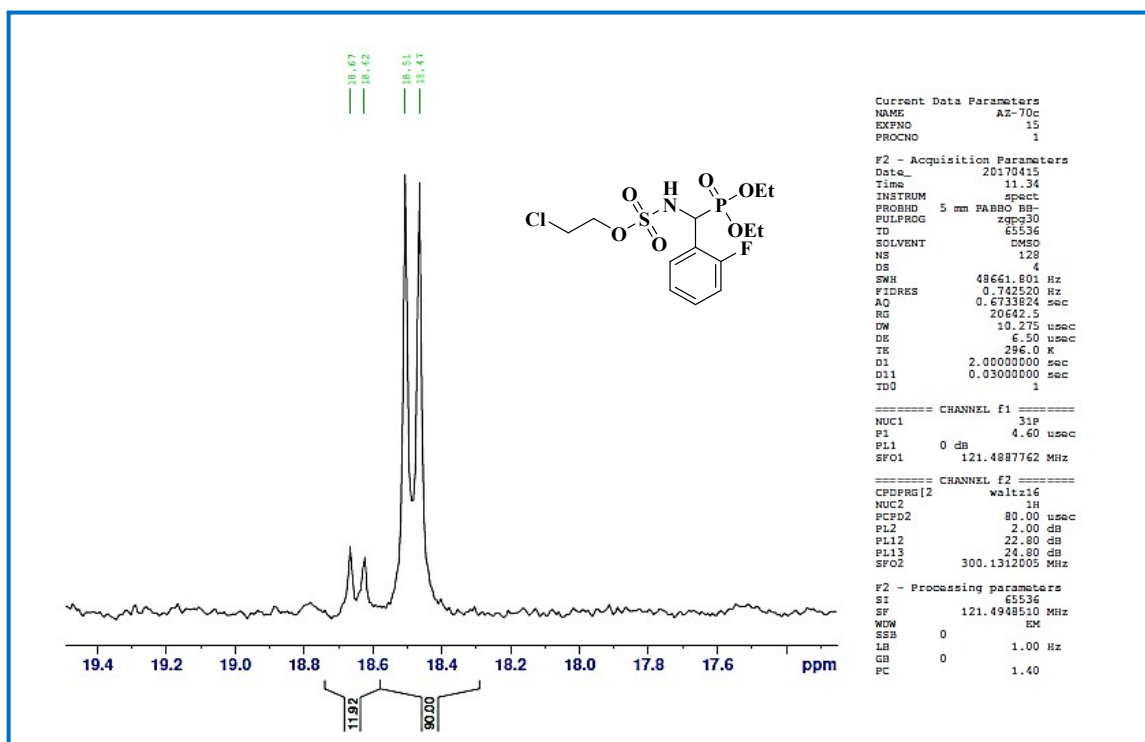

**<sup>31</sup>P NMR Spectrum: 2-Chloroethyl ((diethoxyphosphoryl)(2-fluorophenyl)methyl)sulfamate (18d)**

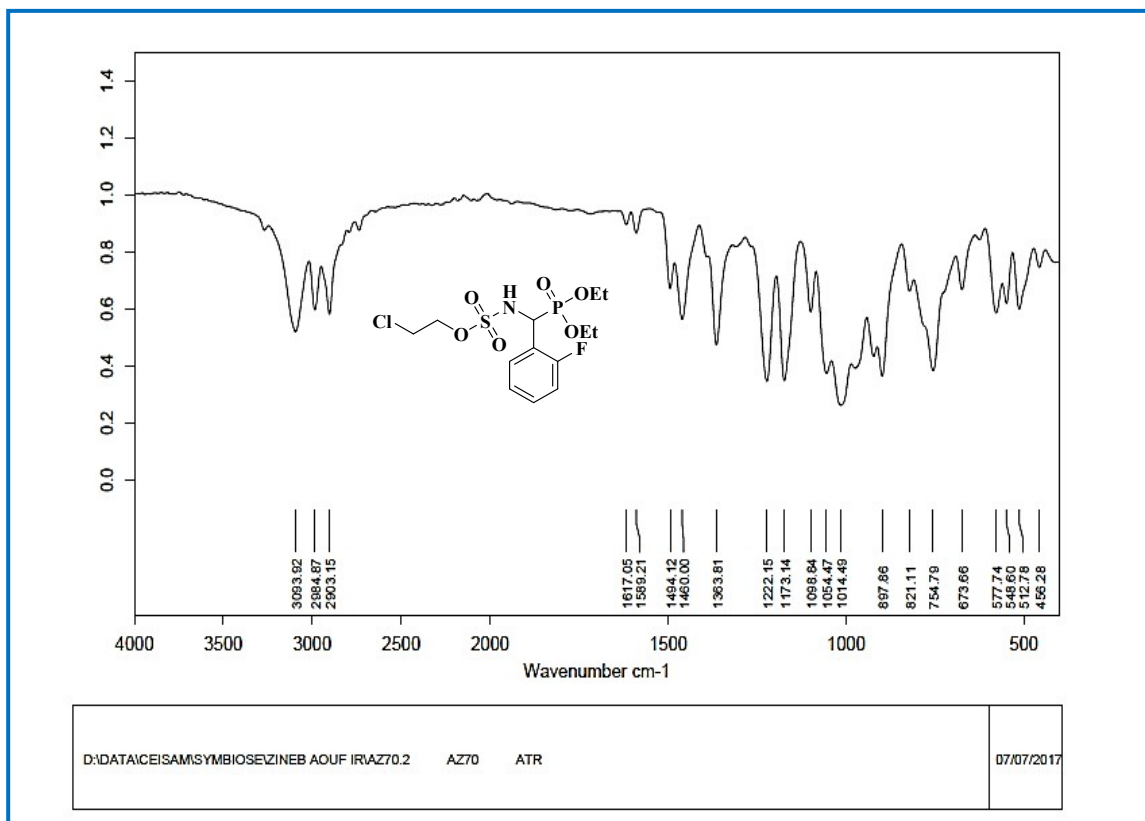

**IR Spectrum: 2-Chloroethyl ((diethoxyphosphoryl)(2-fluorophenyl)methyl)sulfamate (18d)**

AZ70 (DCM) - MeOH/AF (100%/0.1%) - vials Waters  
20170413\_AZ70\_01 10 (0.225) Cm (10.13)

XEVO G2-XS QTOF

13-Apr-2017  
1: TOF MS ES+  
2.66e7

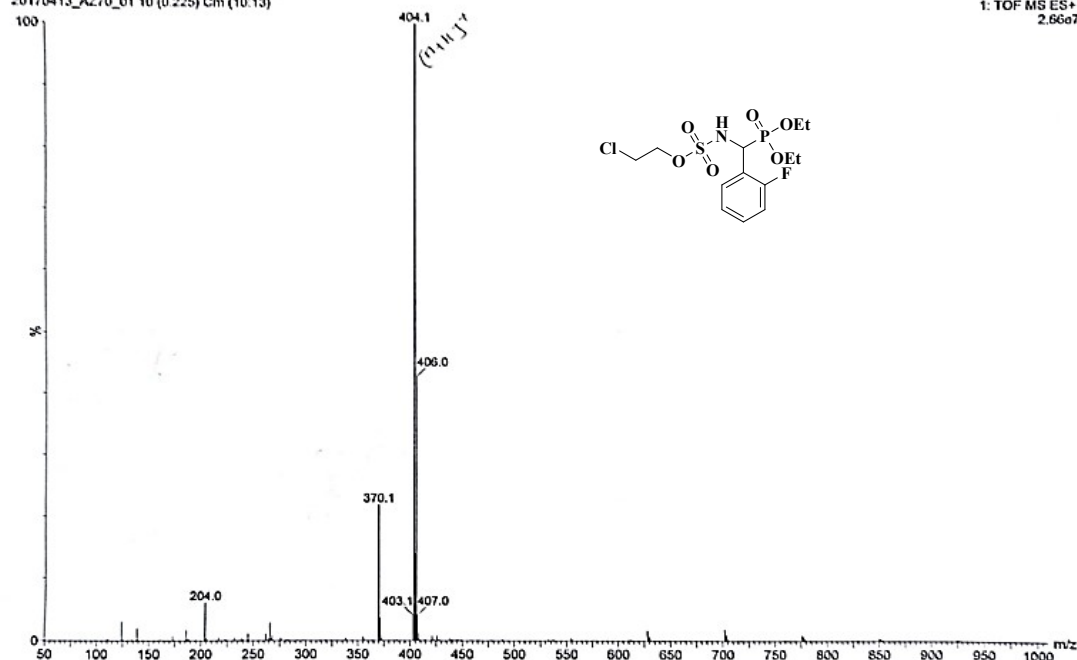

**MS Spectrum: 2-Chloroethyl ((diethoxyphosphoryl)(2-fluorophenyl)methyl)sulfamate (18d)**

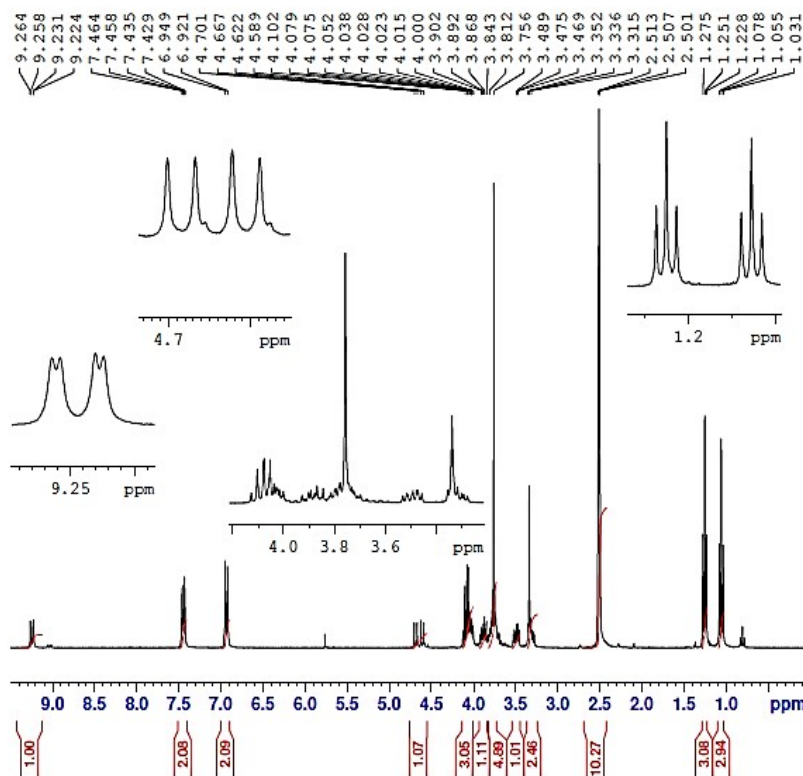

Current Data Parameters  
NAME AZ82C  
EXPNO 10  
PROCNO 1  
F2 - Acquisition Parameters  
Date\_ 20170330  
Time 20.11  
INSTRUM spect  
PROBHD 5 mm PABBO BB-  
PULPROG zg30  
TD 49152  
SOLVENT DMSO  
NS 8  
DS 2  
SWH 6172.839 Hz  
FIDRES 0.125587 Hz  
AQ 3.9813120 sec  
RG 362  
DW 81.000 usec  
DE 6.50 usec  
TE 296.2 K  
D1 1.00000000 sec  
TD0 1

===== CHANNEL f1 =====  
NUC1 1H  
P1 7.70 usec  
PL1 2.00 dB  
SFO1 300.1319534 MHz  
F2 - Processing parameters  
SI 65536  
SF 300.1299994 MHz  
WDW EM  
SSB 0  
LB 0.30 Hz  
GB 0  
PC 1.00

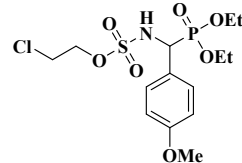

**<sup>1</sup>H NMR Spectrum: 2-Chloroethyl ((diethoxyphosphoryl)(4-methoxyphenyl)methyl)sulfamate (18e)**

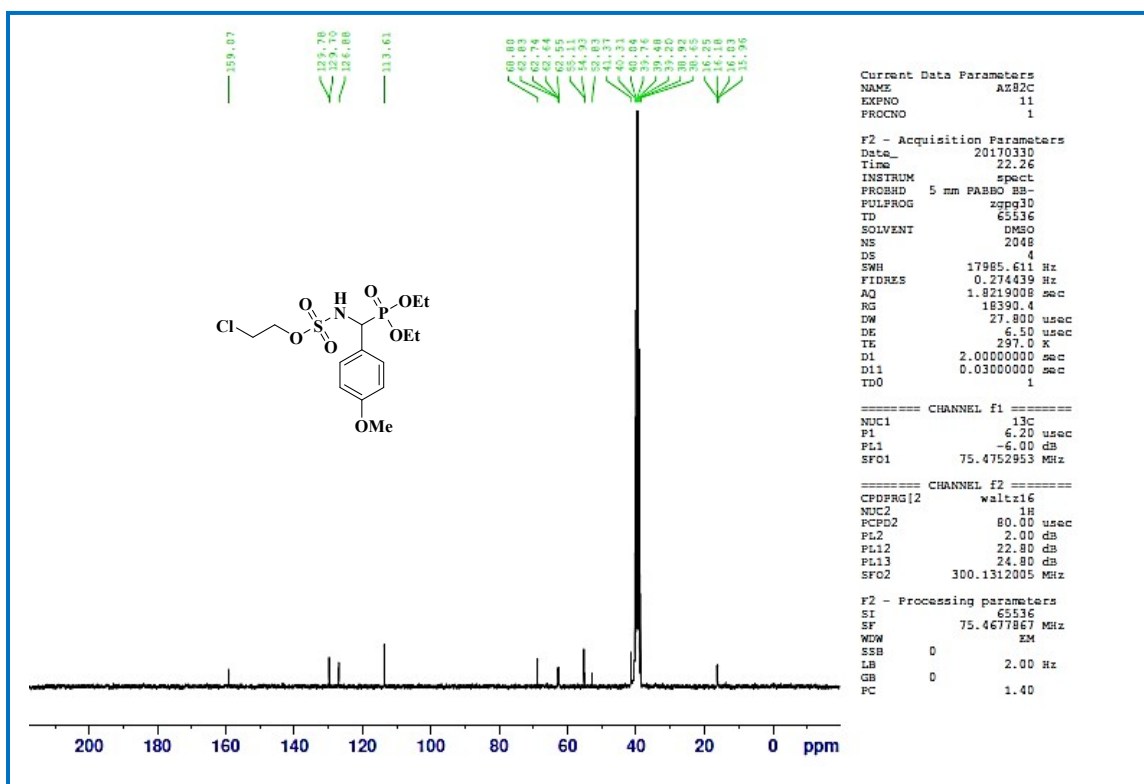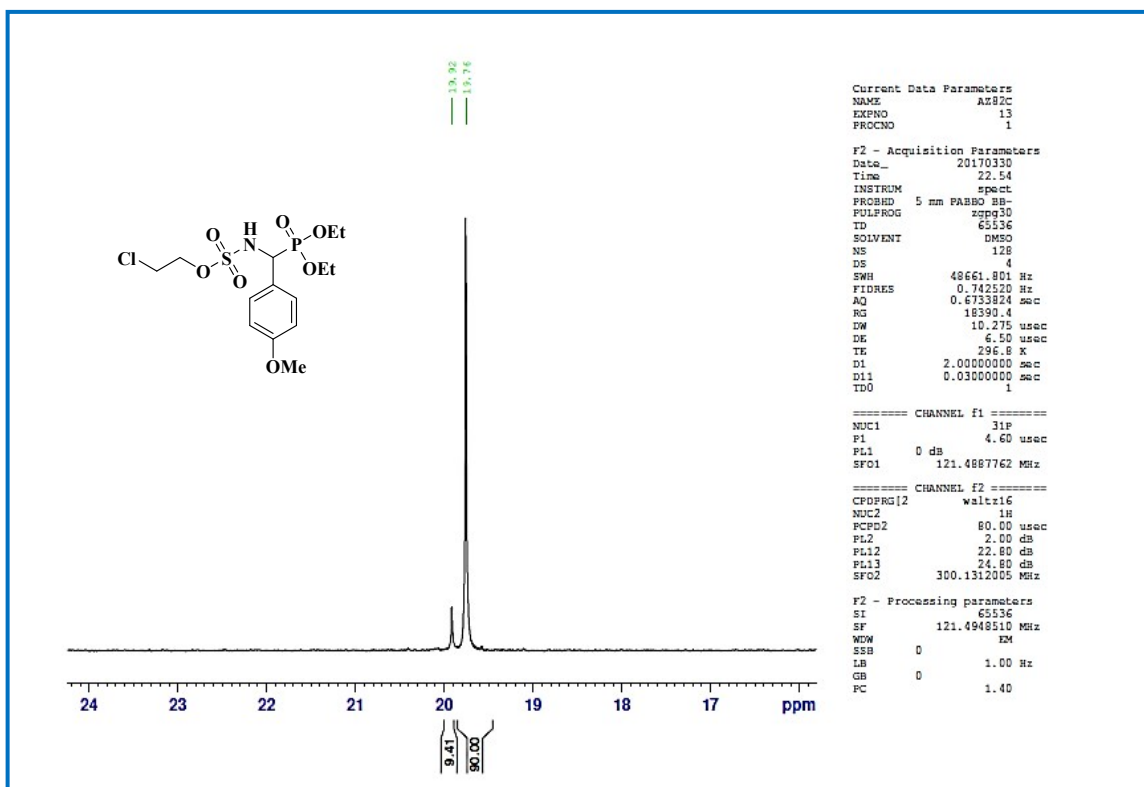

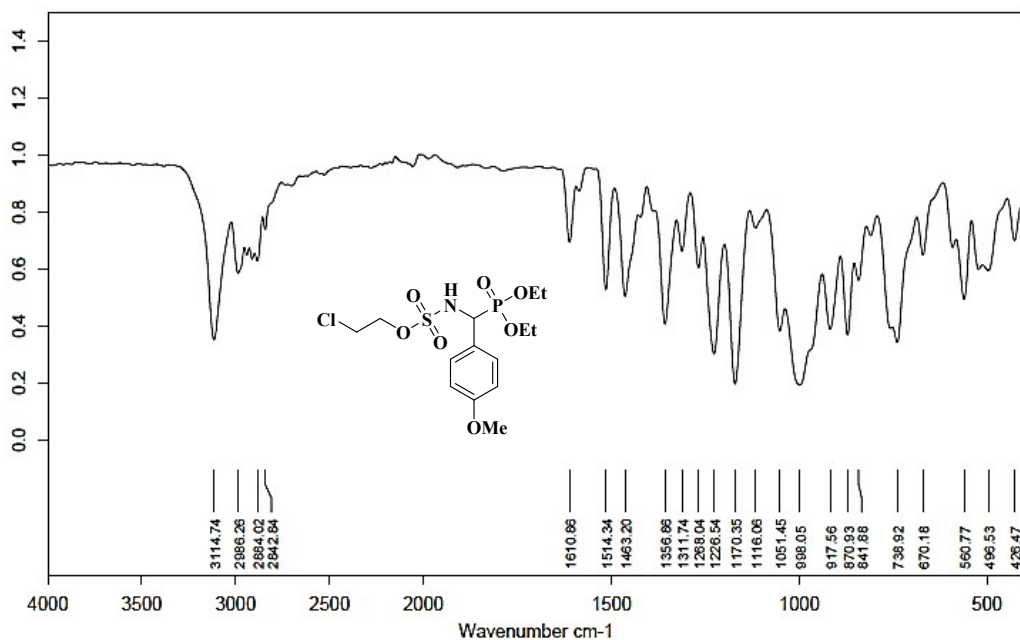

D:\DATA\CEISAM\SYMBIOSE\ZINEB AOUF IR\AZ82.1

AZ82

ATR

07/07/2017

**IR Spectrum: 2-Chloroethyl ((diethoxyphosphoryl)(4-methoxyphenyl)methyl)sulfamate (18e)**

AZ82 (MeOH) - H<sub>2</sub>O/MeOH/AF (50%/50%/0.1%)  
20170331\_AZ82\_01 9 (0.209) Cm (8.11-(1:3\*36.49))

XEVO G2-XS QTOF

31-Mar-2017  
1: TOF MS ES+  
3.16e7

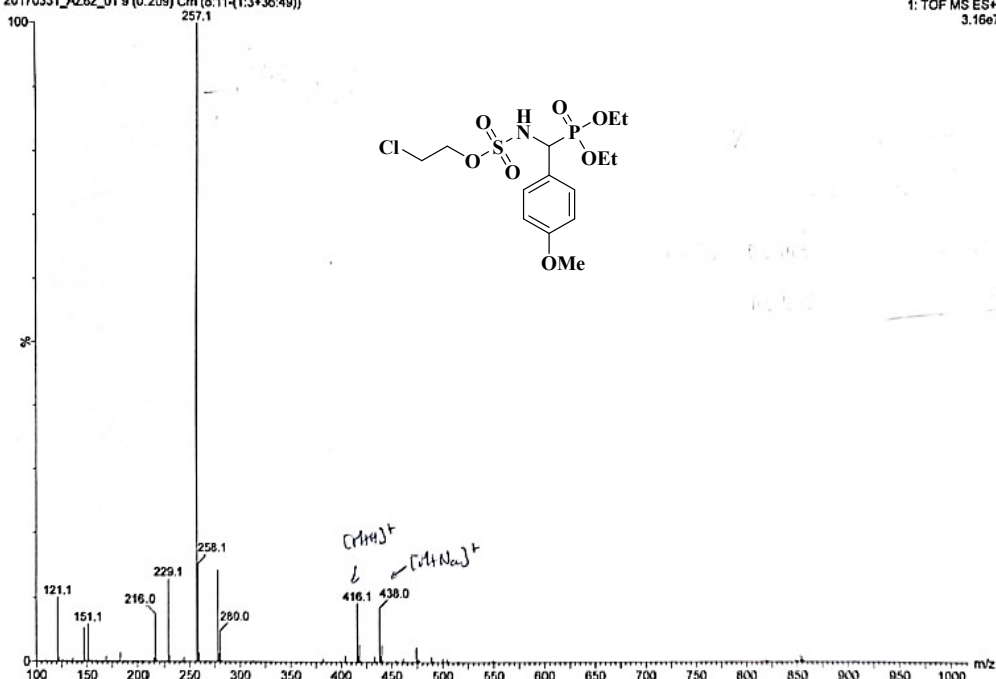

**MS Spectrum: 2-Chloroethyl ((diethoxyphosphoryl)(4-methoxyphenyl)methyl)sulfamate (18e)**

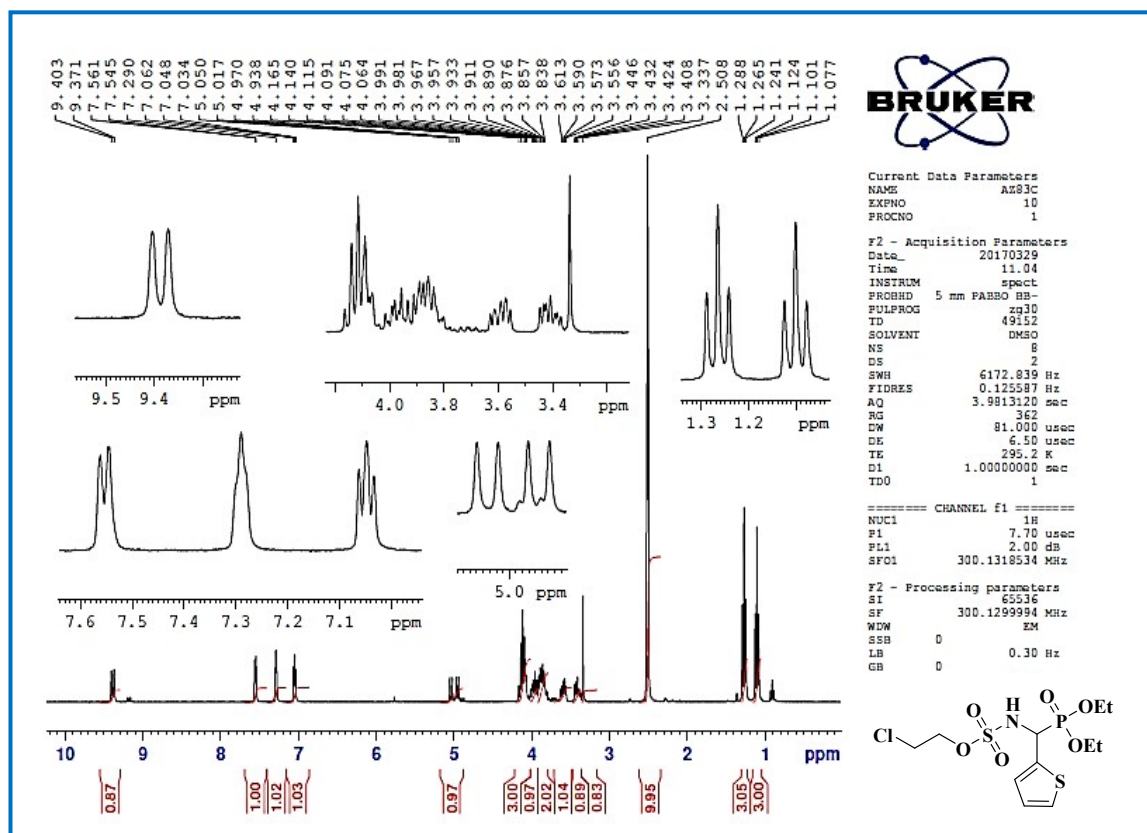

**<sup>1</sup>H NMR Spectrum: 2-Chloroethyl ((diethoxyphosphoryl)(thiophen-2-yl)methyl)sulfamate (18k)**

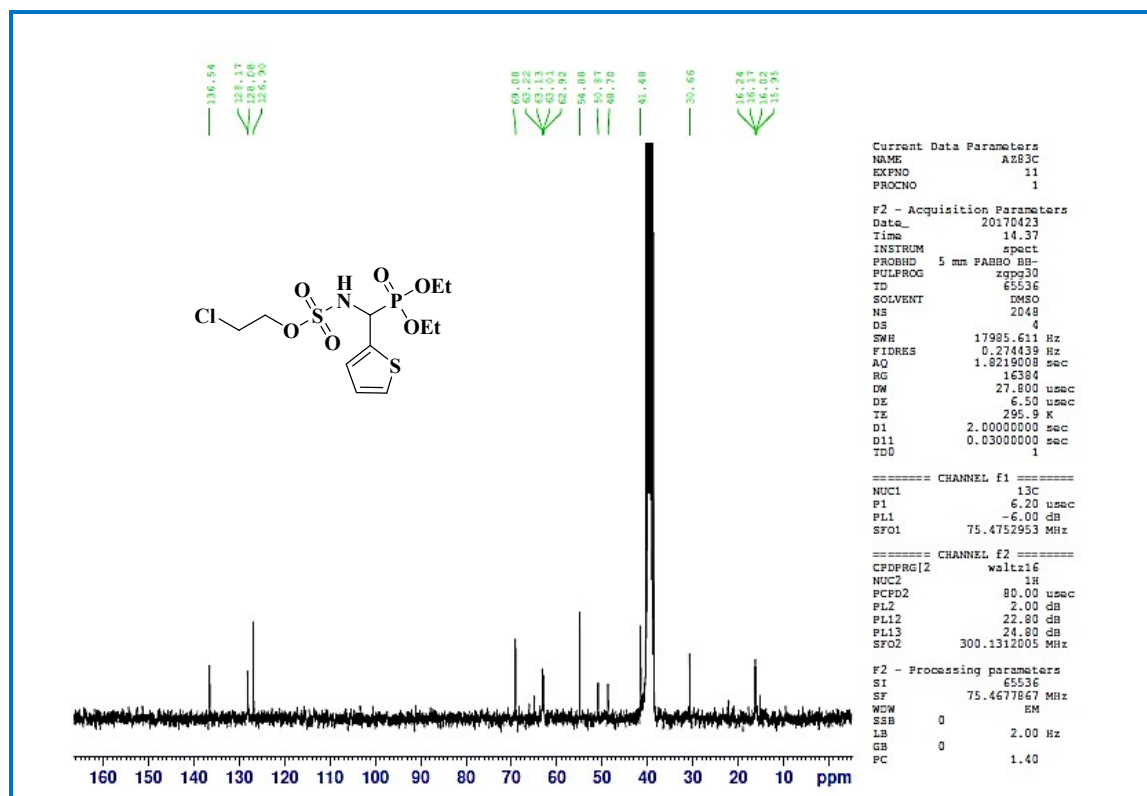

**<sup>13</sup>C NMR Spectrum: 2-Chloroethyl ((diethoxyphosphoryl)(thiophen-2-yl)methyl)sulfamate (18k)**

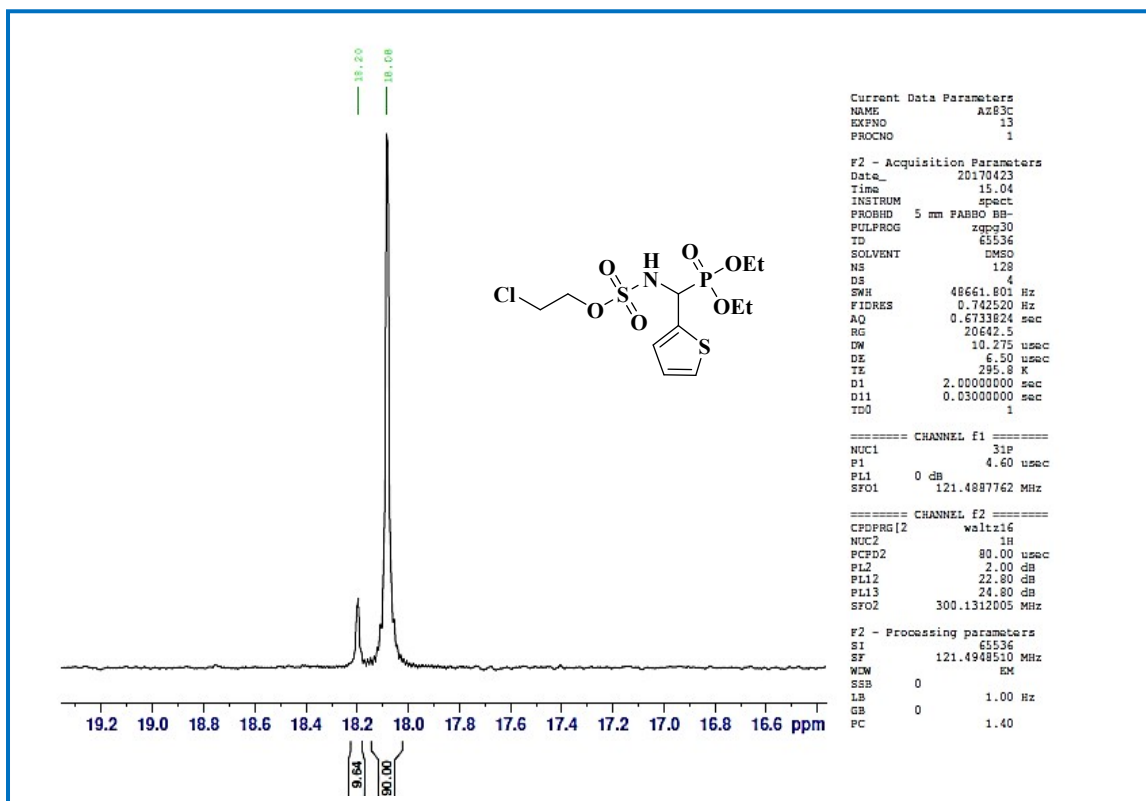

***<sup>31</sup>P NMR Spectrum: 2-Chloroethyl ((diethoxyphosphoryl)(thiophen-2-yl)methyl)sulfamate (18k)***

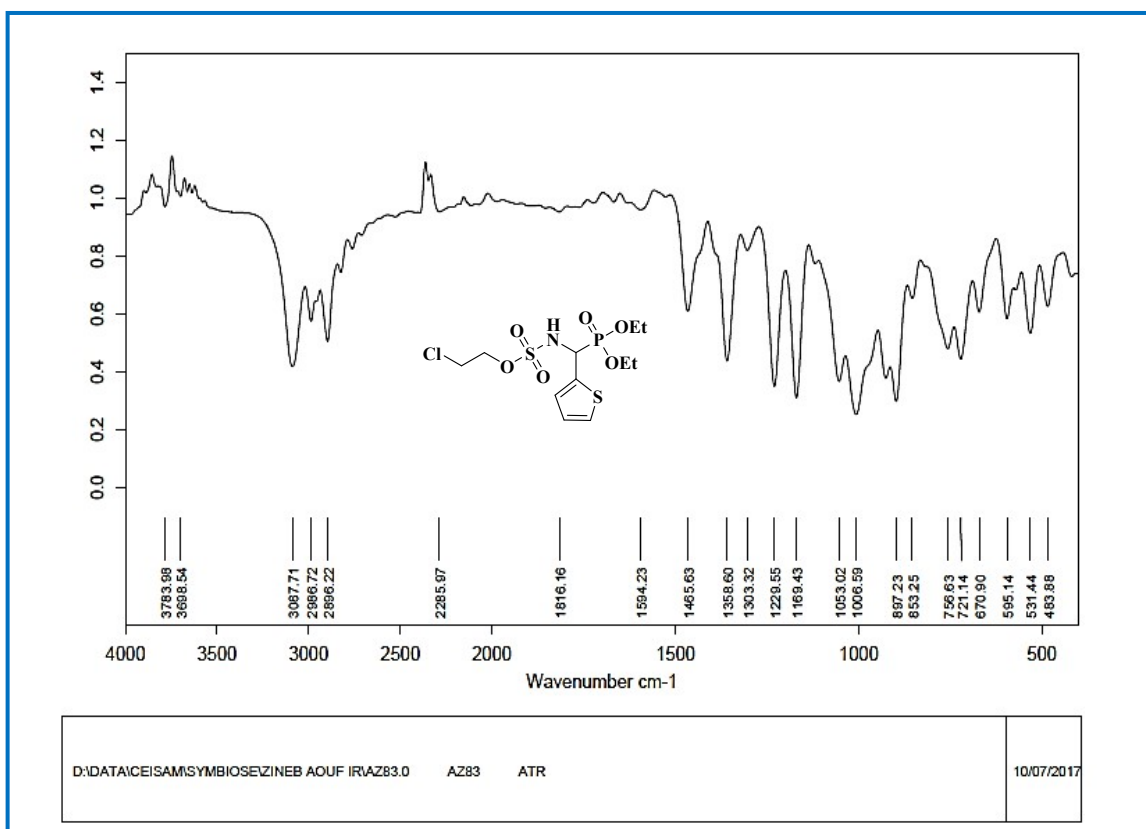

***IR Spectrum: 2-Chloroethyl ((diethoxyphosphoryl)(thiophen-2-yl)methyl)sulfamate (18k)***

AZ83 (DCM) - MeOH/AF (100%/0.1%) - Vials Waters  
20170413\_AZ83\_01 11 (0.242) Cm (11:12)

XEVO G2-XS QTOF

13-Apr-2017  
1: TOF MS ES+  
1.15e7

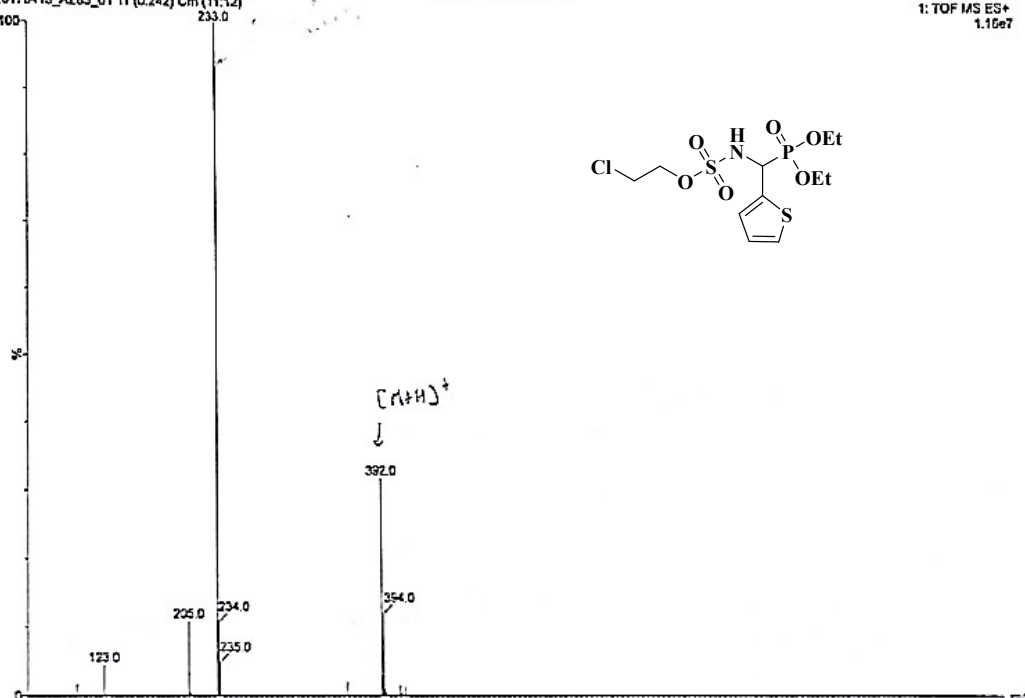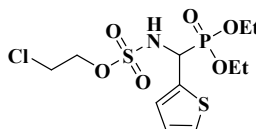

**MS Spectrum:** 2-Chloroethyl ((diethoxyphosphoryl)(thiophen-2-yl)methyl)sulfamate (**18k**)

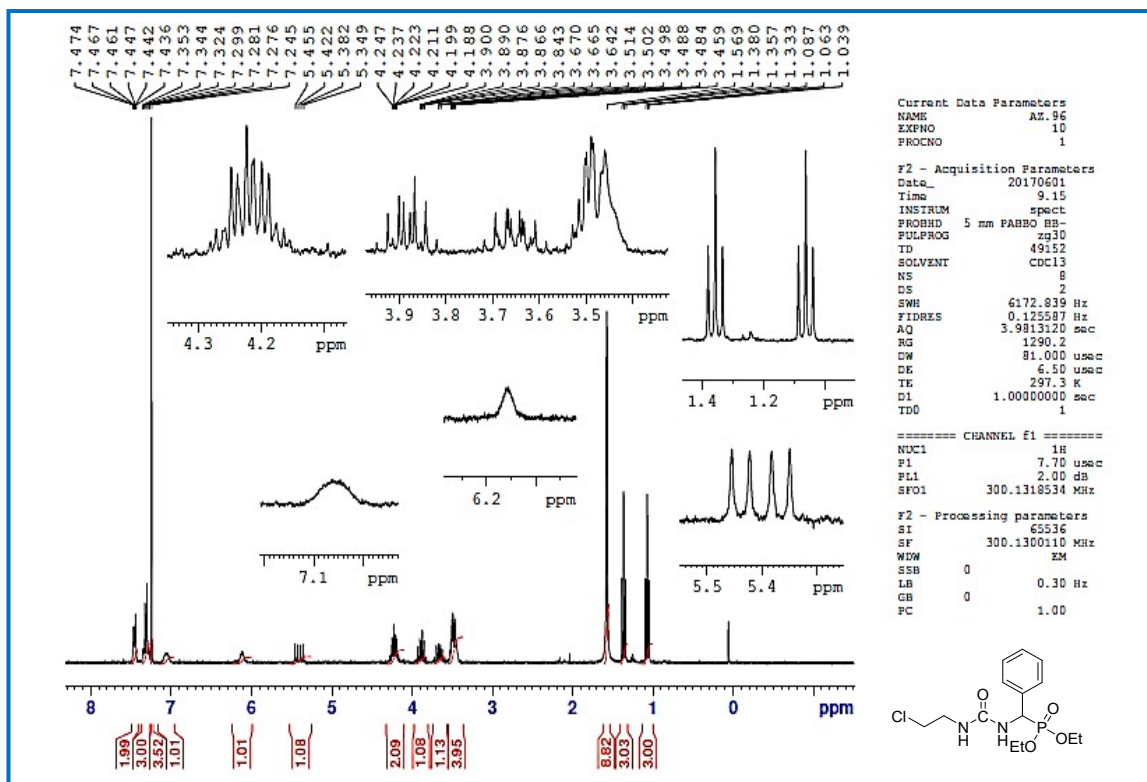

**<sup>1</sup>H NMR Spectrum:** Diethyl ((3-(2-chloroethyl)ureido)(phenyl)methyl)phosphonate (**20**)

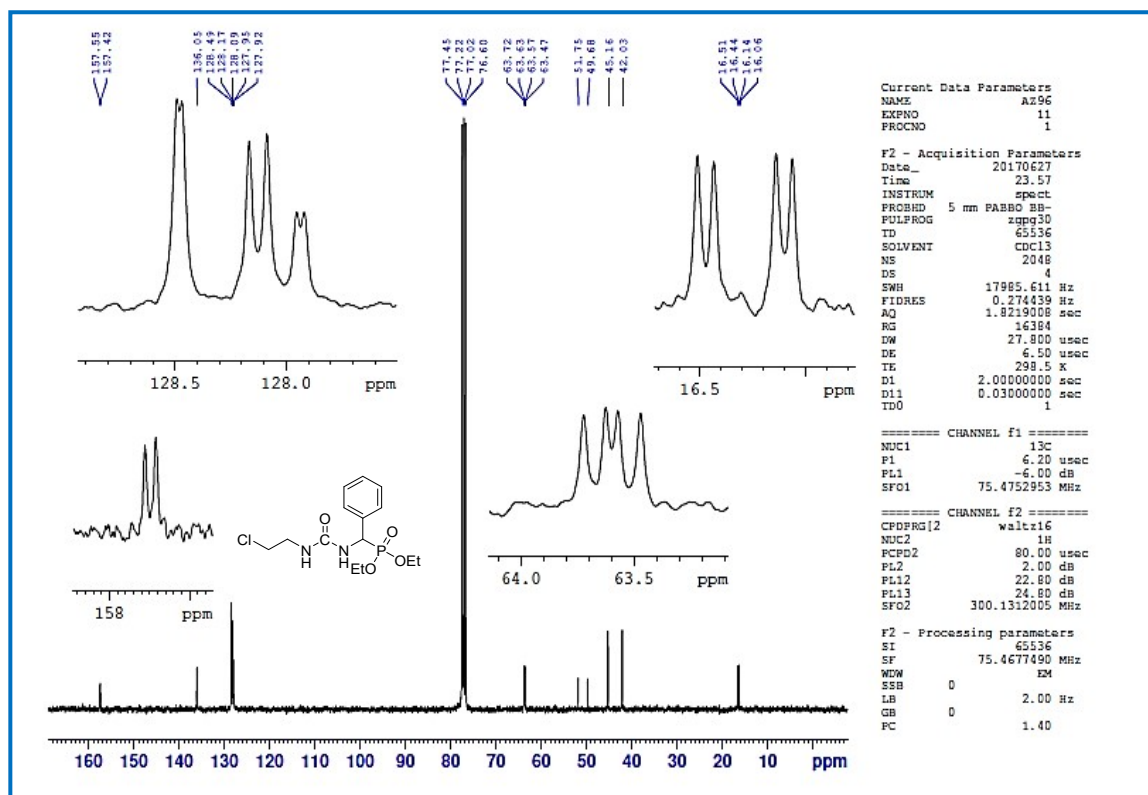

**<sup>13</sup>C NMR Spectrum:** Diethyl ((3-(2-chloroethyl)ureido)(phenyl)methyl)phosphonate (**20**)

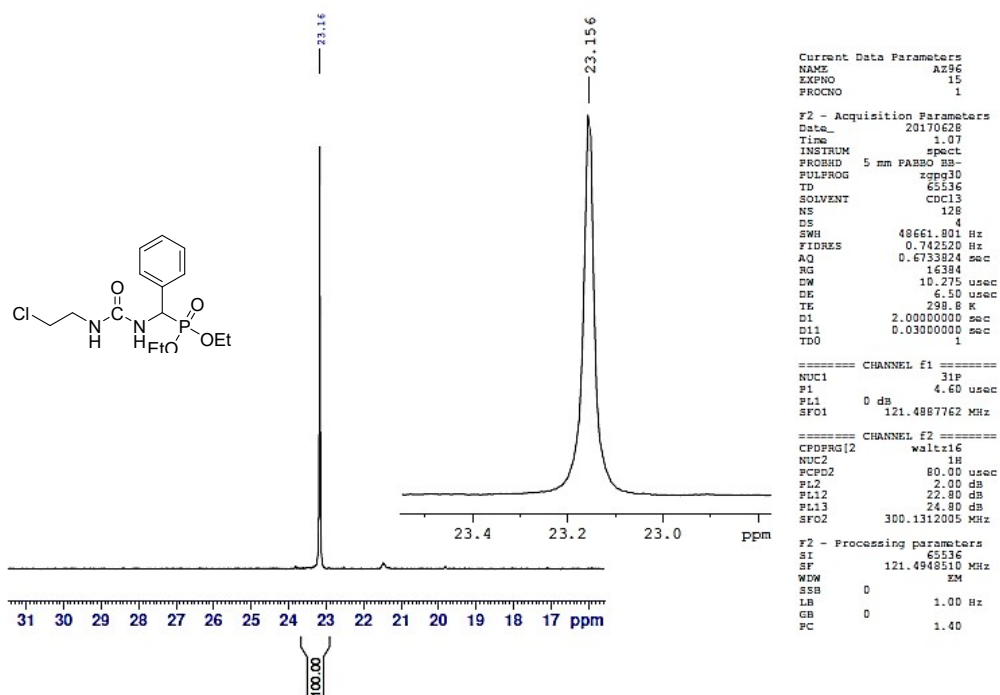

**<sup>31</sup>P NMR Spectrum:** Diethyl ((3-(2-chloroethyl)ureido)(phenyl)methyl)phosphonate (**20**)

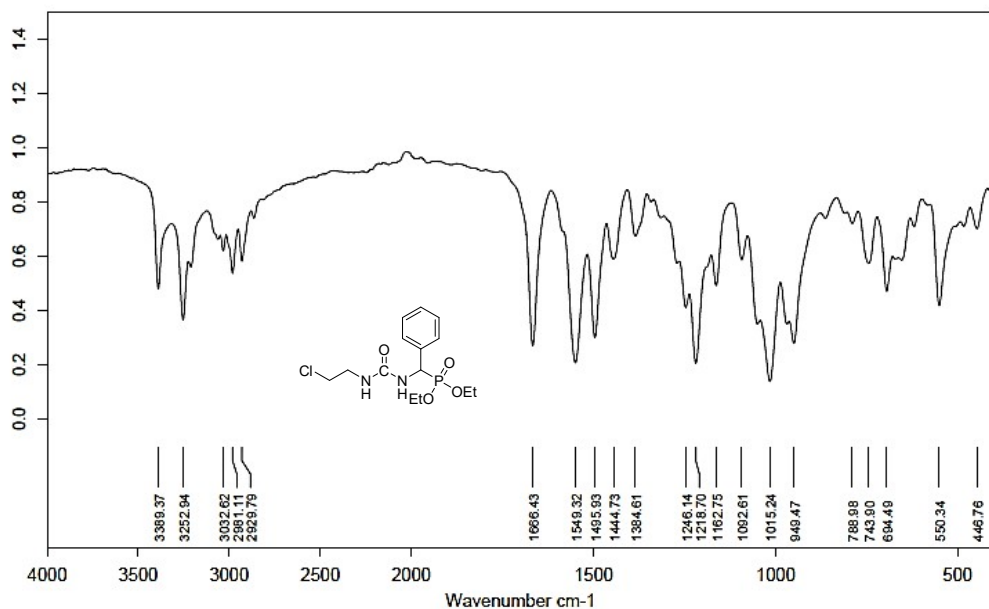

D:\DATA\CE\ISAM\SYMBIOSE\ZINEB AOUF IRI\AZ96.0 AZ96 ATR

13/07/2017

**IR Spectrum:** Diethyl ((3-(2-chloroethyl)ureido)(phenyl)methyl)phosphonate (**20**)

AZ96 (MeOH) - MeOH/AF (100%/0.1%)  
20170627\_AZ96\_01 14 (0.293) Cm (14:19-(37.49+1.4)x5.000)

XEVO G2-XS QTOF

27-Jun-2017  
1: TOF MS ES+  
1.08e7

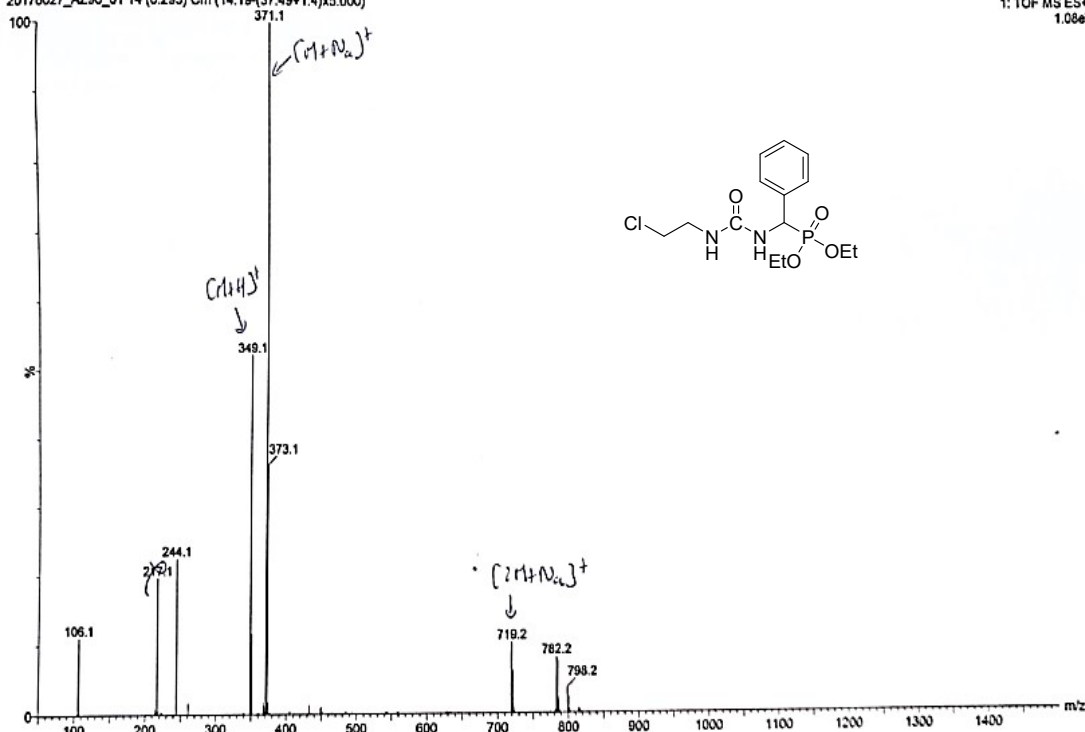

**MS Spectrum:** Diethyl ((3-(2-chloroethyl)ureido)(phenyl)methyl)phosphonate (20)

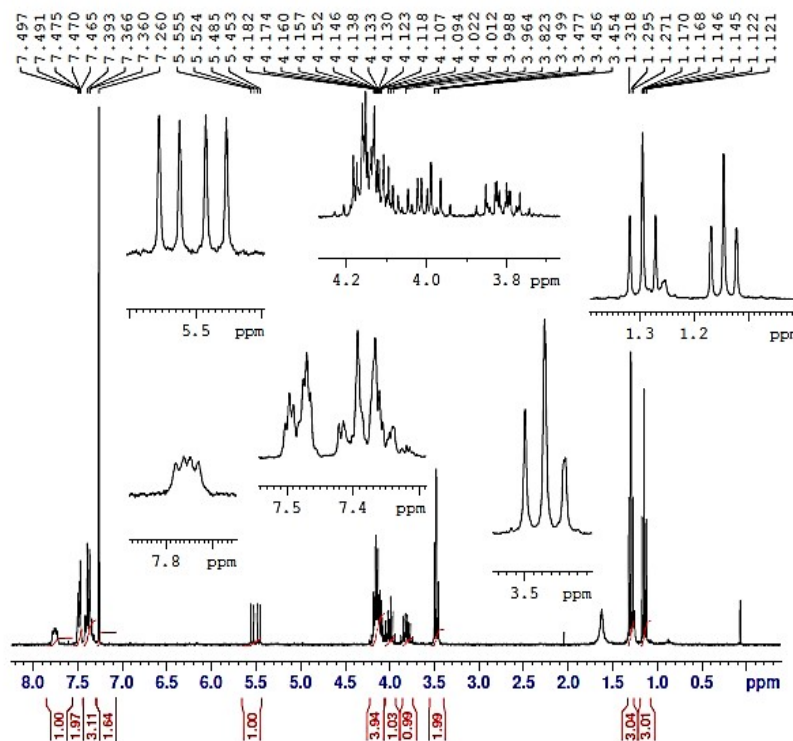

Current Data Parameters  
NAME: AZ126  
EXPNO: 10  
PROCNO: 1

F2 - Acquisition Parameters  
Date\_: 20170627  
Time: 10.20  
INSTRUM: spect  
PROBHD: 5 mm F400 BB-  
PULPROG: zg30  
TD: 49152  
SOLVENT: CDCl3  
NS: 8  
DS: 2  
SWH: 6172.839 Hz  
FIDRES: 0.125587 Hz  
AQ: 3.9813120 sec  
RG: 812.7  
DW: 81.000 usec  
DE: 6.50 usec  
TE: 298.0 K  
D1: 1.00000000 sec  
TD0: 1

===== CHANNEL f1 =====  
NUC1: 1H  
P1: 7.70 usec  
PL1: 2.00 dB  
SFO1: 300.1318534 MHz

F2 - Processing parameters  
SI: 65536  
SF: 300.1300064 MHz  
WFW: EM  
SSB: 0  
LB: 0.30 Hz  
GB: 0  
PC: 1.00

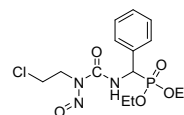

**$^1H$  NMR Spectrum:** Diethyl ((3-(2-chloroethyl)-3-nitrosoureido)(phenyl)methyl)phosphonate (21)

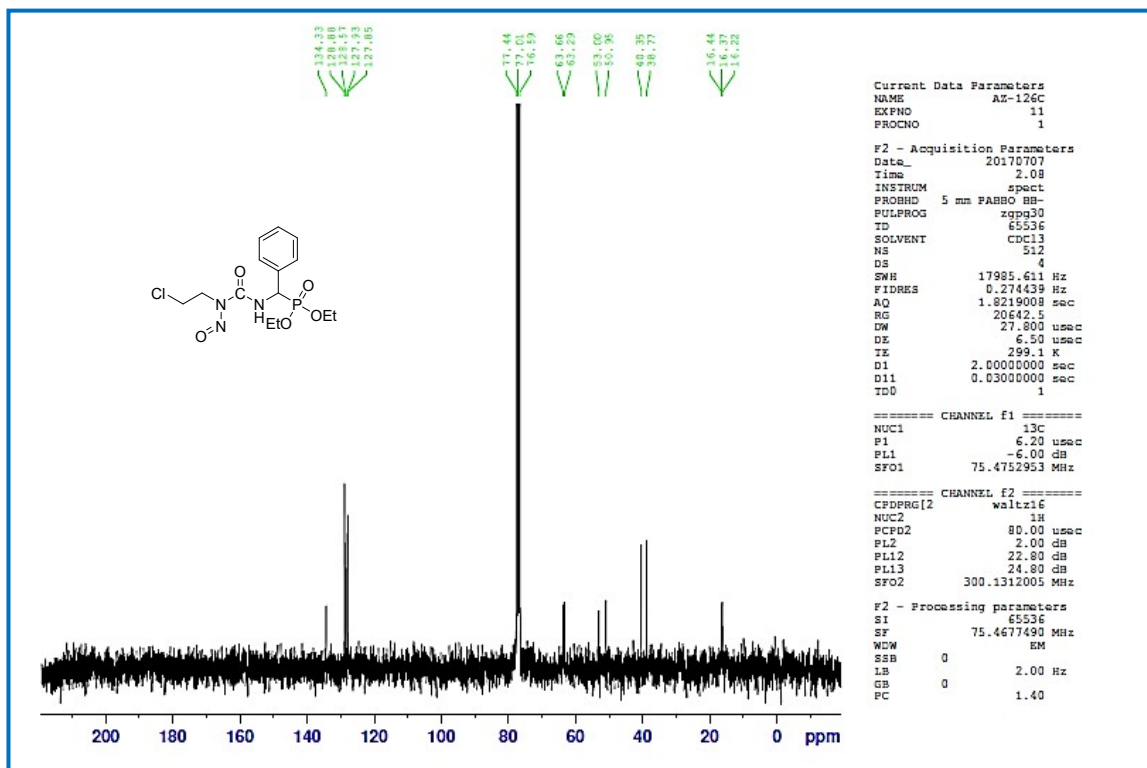

**<sup>13</sup>C NMR Spectrum:** Diethyl ((3-(2-chloroethyl)-3-nitrosoureido)(phenyl)methyl)phosphonate (21)

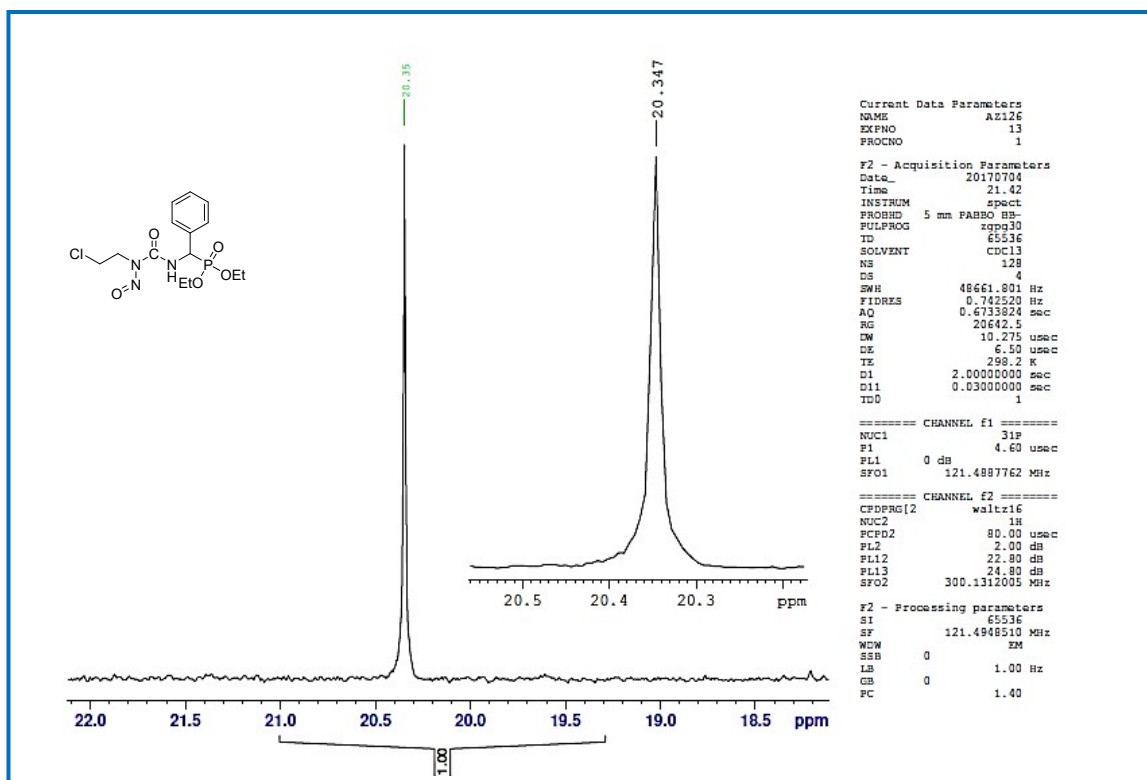

**<sup>31</sup>P NMR Spectrum:** Diethyl ((3-(2-chloroethyl)-3-nitrosoureido)(phenyl)methyl)phosphonate (21)

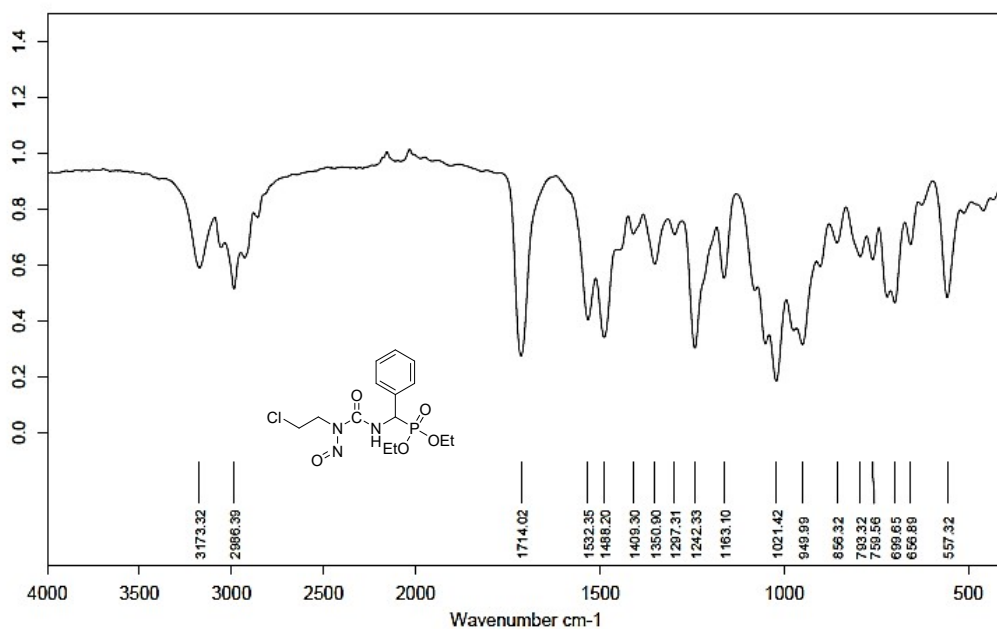

D:\DATA\CEISAM\SYMBIOSE\ZINEB AOUF IR\AZ126.D

AZ126

ATR

13/07/2017

**IR Spectrum:** Diethyl ((3-(2-chloroethyl)-3-nitrosoureido)(phenyl)methyl)phosphonate (**21**)

AZ126 (MeOH) - MeOH/AF (100%/0.1%)  
20176029\_AZ126\_01 13 (0.276) Cm (13.17-1.5x5.000)

XEVO G2-XS QTOF

29-Jun-2017  
1: TOF MS ES+  
1.15e7

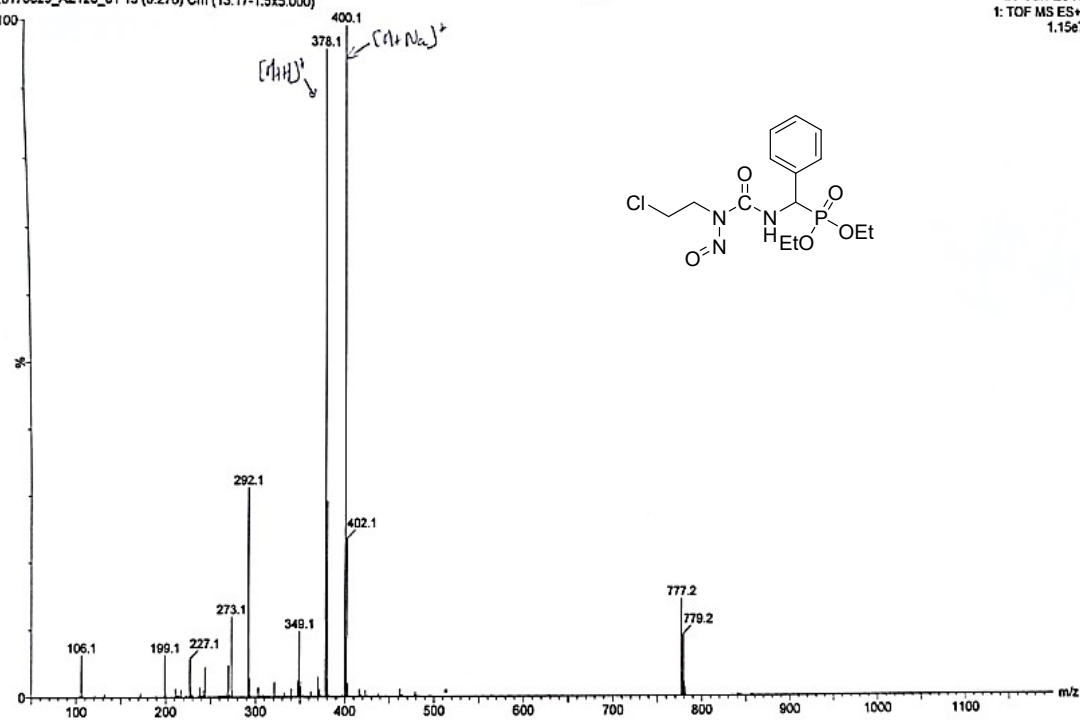

**MS Spectrum:** Diethyl ((3-(2-chloroethyl)-3-nitrosoureido)(phenyl)methyl)phosphonate (**21**)

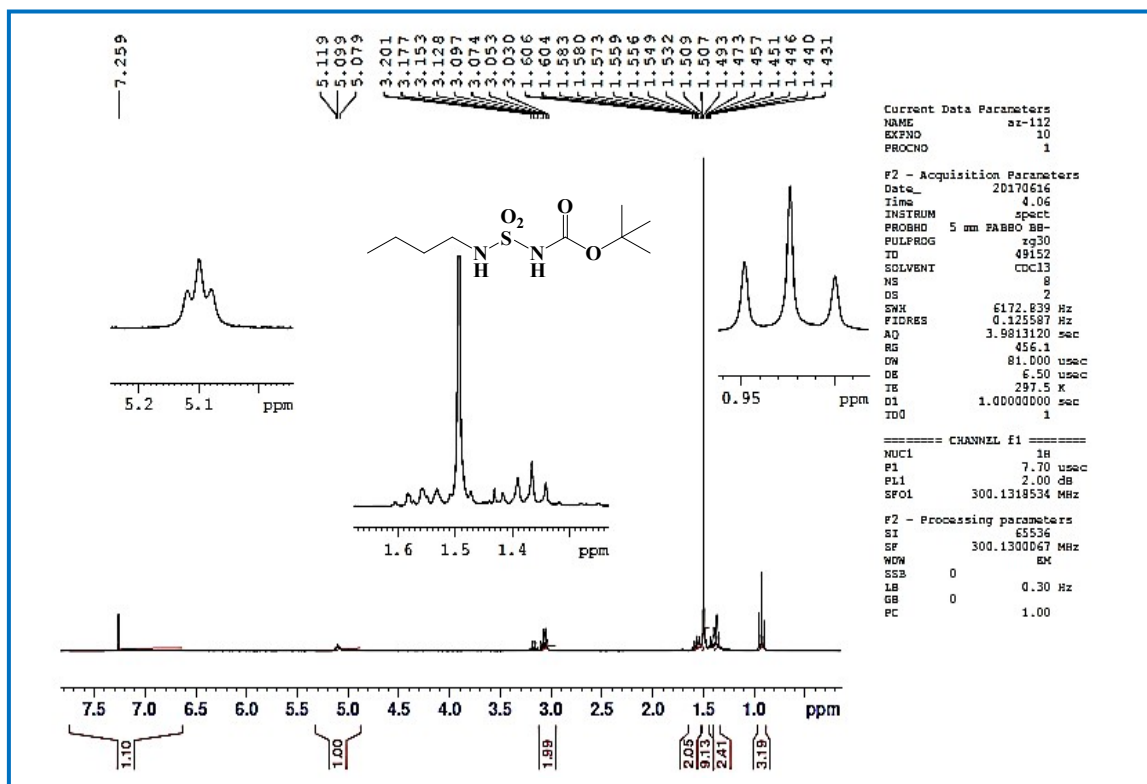

**<sup>1</sup>H NMR Spectrum: Tert-butyl N-butylsulfamoylcarbamate (22)**

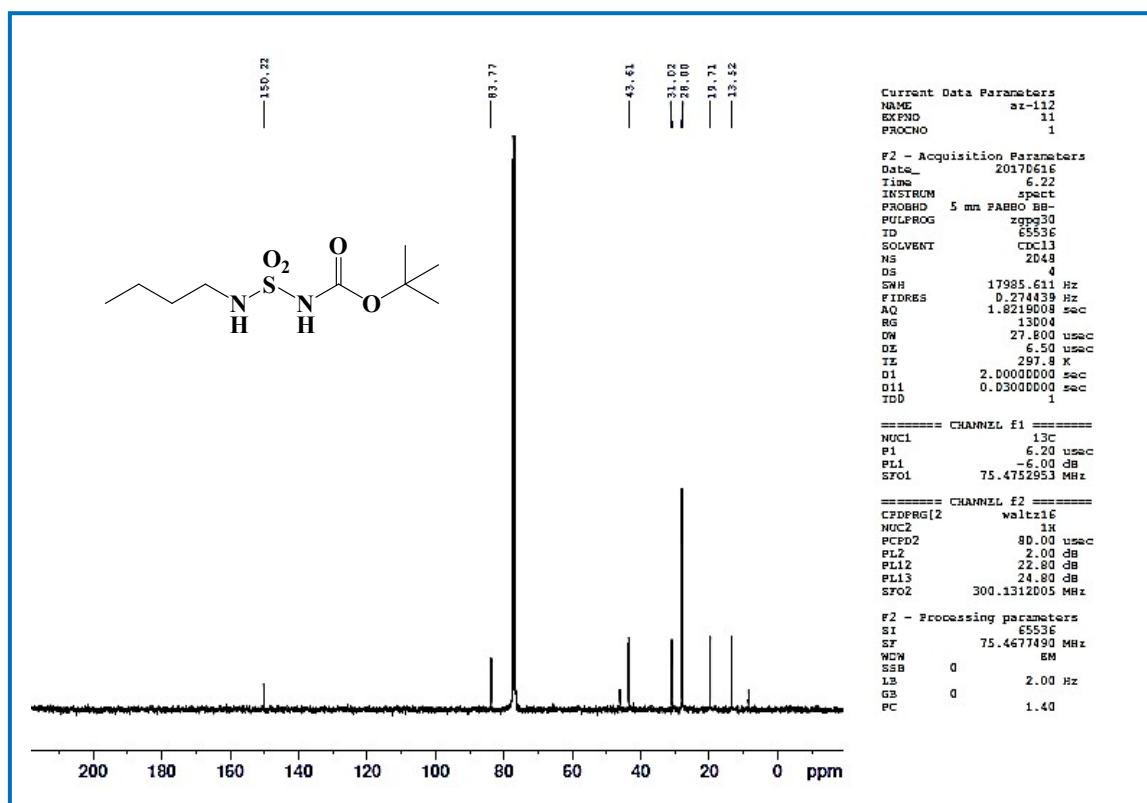

**<sup>13</sup>C NMR Spectrum: Tert-butyl N-butylsulfamoylcarbamate (22)**

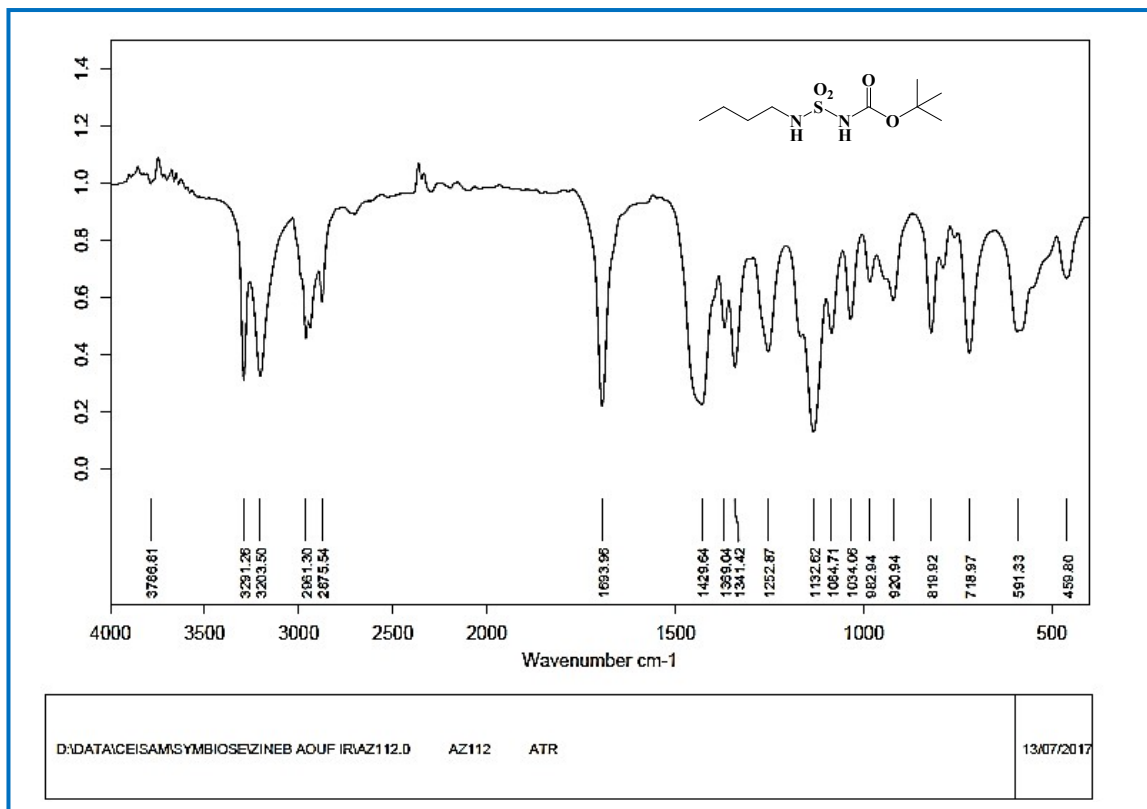

**IR Spectrum:** Tert-butyl N-butylsulfamoylcarbamate (22)

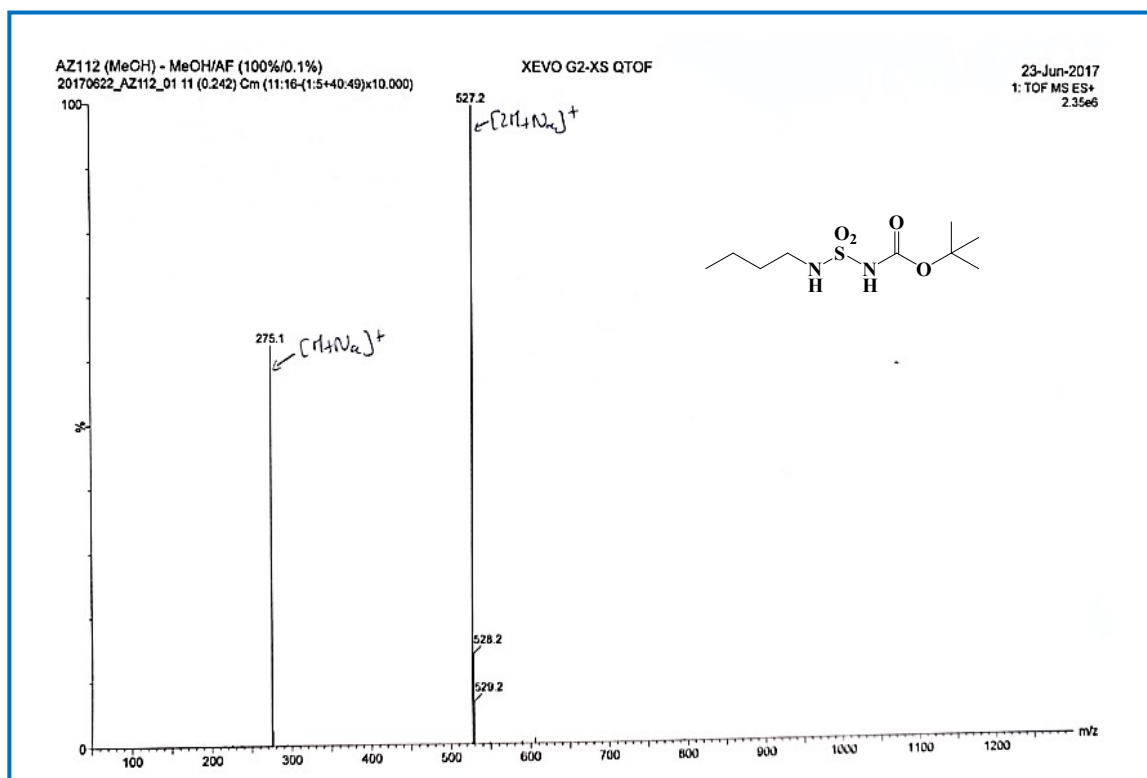

**MS Spectrum:** Tert-butyl N-butylsulfamoylcarbamate (22)

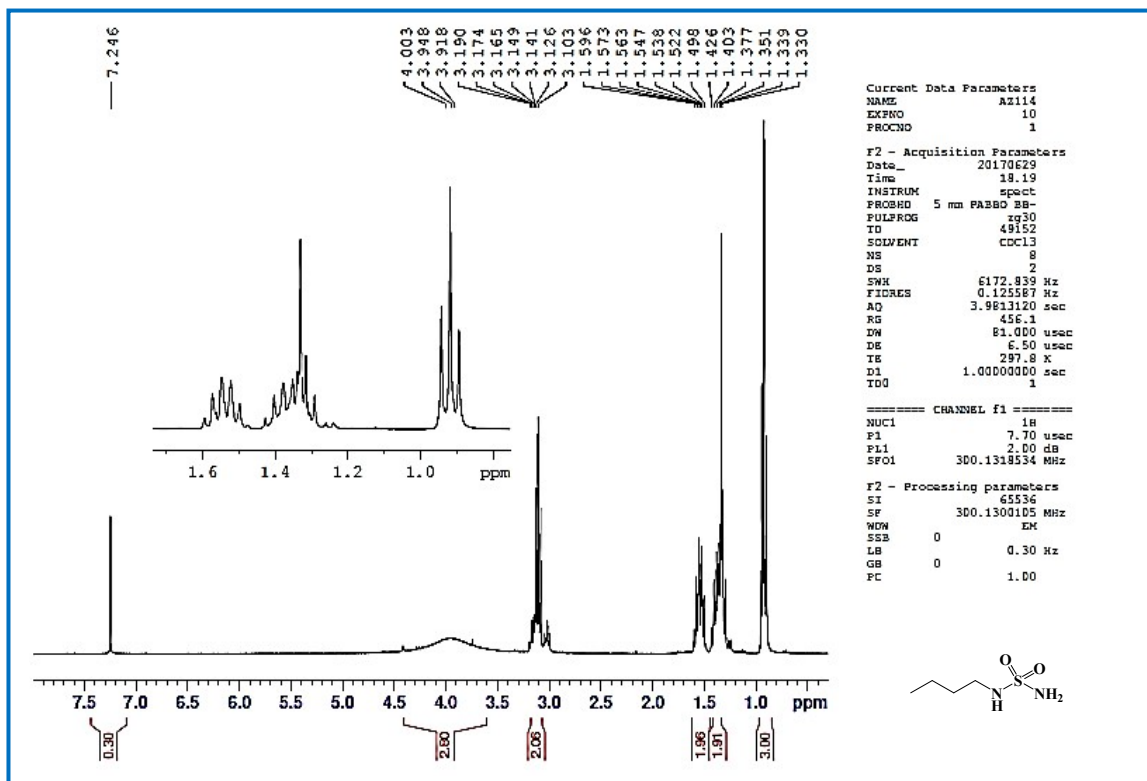

**<sup>1</sup>H NMR Spectrum: N-butylsulfamide (23)**

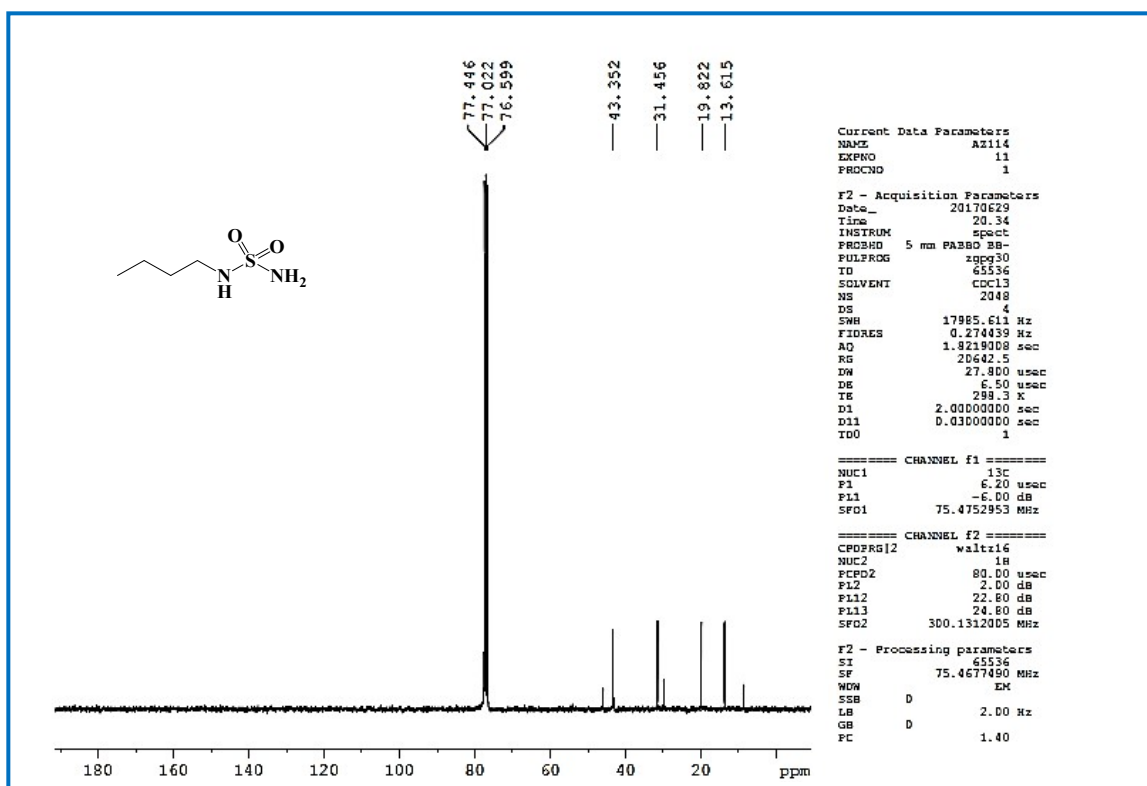

**<sup>13</sup>C NMR Spectrum: N-butylsulfamide (23)**

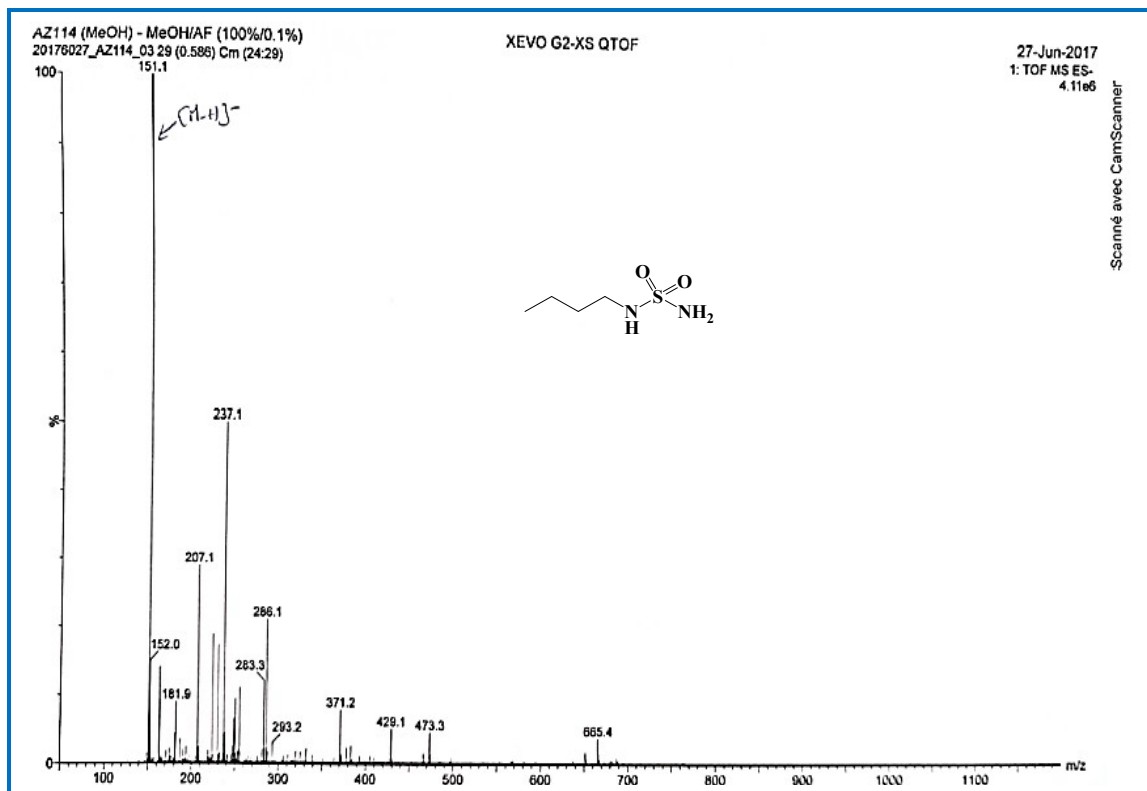

**MS Spectrum: N-butylsulfamide (23)**

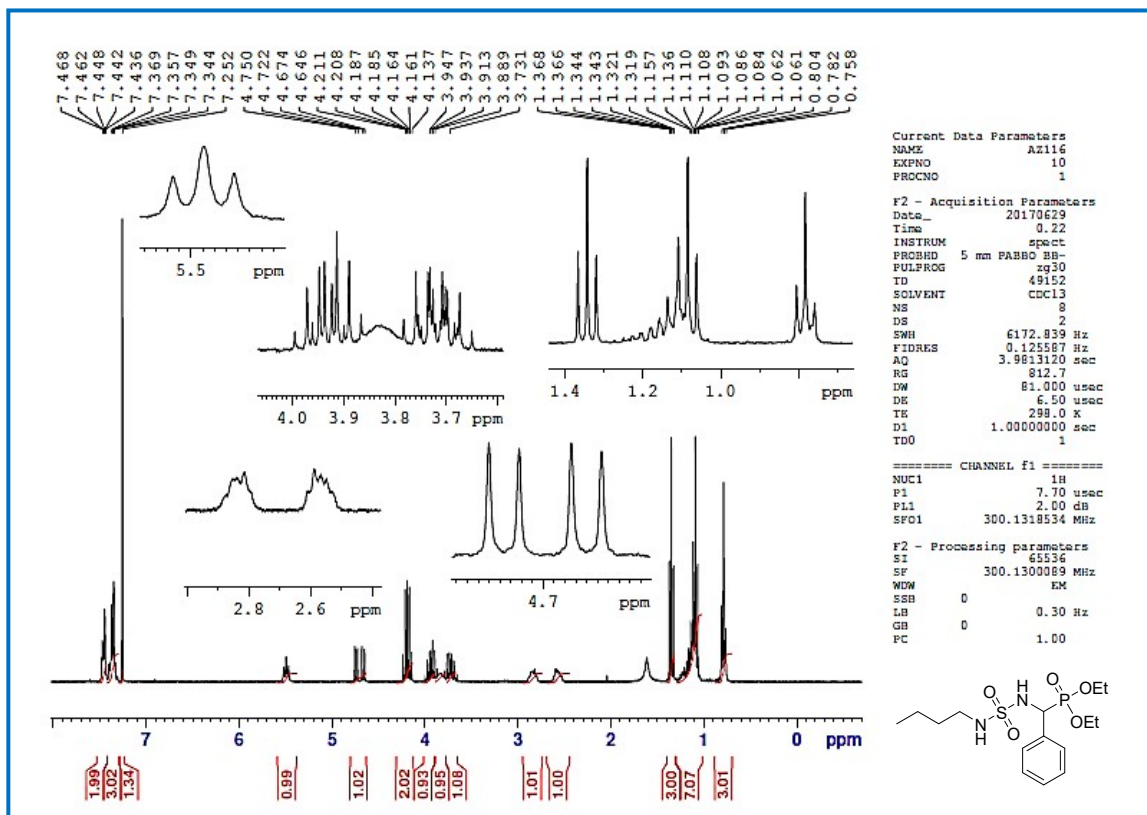

**<sup>1</sup>H NMR Spectrum: Diethyl (((N-butylsulfamoyl)amino)(phenyl)methyl)phosphonate (24)**

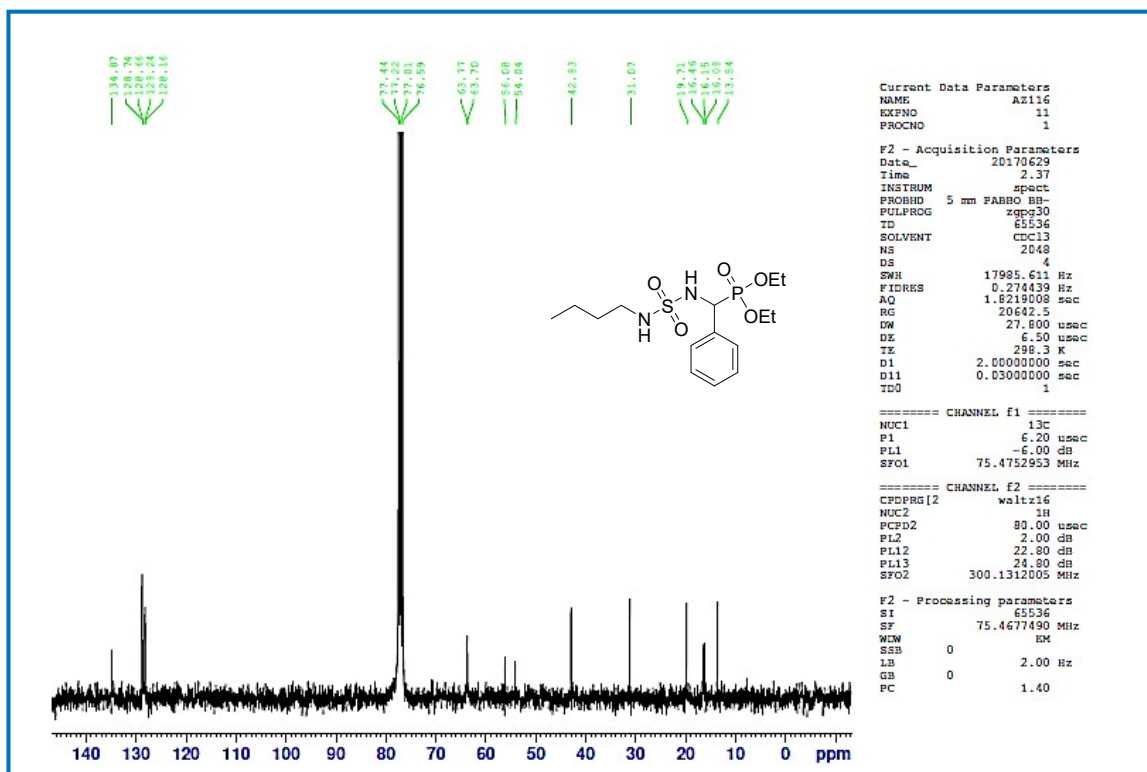

**<sup>13</sup>C NMR Spectrum:** Diethyl (((N-butylsulfamoyl)amino)(phenyl)methyl)phosphonate (**24**)

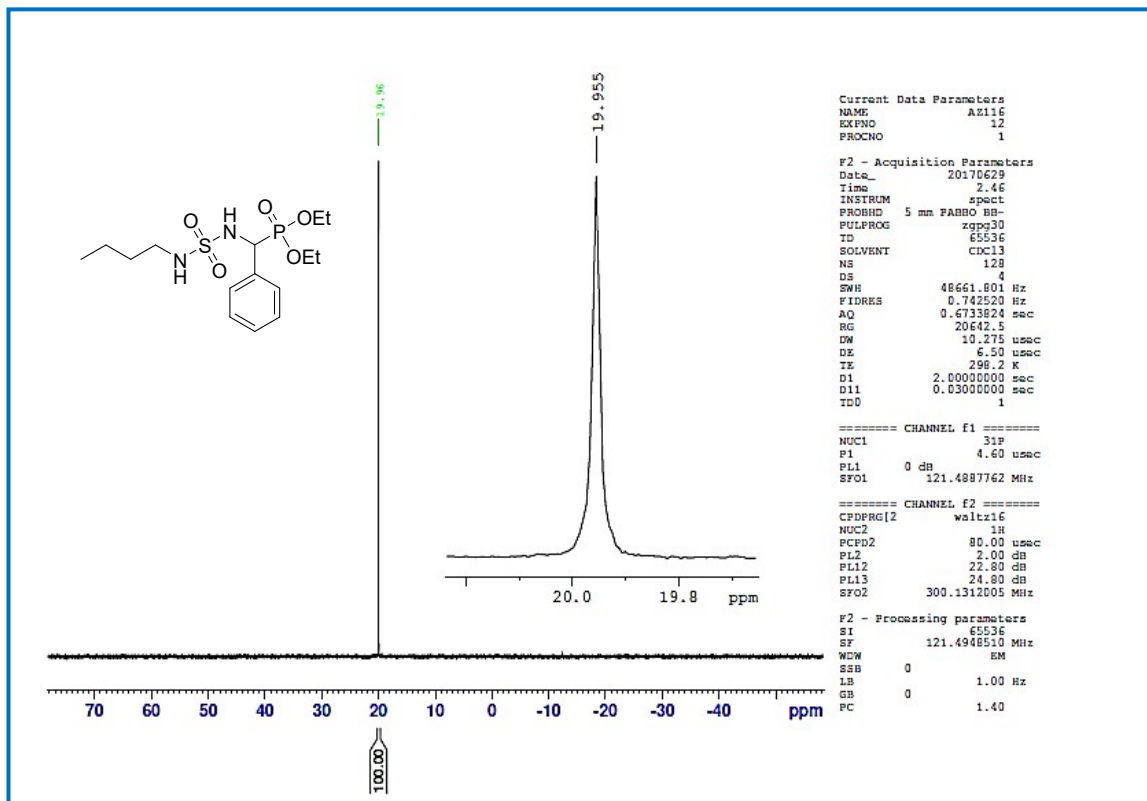

**<sup>31</sup>P NMR Spectrum:** Diethyl (((N-butylsulfamoyl)amino)(phenyl)methyl)phosphonate (**24**)

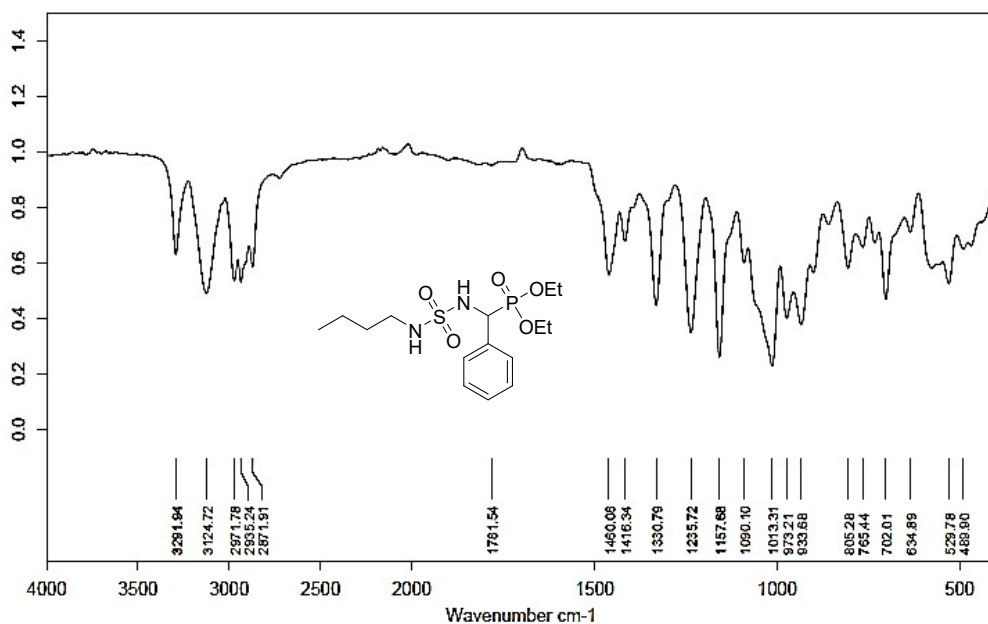

D:\DATA\CE\ISAM\SYMBIOSE\ZINEB AOUF\IR\AZ116.0

AZ116

ATR

13/07/2017

**IR Spectrum:** Diethyl (((N-butylsulfamoyl)amino)(phenyl)methyl)phosphonate (**24**)

AZ116 (MeOH) - MeOH/AF (100%/0.1%)  
20176027\_AZ116\_01 15 (0.310)

XEVO G2-XS QTOF

27-Jun-2017  
1: TOF MS ES+  
8.81e6

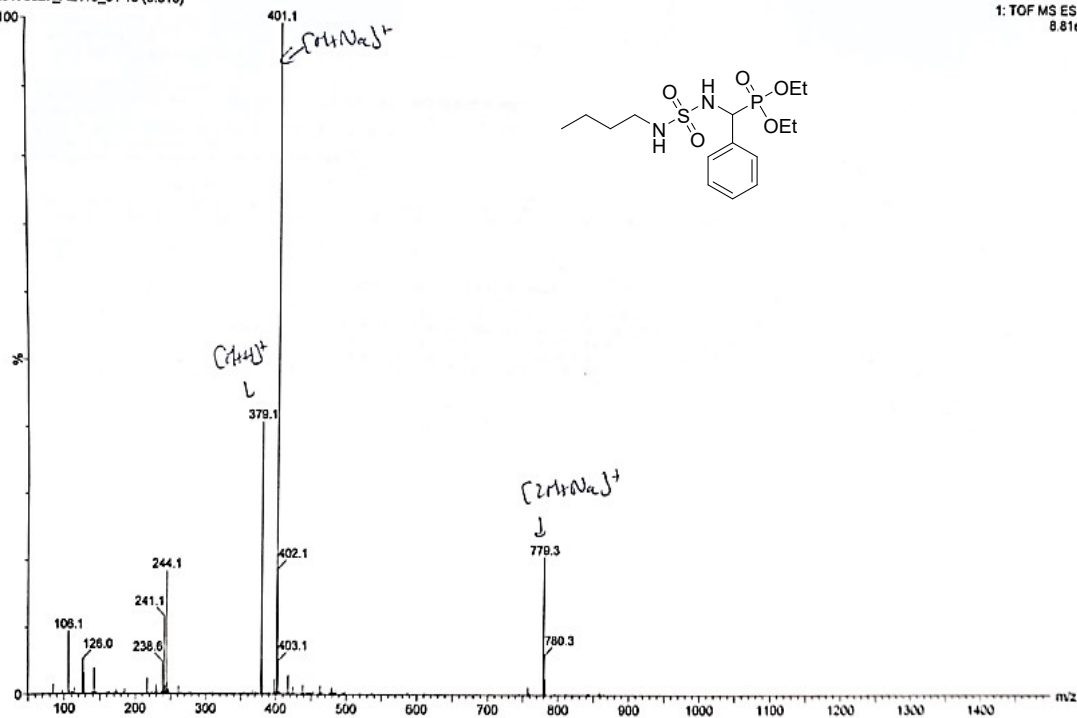

**MS Spectrum:** Diethyl (((N-butylsulfamoyl)amino)(phenyl)methyl)phosphonate (**24**)
